# Supplementary material for: Myoblasts rely on TAp63 to control basal mitochondria respiration
Source: publisher site journal article supplement (doi:10.18632/aging.101668), 2018-11-28
Supplement: Supplementary file [file aging-v10i11-101668-supplementary-material-SD3.pdf]

**SUPPLEMENTARY TABLE**

**Table S2. Primers used in the study.**

| <b>Genes</b> | <b>Primers</b>                    |
|--------------|-----------------------------------|
| mPold4       | F 5'-TCGGAAGCGGTTCACTACTG-3'      |
|              | R 5'-GTACAAGGCCCATACTGCCA-3'      |
| mGas6        | F 5'-GCTGCAGCTTCGGTACAATG-3'      |
|              | R 5'-TGATAGAGGCCCTCTCCAG-3'       |
| mRgcc        | F 5'-TCACTCCTCGGAAAGCCAAA-3'      |
|              | R 5'-GTGAACCAAGAATGGCCAGG-3'      |
| mIgf2        | F 5'-ATCGTGTTACCACCCAAAGACCCC-3'  |
|              | R 5'-GTGATGGAAGTGTCCCTGCTCAAG-3'  |
| mAls2        | F 5'-GCAGAGTACACACTGAGGTTCT-3'    |
|              | R 5'-GGGAACACGTGGTGTGTAGA-3'      |
| mHkl         | F 5'-CTGGGTGAGATCGTCCGTT-3'       |
|              | R 5'-CGAAGATGCCTCGGGTCT-3'        |
| mPdk4        | F 5'-CGCCTGGCCAATATCCCGAA-3'      |
|              | R 5'-TCGAACTTTGACCAGCGTGTAAC-3'   |
| mTAp63       | F 5'-GCAGAGCACCCAGACAAGCGA-3'     |
|              | R 5'-GCACCATTTTCGGAAGGTTCA-3'     |
| mCdkn1a      | F 5'-TGTTCCGCACAGGAGCAAAGTG-3'    |
|              | R 5'-CGAAGTCAAAGTTCCACCGTTCTCG-3' |
| mGapdh       | F 5'-CCTCGTCCCCTAGACAAAATG-3'     |
|              | R 5'-TCTCCACTTTGCCACTGCAA-3'      |
| mt12S        | F 5'-CCCAGTTTGGGTCTTAGCTG-3'      |
|              | R 5'-ACCGCGGTCATACGATTAAC-3'      |
| mtND5        | F 5'-TGATGGTACGGACGAACAGACG-3'    |
|              | R 5'-CTGATGCTAGTCATGGGTGGAG-3'    |
| nSdha        | F 5'-AGACCTTGAATGAGGCTGAGTGTG-3'  |
|              | R 5'-GACACAAAGTGGCGCAACTC-3'      |
