# Supplementary material for: Myoblasts rely on TAp63 to control basal mitochondria respiration
Source: Aging (Albany NY). 2018 Nov 28;10(11):3558–73. doi: 10.18632/aging.101668 (PMC6286837; doi:10.18632/aging.101668)
Supplement: Supplementary Table 1 [file aging-10-101668-s002.xlsx]

## Sheet: Foglio 1
Table S1. Transcripts modulated in sh1-p63 C2C7 cells vs Scramble control
ProbeID	Gene Symbol	Ensembl Transcript ID	logFC	p-value	FDR	FC
A_51_P277336	Sdpr	ENSMUST00000051572	7.80764	2.0493e-17	3.17259e-13	224.044
A_55_P2205878	1700030N03Rik		5.71357	2.93758e-17	3.17259e-13	52.4754
A_66_P121066	Gm773	ENSMUST00000101561	5.47206	5.30466e-15	3.81936e-11	44.3868
A_51_P307828	Defb41	ENSMUST00000088463	5.02105	7.92813e-14	1.42175e-10	32.4703
A_51_P228658	Isyna1	ENSMUST00000019283	4.17936	1.05857e-14	5.71627e-11	18.1181
A_66_P105175	Bche	ENSMUST00000029367	3.87344	1.72338e-12	9.91926e-10	14.6562
A_52_P635271	Btbd6	ENSMUST00000002880	3.80417	3.31173e-10	4.83334e-08	13.9691
A_51_P209150	Pcdh10	ENSMUST00000171554	3.78728	6.33652e-13	5.89297e-10	13.8065
A_51_P289889	Npnt	ENSMUST00000042729	3.71007	8.42985e-14	1.42175e-10	13.0871
A_55_P1965416	Atp9a	ENSMUST00000178504	3.70602	1.30776e-12	8.72195e-10	13.0504
A_55_P1978131	Vmn2r78	ENSMUST00000170835	3.62729	4.9565e-09	3.71737e-07	12.3573
A_55_P2000958	Sdr39u1	ENSMUST00000111325	3.47969	1.92193e-05	0.000225741	11.1555
A_52_P596595	Pnma2	ENSMUST00000089236	3.36456	3.9995e-10	5.43328e-08	10.2999
A_51_P146560	Msln	ENSMUST00000075884	3.34068	3.04742e-13	4.11401e-10	10.1308
A_51_P203955	Gbp2	ENSMUST00000165774	3.28198	7.29981e-14	1.42175e-10	9.72687
A_51_P342567	Akap12	ENSMUST00000045730	3.20562	3.36147e-14	1.21013e-10	9.22544
A_52_P515036	Htatip2	ENSMUST00000085272	3.04786	1.97552e-08	1.04331e-06	8.26982
A_55_P1964183	Dysf	ENSMUST00000113823	2.97764	7.74052e-11	1.74162e-08	7.87694
A_55_P2006386	Defb28	ENSMUST00000121912	2.90531	7.43687e-12	2.92066e-09	7.49179
A_52_P106620	Tnfrsf11b	ENSMUST00000079772	2.90199	1.81319e-10	3.10833e-08	7.47457
A_51_P335993	Plac8l1	ENSMUST00000081374	2.82142	1.04447e-10	2.12836e-08	7.06859
A_51_P390038	Cpa6	ENSMUST00000035577	2.80868	9.32252e-11	1.98936e-08	7.00641
A_55_P1964638	Cxadr	ENSMUST00000023572	2.79997	1.42071e-10	2.51844e-08	6.96428
A_55_P2117425	Syt5	ENSMUST00000065957	2.77071	7.66552e-13	6.21442e-10	6.82444
A_55_P2006385	Defb28	ENSMUST00000121912	2.73856	2.20332e-09	2.04257e-07	6.67405
A_55_P2091942	BC061237	ENSMUST00000096899	2.73111	1.07549e-12	7.49374e-10	6.63966
A_52_P266132	Fgl2	ENSMUST00000035799	2.69324	6.65597e-10	8.07691e-08	6.46766
A_51_P335969	Des	ENSMUST00000027409	2.67864	1.0519e-13	1.51474e-10	6.40252
A_55_P2047275	Tspan7	ENSMUST00000149982	2.66834	1.59236e-08	9.02756e-07	6.35697
A_55_P1993549	Npnt	ENSMUST00000042729	2.66802	3.32679e-13	4.22697e-10	6.35559
A_51_P431329	Car3	ENSMUST00000029076	2.65629	1.33252e-12	8.72195e-10	6.30411
A_52_P599317	Hs6st2		2.65151	3.93028e-13	4.46811e-10	6.28325
A_55_P1962304	Plac8	ENSMUST00000031264	2.61401	3.42872e-11	9.37472e-09	6.12202
A_51_P133792	Prickle3	ENSMUST00000123172	2.61396	8.71246e-10	1.00481e-07	6.12182
A_51_P168792	Xylb	ENSMUST00000039610	2.60231	8.05573e-13	6.21442e-10	6.07259
A_51_P413059	Mcpt8	ENSMUST00000015594	2.58661	3.7082e-07	1.06371e-05	6.00686
A_51_P153423	Fndc1	ENSMUST00000097425	2.57655	4.72227e-11	1.2143e-08	5.96513
A_52_P607683	Ppm1e	ENSMUST00000055438	2.56626	2.16647e-07	6.97539e-06	5.92271
A_55_P1962305	Plac8	ENSMUST00000112910	2.51831	1.27408e-11	4.16972e-09	5.7291
A_55_P2132596	Pcdh10		2.51122	6.57651e-10	8.02557e-08	5.70103
A_55_P2023762	Epha4	ENSMUST00000027451	2.51068	4.70659e-08	2.13576e-06	5.69888
A_51_P205106	Mlf1	ENSMUST00000077916	2.49438	7.86595e-13	6.21442e-10	5.63484
A_55_P2028015	Pawr	ENSMUST00000095313	2.49145	1.41857e-07	4.94213e-06	5.62342
A_52_P436590	Wbscr17	ENSMUST00000086023	2.48584	3.8763e-10	5.333e-08	5.60162
A_55_P2025690	Slc5a7	ENSMUST00000095712	2.47797	7.20184e-10	8.50053e-08	5.57114
A_55_P2134236	Foxa2	ENSMUST00000047315	2.47263	1.08784e-06	2.5266e-05	5.55053
A_66_P135391	Igfbp2	ENSMUST00000047328	2.4535	2.04553e-12	1.13291e-09	5.47742
A_51_P445562	Chst10	ENSMUST00000027249	2.41571	5.53579e-11	1.35878e-08	5.33583
A_55_P2066230	Hck	ENSMUST00000003370	2.40205	1.14346e-09	1.24114e-07	5.28552
A_51_P496540	Sh2d1b1	ENSMUST00000179976	2.39071	1.46346e-07	5.07396e-06	5.24416
A_52_P269942	Cpt1c	ENSMUST00000063761	2.34658	5.40567e-13	5.30738e-10	5.08616
A_52_P384718	Cdh10	ENSMUST00000176146	2.3384	6.08715e-12	2.43486e-09	5.0574
A_51_P124535	Mest	ENSMUST00000163949	2.33807	2.4245e-11	6.98257e-09	5.05625
A_55_P1969416	Sntg1	ENSMUST00000140302	2.33566	1.52697e-11	4.85039e-09	5.04783
A_51_P196925	Cx3cl1	ENSMUST00000034230	2.30744	1.65638e-12	9.91926e-10	4.95004
A_55_P1979330	Dapp1	ENSMUST00000029806	2.30682	1.70388e-08	9.43688e-07	4.94793
A_55_P2114118	Cadm1	ENSMUST00000085909	2.29181	9.03052e-12	3.30609e-09	4.89671
A_55_P2097219	Gbp2b	ENSMUST00000029936	2.28054	8.09977e-06	0.000116949	4.85859
A_55_P2176145	Rgs17	ENSMUST00000117676	2.27882	2.0471e-11	6.14129e-09	4.85281
A_55_P2110548	Chrnd	ENSMUST00000073252	2.24163	4.95143e-11	1.24362e-08	4.72931
A_55_P2056729	Igfbp2	ENSMUST00000047328	2.19184	1.89489e-10	3.19763e-08	4.56888
A_55_P2039250	Mboat2	ENSMUST00000110942	2.18946	6.80344e-09	4.65046e-07	4.56135
A_51_P428754	Grik5	ENSMUST00000003468	2.18917	1.37541e-08	8.0294e-07	4.56044
A_55_P1970424	Fam221a	ENSMUST00000141910	2.18888	1.16978e-09	1.26336e-07	4.55953
A_51_P251129	Stard8	ENSMUST00000036606	2.18232	0.000111943	0.000865864	4.53882
A_51_P454103	Manba	ENSMUST00000029814	2.17782	3.509e-10	4.96198e-08	4.52468
A_55_P2047310	Pdgfb	ENSMUST00000000500	2.1699	3.0943e-09	2.61082e-07	4.49991
A_51_P328631	Sis	ENSMUST00000094190	2.16087	3.50764e-10	4.96198e-08	4.47185
A_52_P64514	Herc6	ENSMUST00000031817	2.14932	3.32485e-09	2.73068e-07	4.43617
A_55_P2111331	Klhl32	ENSMUST00000108218	2.14627	3.26509e-09	2.71059e-07	4.42682
A_51_P511680	Ttc38	ENSMUST00000133158	2.14196	4.31386e-09	3.33977e-07	4.4136
A_51_P106799	Pparg	ENSMUST00000171644	2.13104	1.14538e-11	3.92701e-09	4.38033
A_55_P1959763	Dach1	ENSMUST00000071533	2.12249	7.65124e-06	0.000111894	4.35444
A_52_P496924	Mgat4a	ENSMUST00000154819	2.11576	1.19865e-08	7.27273e-07	4.33418
A_55_P2067652	Boc	ENSMUST00000114634	2.06619	1.24496e-10	2.37974e-08	4.1878
A_55_P1970583	Ttc38	ENSMUST00000146088	2.06113	2.40956e-09	2.18683e-07	4.17312
A_55_P2175486	Gm10375	ENSMUST00000100692	2.05074	1.06496e-08	6.61011e-07	4.14318
A_55_P2032750	Cpt1c	ENSMUST00000063761	2.04174	7.24746e-11	1.68328e-08	4.11741
A_51_P398766	Gbp2b	ENSMUST00000029936	2.03877	3.3567e-10	4.83365e-08	4.10895
A_66_P134457	Sntg1	ENSMUST00000140302	2.03582	2.86914e-09	2.47894e-07	4.10056
A_52_P203316	Kcnf1	ENSMUST00000170580	2.02678	1.72034e-08	9.49832e-07	4.07495
A_55_P2011163	BC061237	ENSMUST00000096899	2.00871	2.60215e-10	4.10266e-08	4.02422
A_51_P210956	Vcam1	ENSMUST00000029574	2.00772	4.16833e-12	1.80072e-09	4.02146
A_55_P2130792	Tuft1	ENSMUST00000107279	1.9971	4.90046e-11	1.24362e-08	3.99197
A_55_P2127179		ENSMUST00000178160	1.9936	2.74208e-09	2.40768e-07	3.98231
A_51_P211131	Traf3ip2	ENSMUST00000129693	1.97756	3.25807e-09	2.71059e-07	3.93827
A_52_P398998	Gfra1	ENSMUST00000169850	1.9694	1.96435e-10	3.23894e-08	3.91605
A_52_P532456	Plagl1	ENSMUST00000121646	1.96771	5.31576e-09	3.90546e-07	3.91147
A_51_P472829	Aif1l	ENSMUST00000001920	1.96002	2.41509e-12	1.24205e-09	3.89067
A_55_P2021505	Adra2a	ENSMUST00000036700	1.95873	1.09877e-07	4.07093e-06	3.88719
A_51_P124254	Col4a1	ENSMUST00000033898	1.95545	4.80083e-10	6.10453e-08	3.87837
A_51_P411345	Mogat2	ENSMUST00000064231	1.94366	2.7511e-10	4.21445e-08	3.8468
A_55_P1987730	Fam213a	ENSMUST00000022317	1.94109	6.27622e-09	4.34508e-07	3.83996
A_52_P464228	1700009N14Rik	ENSMUST00000029955	1.93594	4.80449e-10	6.10453e-08	3.82627
A_51_P218653	Jph2	ENSMUST00000017961	1.93499	6.01987e-09	4.24359e-07	3.82377
A_55_P2472435	Gbp3	ENSMUST00000106222	1.9196	1.23744e-09	1.32978e-07	3.78317
A_52_P590396	Sort1	ENSMUST00000102632	1.90805	5.19206e-07	1.38455e-05	3.75301
A_55_P2078695	Fbxl13	ENSMUST00000051358	1.90523	6.62483e-11	1.58996e-08	3.74569
A_51_P351896	Fam198b	ENSMUST00000029567	1.87463	1.54806e-08	8.86174e-07	3.66707
A_55_P1954758	Prickle1	ENSMUST00000109255	1.8743	1.24026e-11	4.12148e-09	3.66625
A_55_P2007088	Rnf128	ENSMUST00000113026	1.87278	1.50779e-09	1.57334e-07	3.66237
A_51_P425847	Ulbp1		1.84899	1.56464e-09	1.60935e-07	3.60247
A_55_P2071236	Aqp5	ENSMUST00000088200	1.84552	1.83435e-10	3.11983e-08	3.59383
A_51_P407248	Antxr1	ENSMUST00000042025	1.83339	1.91964e-10	3.21428e-08	3.56374
A_66_P123704	Ulbp1	ENSMUST00000169796	1.83275	1.07244e-11	3.7975e-09	3.56216
A_55_P1964960	Il33	ENSMUST00000120388	1.80728	5.39947e-09	3.94015e-07	3.49982
A_55_P1990121	Aqp5	ENSMUST00000169082	1.80132	1.29015e-10	2.41175e-08	3.48539
A_52_P316933	Sh3bgrl2	ENSMUST00000113215	1.77767	2.5124e-06	4.80247e-05	3.42873
A_55_P1971010	Gzme	ENSMUST00000089549	1.77746	1.6117e-08	9.06583e-07	3.42822
A_55_P2178678	P2rx5	ENSMUST00000006104	1.77128	5.22496e-09	3.87832e-07	3.41357
A_51_P306151	Sgk3	ENSMUST00000097826	1.76777	0.000175201	0.00122154	3.40527
A_55_P1959828	Slc35g1	ENSMUST00000054098	1.76728	3.64822e-09	2.92135e-07	3.40413
A_55_P2090025	Mest	ENSMUST00000163949	1.75745	3.59919e-10	5.04822e-08	3.38101
A_51_P160913	Mr1	ENSMUST00000027744	1.75107	1.11117e-08	6.85751e-07	3.36609
A_52_P326664	Unc93a	ENSMUST00000084966	1.74862	6.40661e-07	1.6435e-05	3.36038
A_55_P1961968	Plagl1	ENSMUST00000121646	1.73032	1.65418e-09	1.66964e-07	3.31802
A_51_P260740	Pcdh7	ENSMUST00000068110	1.72511	4.35447e-09	3.35916e-07	3.30604
A_55_P2099810	Akap12	ENSMUST00000045730	1.70213	3.72338e-09	2.96771e-07	3.2538
A_51_P417053	Tuft1	ENSMUST00000107279	1.70007	4.34758e-11	1.14522e-08	3.24917
A_52_P160955	Sox11		1.69638	2.89651e-08	1.45499e-06	3.24087
A_55_P2094721	Sox11		1.693	9.77068e-11	2.00997e-08	3.23329
A_55_P1984178	Pde4dip	ENSMUST00000168438	1.68777	1.40061e-08	8.11078e-07	3.22158
A_51_P438805	Txnip	ENSMUST00000049093	1.68649	1.02658e-07	3.86864e-06	3.21873
A_55_P2026530	Erc2	ENSMUST00000090302	1.68398	2.79339e-07	8.55848e-06	3.21313
A_55_P2030662	Eda	ENSMUST00000113779	1.67726	2.34383e-06	4.57332e-05	3.1982
A_55_P2060991	BC005764	ENSMUST00000166057	1.67055	1.76108e-09	1.731e-07	3.18337
A_52_P520495	Vcam1	ENSMUST00000029574	1.66463	7.05136e-10	8.36864e-08	3.17032
A_51_P292008	Gpx3	ENSMUST00000082430	1.66168	8.17516e-07	2.02041e-05	3.16385
A_55_P1956718	Rab38	ENSMUST00000107256	1.64601	3.3631e-09	2.75163e-07	3.12967
A_51_P324228	Satb1	ENSMUST00000152830	1.63941	1.12523e-09	1.22752e-07	3.11539
A_55_P2074591	Ppm1h	ENSMUST00000067918	1.63033	1.30985e-06	2.93494e-05	3.09584
A_51_P114462	Ccl17	ENSMUST00000034232	1.6259	1.74404e-08	9.56125e-07	3.08635
A_51_P278653	Rprm	ENSMUST00000100089	1.62251	4.61077e-07	1.25907e-05	3.07909
A_55_P2172584	Mageb3	ENSMUST00000104936	1.62072	7.96235e-09	5.25954e-07	3.07528
A_51_P205215	Klhl30	ENSMUST00000027533	1.61884	9.11915e-10	1.03185e-07	3.07129
A_51_P260504	Arhgef4	ENSMUST00000047664	1.61202	7.54248e-08	3.07973e-06	3.05679
A_55_P2062936	Abca3	ENSMUST00000039013	1.60781	4.64018e-09	3.54162e-07	3.04788
A_55_P2092993	D330045A20Rik	ENSMUST00000113030	1.60765	3.62919e-08	1.7343e-06	3.04755
A_55_P2058137	Pde4dip	ENSMUST00000168438	1.60563	7.76113e-08	3.15069e-06	3.04329
A_52_P302345	Cyp4v3	ENSMUST00000095328	1.58637	5.97148e-09	4.22898e-07	3.00293
A_55_P2030030	Adssl1	ENSMUST00000180015	1.58036	1.24285e-08	7.47091e-07	2.99045
A_55_P2171658	Stx3	ENSMUST00000069285	1.57499	1.24439e-09	1.33063e-07	2.97934
A_51_P517430	Cd1d1	ENSMUST00000029717	1.57452	6.44237e-07	1.64876e-05	2.97835
A_66_P130887	Pcdh18	ENSMUST00000035931	1.56967	1.30064e-10	2.41175e-08	2.96836
A_66_P132249	Akr1c13	ENSMUST00000021634	1.56631	2.3627e-09	2.16247e-07	2.96147
A_51_P144957	Tram1l1	ENSMUST00000058994	1.56532	6.25418e-11	1.51787e-08	2.95944
A_55_P2019118	AA414768		1.56082	4.79291e-08	2.15075e-06	2.95022
A_55_P1971009	Gzme	ENSMUST00000089549	1.55921	1.32342e-08	7.76792e-07	2.94693
A_55_P2089219			1.55691	2.20484e-11	6.43576e-09	2.94223
A_66_P119045		ENSMUST00000071101	1.55512	8.62724e-07	2.09616e-05	2.93857
A_52_P357469	Frk	ENSMUST00000170771	1.547	0.0133895	0.0338459	2.92209
A_51_P473259	Dpyd	ENSMUST00000039177	1.54589	3.15128e-07	9.40161e-06	2.91983
A_52_P648601	Dusp9	ENSMUST00000019701	1.54196	8.52583e-09	5.53298e-07	2.9119
A_55_P2116536	Kcnf1	ENSMUST00000170580	1.53983	6.23991e-09	4.33383e-07	2.90759
A_51_P349015	Pacrg	ENSMUST00000041463	1.53209	0.00157986	0.00654237	2.89204
A_51_P130332	Hspa12b	ENSMUST00000099349	1.52636	1.37023e-11	4.41747e-09	2.88057
A_55_P2062246	Tgtp2	ENSMUST00000068063	1.52602	3.76009e-09	2.98596e-07	2.8799
A_51_P491350	Col4a2	ENSMUST00000033899	1.5228	2.96155e-09	2.52844e-07	2.87348
A_51_P163354	Ogdhl	ENSMUST00000022480	1.52222	5.25443e-06	8.3699e-05	2.87232
A_52_P639064	Strbp	ENSMUST00000028279	1.52104	0.000724503	0.00360002	2.86998
A_55_P1952587			1.52056	5.87191e-10	7.33141e-08	2.86902
A_52_P1093529	Pik3r5	ENSMUST00000021283	1.51882	3.05985e-09	2.59187e-07	2.86557
A_55_P2031481	Fam131a	ENSMUST00000056518	1.51557	4.79147e-08	2.15075e-06	2.85912
A_55_P1954835	Ramp3		1.51026	3.8064e-07	1.0804e-05	2.84862
A_55_P2164629	Ptn	ENSMUST00000101534	1.50918	4.43072e-08	2.03192e-06	2.84649
A_51_P115005	Edn1	ENSMUST00000021796	1.47984	2.23277e-08	1.15378e-06	2.78918
A_52_P226348	F730043M19Rik		1.4735	3.42243e-09	2.78961e-07	2.77695
A_55_P2155216	Ankrd34a	ENSMUST00000058943	1.47195	6.56981e-09	4.50501e-07	2.77396
A_66_P119034	Pla2g7	ENSMUST00000024706	1.46966	4.06123e-10	5.48267e-08	2.76956
A_51_P516870	Itm2a	ENSMUST00000033591	1.46608	2.13482e-09	1.99968e-07	2.7627
A_65_P18948	Ppm1h	ENSMUST00000067918	1.46442	8.59537e-07	2.092e-05	2.75952
A_51_P318510	Ptprn	ENSMUST00000027404	1.4616	1.52867e-07	5.24114e-06	2.75414
A_51_P293938	Rasl11b	ENSMUST00000051937	1.45809	9.9133e-08	3.7765e-06	2.74744
A_51_P376347	Hebp1	ENSMUST00000045855	1.45427	2.39517e-10	3.86088e-08	2.74018
A_52_P619192	Rundc3b	ENSMUST00000047485	1.44822	6.84218e-05	0.000598344	2.72872
A_55_P2057035	Slmo1	ENSMUST00000025411	1.43357	3.77309e-08	1.78324e-06	2.70114
A_51_P242859	Akr1c12	ENSMUST00000021632	1.43273	3.18273e-08	1.55889e-06	2.69956
A_51_P350453	Pdk4	ENSMUST00000019721	1.43196	1.35826e-09	1.44524e-07	2.69814
A_52_P220440	Slc6a15	ENSMUST00000074204	1.43072	7.95341e-07	1.98835e-05	2.69581
A_55_P2174203	Lims2	ENSMUST00000025254	1.42665	3.13713e-08	1.54004e-06	2.68821
A_55_P1979997	1700026L06Rik	ENSMUST00000124840	1.42323	0.0029157	0.0104375	2.68184
A_55_P1973563	5730559C18Rik	ENSMUST00000120339	1.40919	1.50347e-07	5.17118e-06	2.65589
A_52_P350537	Mtmr11	ENSMUST00000147245	1.40827	8.08516e-07	2.00611e-05	2.65418
A_52_P263518	Gng2	ENSMUST00000160013	1.4071	4.30733e-10	5.66552e-08	2.65203
A_55_P2250391	Nbea	ENSMUST00000029374	1.40494	4.58612e-08	2.08988e-06	2.64806
A_55_P2037066	Rex2	ENSMUST00000075775	1.40307	8.53e-09	5.53298e-07	2.64464
A_51_P438967	Gpnmb	ENSMUST00000031840	1.40144	8.47161e-08	3.3514e-06	2.64164
A_51_P371051	Glipr1	ENSMUST00000162508	1.39848	1.42245e-10	2.51844e-08	2.63624
A_55_P2035167	Pcdh7		1.39431	3.69971e-07	1.06268e-05	2.62862
A_55_P2037662	Atp1a3	ENSMUST00000080882	1.38777	7.64386e-11	1.73797e-08	2.61674
A_55_P2101340	Ramp3	ENSMUST00000139540	1.38123	0.000389037	0.00224205	2.60491
A_52_P482897	Areg	ENSMUST00000031325	1.37547	2.87694e-06	5.29769e-05	2.59452
A_55_P2007802	Smarca2	ENSMUST00000025862	1.37467	1.4302e-06	3.13946e-05	2.59309
A_51_P391454	Il7	ENSMUST00000168269	1.37225	3.40014e-07	1.00059e-05	2.58875
A_51_P319070	Retsat	ENSMUST00000070597	1.36369	9.62114e-11	1.99824e-08	2.57343
A_55_P2169415	Cgn	ENSMUST00000107273	1.36235	3.91802e-06	6.70597e-05	2.57104
A_66_P111011	Gata3	ENSMUST00000102976	1.35883	1.30197e-08	7.70483e-07	2.56477
A_51_P150120	Mgst2	ENSMUST00000159400	1.35376	5.4251e-06	8.59871e-05	2.55577
A_55_P2136204	Rnf38	ENSMUST00000098098	1.35274	1.56529e-08	8.89746e-07	2.55396
A_55_P1966833	Xaf1	ENSMUST00000094041	1.34763	8.50263e-09	5.53298e-07	2.54495
A_51_P479408	Hyal1	ENSMUST00000010195	1.34696	8.15676e-09	5.37153e-07	2.54376
A_55_P2055123	Frrs1	ENSMUST00000040260	1.3393	2.1265e-08	1.10948e-06	2.53028
A_51_P100298	Stx3	ENSMUST00000069285	1.33587	3.73961e-07	1.06846e-05	2.52427
A_55_P2067505	Slc16a3	ENSMUST00000070653	1.33251	5.50101e-08	2.3956e-06	2.51841
A_52_P538470	Spats2l	ENSMUST00000167085	1.3323	9.56714e-05	0.000766507	2.51804
A_55_P1993594	Dcp1b	ENSMUST00000073909	1.33211	3.33268e-06	5.92477e-05	2.5177
A_55_P2075065	Gm10471	ENSMUST00000180499	1.33117	0.000131052	0.000981526	2.51606
A_52_P401484	Inha	ENSMUST00000037330	1.32065	7.23736e-05	0.000624558	2.49778
A_55_P2227321	Ptprd	ENSMUST00000173376	1.31871	1.38097e-08	8.04017e-07	2.49444
A_55_P2086664	Tspan33	ENSMUST00000046750	1.31347	1.03582e-07	3.89107e-06	2.48539
A_52_P403764	4930402H24Rik	ENSMUST00000139684	1.31184	1.29844e-08	7.70483e-07	2.48258
A_51_P480119	Prelid2	ENSMUST00000070949	1.30784	1.82016e-08	9.87824e-07	2.47571
A_66_P114627	S100a16	ENSMUST00000107335	1.30646	1.94023e-09	1.86262e-07	2.47334
A_55_P2156638	Gpr114	ENSMUST00000128308	1.29658	2.3574e-07	7.47721e-06	2.45646
A_52_P571371	Tmem144	ENSMUST00000029568	1.29657	4.07438e-07	1.13851e-05	2.45645
A_52_P377693	Fsd1	ENSMUST00000011733	1.29367	1.15647e-06	2.64617e-05	2.45151
A_51_P468464	Gdpd5	ENSMUST00000037528	1.29332	7.08369e-11	1.66313e-08	2.45092
A_55_P2182736	Limd2	ENSMUST00000045923	1.29319	2.8508e-09	2.47299e-07	2.4507
A_51_P329949	Fam13a	ENSMUST00000089860	1.29092	2.77419e-08	1.40994e-06	2.44684
A_66_P100165	Serpini1	ENSMUST00000161776	1.29048	3.94862e-06	6.73699e-05	2.44609
A_55_P1989573	Tmem175	ENSMUST00000120327	1.28484	5.77517e-08	2.49487e-06	2.43655
A_55_P2017710	Igsf9	ENSMUST00000052629	1.28295	3.26609e-08	1.58178e-06	2.43335
A_55_P2070441	Sp6	ENSMUST00000107622	1.28117	1.54702e-05	0.000191603	2.43036
A_55_P2399529	5930409G06Rik		1.28027	6.73389e-08	2.81884e-06	2.42884
A_52_P706060	Mex3a	ENSMUST00000172699	1.27881	1.37646e-10	2.49331e-08	2.42639
A_55_P2063755	Naip6	ENSMUST00000118574	1.27752	4.01815e-07	1.13158e-05	2.42422
A_51_P469688	Syt17	ENSMUST00000081574	1.27748	6.22519e-08	2.64547e-06	2.42415
A_55_P2050273	Cct6b	ENSMUST00000100722	1.27372	2.36137e-08	1.21442e-06	2.41784
A_51_P248666	Cd274	ENSMUST00000016640	1.26885	2.79116e-06	5.18392e-05	2.4097
A_51_P348665	Ramp1	ENSMUST00000097648	1.26363	0.00014814	0.00107449	2.40099
A_51_P312336	Slc14a1	ENSMUST00000160639	1.25939	6.09327e-07	1.57721e-05	2.39395
A_55_P2080130	Aim2	ENSMUST00000166137	1.2569	1.91607e-07	6.30903e-06	2.38981
A_55_P2012729	Kcnh2	ENSMUST00000036092	1.25578	1.29304e-06	2.90395e-05	2.38796
A_51_P420400	Lef1	ENSMUST00000029611	1.25567	1.71834e-09	1.70258e-07	2.38778
A_55_P2082974	Irak2	ENSMUST00000113024	1.25223	5.13041e-07	1.37417e-05	2.38209
A_51_P352594	St5	ENSMUST00000077909	1.24937	0.00178287	0.00718203	2.37738
A_52_P547662	P2ry1	ENSMUST00000029331	1.24741	1.60961e-05	0.000198219	2.37415
A_55_P1991530	AK129341	ENSMUST00000037397	1.24586	8.8013e-08	3.43553e-06	2.37159
A_51_P394394	Tspan2	ENSMUST00000029451	1.24507	1.12232e-07	4.14395e-06	2.37031
A_65_P10673	Tmem44	ENSMUST00000149110	1.24367	2.97536e-09	2.53023e-07	2.368
A_66_P132832	Myzap	ENSMUST00000163708	1.24282	2.65967e-07	8.23049e-06	2.36661
A_55_P2138961	Tpk1	ENSMUST00000114644	1.23913	2.335e-07	7.43894e-06	2.36056
A_55_P2028837	Tspan2	ENSMUST00000029451	1.2354	8.5276e-08	3.36739e-06	2.35447
A_51_P462391	Gdap1	ENSMUST00000026879	1.23507	9.88863e-06	0.000135874	2.35393
A_51_P312121	Xdh	ENSMUST00000024866	1.234	0.00120323	0.00533669	2.35219
A_55_P2117559	Siglec15	ENSMUST00000170760	1.23072	7.77872e-08	3.15069e-06	2.34685
A_51_P164203	Nme4	ENSMUST00000025007	1.22991	2.69315e-10	4.18504e-08	2.34552
A_55_P2012572	Negr1	ENSMUST00000074015	1.22838	2.45225e-05	0.000272612	2.34304
A_52_P140005	Nipal1	ENSMUST00000087212	1.22446	4.6475e-06	7.60499e-05	2.33668
A_55_P2169227	Ccdc184	ENSMUST00000031914	1.21844	1.13075e-07	4.16793e-06	2.32694
A_55_P2126820	Gm5800	ENSMUST00000095916	1.21769	1.8831e-09	1.81584e-07	2.32575
A_66_P140327	Negr1		1.21722	3.20097e-05	0.000334986	2.32499
A_51_P141071	Cand2	ENSMUST00000075995	1.21523	4.19611e-07	1.16401e-05	2.32178
A_51_P159833	Pcdhb15	ENSMUST00000050034	1.21307	3.44617e-07	1.00864e-05	2.3183
A_51_P515242	Strip2	ENSMUST00000151738	1.21298	1.10667e-07	4.09316e-06	2.31816
A_51_P487547	Ccdc91	ENSMUST00000032441	1.21144	4.03287e-09	3.15616e-07	2.31569
A_55_P1966721	9930105H17Rik		1.20864	1.64417e-09	1.66732e-07	2.3112
A_52_P89477	Bcl9	ENSMUST00000046521	1.20695	9.48328e-08	3.63189e-06	2.30849
A_52_P220573	Serpini1	ENSMUST00000029423	1.20606	3.44326e-07	1.00864e-05	2.30707
A_55_P2132921	Gm13247	ENSMUST00000179175	1.20377	1.76305e-09	1.731e-07	2.30341
A_55_P2114133	Garnl3	ENSMUST00000049618	1.19699	1.12492e-08	6.90293e-07	2.2926
A_55_P1995684	Zfp605	ENSMUST00000144089	1.19632	4.80931e-08	2.15075e-06	2.29154
A_55_P2156126	Sema6c	ENSMUST00000134125	1.19519	5.46569e-08	2.38503e-06	2.28975
A_55_P2041678	Ttc38	ENSMUST00000133158	1.19334	1.85921e-06	3.8283e-05	2.28682
A_55_P2096933	Cntln	ENSMUST00000102819	1.19202	1.01173e-07	3.83392e-06	2.28472
A_55_P2130600	Musk	ENSMUST00000179951	1.19191	8.56861e-08	3.37741e-06	2.28455
A_51_P432794	Fam115c	ENSMUST00000031879	1.18868	5.83903e-09	4.14879e-07	2.27945
A_55_P2359807	Dnajb14	ENSMUST00000090178	1.18768	1.60799e-08	9.06583e-07	2.27786
A_52_P470869	Mipol1	ENSMUST00000130447	1.18734	7.57444e-08	3.08694e-06	2.27732
A_55_P2091943	Gm10375	ENSMUST00000100694	1.18673	8.39249e-06	0.000119684	2.27636
A_55_P2115851	Cemip	ENSMUST00000064174	1.1838	0.00125422	0.00549592	2.27174
A_55_P2098226	C1rl	ENSMUST00000049124	1.18239	3.90156e-09	3.08695e-07	2.26952
A_52_P195018	Arap3	ENSMUST00000042944	1.17918	6.23728e-06	9.59581e-05	2.26448
A_52_P257426	Eps8l2	ENSMUST00000140025	1.17913	1.02074e-05	0.000139113	2.26441
A_52_P518076	Nudt17	ENSMUST00000029742	1.17592	7.41891e-09	4.96125e-07	2.25936
A_52_P75465	Gdpd1	ENSMUST00000020804	1.17389	1.80214e-08	9.80578e-07	2.2562
A_51_P146505	Atp11b	ENSMUST00000134260	1.16806	6.10654e-08	2.6119e-06	2.2471
A_55_P2149575	Sdr39u1	ENSMUST00000111325	1.16524	1.00476e-08	6.29068e-07	2.2427
A_51_P363338	Prkd1	ENSMUST00000002765	1.16338	9.98308e-10	1.11152e-07	2.23981
A_51_P510891	Afp	ENSMUST00000042755	1.16202	2.75927e-07	8.478e-06	2.23771
A_55_P2280237	Zfp697	ENSMUST00000178372	1.16176	3.6002e-05	0.00036664	2.2373
A_51_P212038	Atp6v0e2	ENSMUST00000040361	1.15984	5.90437e-08	2.54052e-06	2.23433
A_51_P328883	Zfp810	ENSMUST00000086278	1.15906	4.64376e-07	1.2617e-05	2.23312
A_55_P2074337	Ngf	ENSMUST00000106925	1.15841	1.48211e-07	5.11334e-06	2.23211
A_52_P659762	Eid2	ENSMUST00000059596	1.15528	1.60517e-09	1.64321e-07	2.22728
A_55_P1971179	Cd1d1	ENSMUST00000029717	1.15341	2.03024e-07	6.59446e-06	2.22439
A_55_P2006677	Gm7969		1.15139	7.19998e-07	1.81682e-05	2.22129
A_51_P195506	Csf1	ENSMUST00000014743	1.14304	1.53852e-09	1.59005e-07	2.20847
A_55_P2058122	Ccbl2	ENSMUST00000044392	1.1425	6.02846e-08	2.58876e-06	2.20763
A_51_P154753	Klc3	ENSMUST00000154419	1.13761	4.0747e-08	1.89684e-06	2.20017
A_55_P1965793	D3Ertd751e	ENSMUST00000143841	1.13637	2.07409e-06	4.17136e-05	2.19827
A_51_P146753	Csf2rb2	ENSMUST00000096356	1.1361	6.21303e-05	0.000554093	2.19786
A_55_P2015363	C1ra	ENSMUST00000068593	1.13609	1.39807e-08	8.11078e-07	2.19784
A_55_P2120459	Snx16	ENSMUST00000029047	1.1327	1.07877e-08	6.6766e-07	2.19268
A_55_P1959425	Slc16a3	ENSMUST00000100130	1.13259	6.90958e-08	2.87013e-06	2.19253
A_55_P2067719	Pcdhgb1		1.13232	1.26538e-07	4.54025e-06	2.19211
A_55_P2096558	Styk1	ENSMUST00000049150	1.13066	8.2054e-05	0.000688297	2.18959
A_55_P2139261	Frrs1		1.12931	0.000133211	0.000994939	2.18754
A_55_P2180551	Fam60a	ENSMUST00000111562	1.12816	2.65678e-07	8.23049e-06	2.18579
A_51_P377452	Ncf4	ENSMUST00000148646	1.12607	4.7882e-05	0.000454816	2.18263
A_52_P53906	Ccnd2	ENSMUST00000000188	1.12537	7.55346e-09	5.03564e-07	2.18157
A_51_P292527	P4htm	ENSMUST00000006853	1.12434	3.29993e-07	9.76771e-06	2.18001
A_51_P213691	Scnn1a	ENSMUST00000081440	1.12413	0.00917729	0.0252682	2.1797
A_55_P1974567	Plch2	ENSMUST00000139976	1.1235	1.8467e-07	6.12728e-06	2.17874
A_52_P282838	Spin2c	ENSMUST00000049999	1.12065	4.59815e-08	2.09095e-06	2.17445
A_51_P356642	Krt19	ENSMUST00000126460	1.12019	5.45991e-08	2.38503e-06	2.17375
A_51_P323148	Mfsd8	ENSMUST00000026859	1.11358	0.000220077	0.00144444	2.16381
A_51_P215922	Casp6	ENSMUST00000152622	1.11122	3.76813e-08	1.78324e-06	2.16028
A_52_P154026	Zcwpw1	ENSMUST00000035852	1.11007	3.96658e-06	6.76229e-05	2.15856
A_52_P29953	Fam212b	ENSMUST00000066610	1.10879	6.23015e-07	1.60098e-05	2.15665
A_51_P334419			1.10737	5.40661e-06	8.58696e-05	2.15453
A_51_P450459	Ccdc74a	ENSMUST00000182822	1.10721	2.04606e-06	4.13036e-05	2.15429
A_55_P2064538	Gm13154	ENSMUST00000081742	1.10329	2.44177e-07	7.72213e-06	2.14844
A_55_P2063376	Add2	ENSMUST00000032069	1.1026	7.36866e-06	0.000108941	2.14741
A_52_P308465	Plxnb1	ENSMUST00000072093	1.10114	1.00365e-05	0.000137468	2.14524
A_51_P495780	Plin4	ENSMUST00000002908	1.09868	3.39903e-06	6.01795e-05	2.14159
A_51_P264634	Strbp	ENSMUST00000028279	1.0979	3.15999e-06	5.69748e-05	2.14043
A_55_P2039099	Zfp605	ENSMUST00000144089	1.09736	1.79811e-07	5.98446e-06	2.13963
A_55_P2053374	Sorbs1		1.09092	3.47251e-09	2.80922e-07	2.13009
A_51_P369862	Nceh1	ENSMUST00000046515	1.09082	1.04768e-07	3.91986e-06	2.12994
A_66_P101251	Chmp3	ENSMUST00000065364	1.08272	2.93265e-05	0.000315151	2.11802
A_55_P1970105	Ltbp2	ENSMUST00000002073	1.08097	4.91762e-08	2.18614e-06	2.11545
A_55_P2167035	Zfand1	ENSMUST00000125734	1.07554	1.7067e-06	3.5903e-05	2.10751
A_51_P517012	Tysnd1	ENSMUST00000020284	1.07371	4.94987e-10	6.25247e-08	2.10485
A_55_P1952768			1.07311	5.51219e-08	2.39564e-06	2.10397
A_55_P1953030	Tnfsf12	ENSMUST00000180946	1.07244	7.2214e-09	4.87445e-07	2.10298
A_52_P480402	Avl9	ENSMUST00000031805	1.07219	8.09872e-07	2.00611e-05	2.10262
A_52_P357055	Ccdc91	ENSMUST00000032441	1.07149	3.34514e-08	1.61644e-06	2.10161
A_55_P2168667	Rbpms2	ENSMUST00000169003	1.07004	4.33175e-08	1.995e-06	2.0995
A_55_P2058957	Syt1	ENSMUST00000064054	1.06951	1.34771e-05	0.000172865	2.09873
A_55_P1987984	Zfpm1		1.06859	5.77722e-07	1.51442e-05	2.09739
A_52_P75777	Lgr6		1.06812	0.00108598	0.00493004	2.0967
A_55_P2063237	Dusp5	ENSMUST00000038287	1.06254	1.93031e-08	1.02696e-06	2.08861
A_55_P2029711	Cdh2	ENSMUST00000025166	1.06186	1.32025e-08	7.76792e-07	2.08762
A_51_P515120	Hs3st3a1	ENSMUST00000058652	1.06163	1.95562e-08	1.03533e-06	2.08729
A_55_P1988424	Tpi1	ENSMUST00000172132	1.06067	7.48329e-08	3.06716e-06	2.0859
A_52_P403246	B230217C12Rik	ENSMUST00000054783	1.0558	3.82081e-06	6.5813e-05	2.07887
A_52_P122673	Cep41	ENSMUST00000140211	1.0555	1.92424e-08	1.02626e-06	2.07844
A_55_P2061739	Tmsb4x	ENSMUST00000112175	1.05499	1.7624e-06	3.68031e-05	2.07771
A_51_P165237	Snx16	ENSMUST00000029047	1.0542	1.94314e-06	3.95961e-05	2.07657
A_51_P326994	Calhm2	ENSMUST00000035822	1.05313	7.26297e-09	4.88723e-07	2.07503
A_51_P419111	Ngly1	ENSMUST00000022310	1.04993	9.36965e-07	2.24373e-05	2.07043
A_55_P1979998	1700026L06Rik	ENSMUST00000102877	1.04675	2.65531e-06	5.0063e-05	2.06588
A_55_P2182945			1.0394	1.77422e-07	5.92321e-06	2.05537
A_51_P475704	Pcdh9		1.03937	0.0167895	0.0405019	2.05532
A_66_P135941	Fam221a	ENSMUST00000141910	1.0387	9.24206e-07	2.22304e-05	2.05438
A_55_P2076871	Lef1	ENSMUST00000029611	1.03603	3.56406e-09	2.87253e-07	2.05057
A_55_P2119737	AA414992		1.03577	3.44331e-07	1.00864e-05	2.0502
A_52_P578581	Igsf11	ENSMUST00000023478	1.03562	1.00492e-05	0.000137468	2.05
A_55_P2091551	Arhgap9	ENSMUST00000069548	1.03392	3.06365e-05	0.000324705	2.04758
A_55_P1956647	Sfmbt2	ENSMUST00000041105	1.0332	3.38481e-05	0.000349985	2.04656
A_51_P444335	Acp6	ENSMUST00000143234	1.03145	4.80356e-08	2.15075e-06	2.04408
A_51_P249930	Tceal1	ENSMUST00000055104	1.02689	2.46526e-06	4.74595e-05	2.03763
A_52_P603976	Jtb	ENSMUST00000029546	1.02456	1.7598e-08	9.62324e-07	2.03433
A_55_P1988310	Rnf183	ENSMUST00000107454	1.01966	0.000860938	0.0041124	2.02744
A_55_P2137701	Gm13247	ENSMUST00000179175	1.01823	0.000113972	0.000876706	2.02544
A_66_P118011	Rnf38	ENSMUST00000136730	1.01642	2.79856e-07	8.56217e-06	2.02289
A_52_P116628	8430419L09Rik	ENSMUST00000111915	1.01535	6.63442e-08	2.78259e-06	2.0214
A_51_P459108	Insl6	ENSMUST00000052380	1.01441	1.03777e-05	0.00014045	2.02007
A_52_P302433	Plau	ENSMUST00000022368	1.01234	1.18816e-06	2.7015e-05	2.01718
A_51_P430259	1700009P17Rik	ENSMUST00000143623	1.00916	2.65042e-07	8.23049e-06	2.01274
A_66_P100496	Speer4b	ENSMUST00000053257	1.00824	0.000201574	0.00135512	2.01145
A_51_P282557	C3ar1	ENSMUST00000042081	1.00626	4.20337e-07	1.16401e-05	2.00869
A_51_P312748	Oxsm	ENSMUST00000022311	1.00587	8.51123e-07	2.08202e-05	2.00815
A_52_P114260	C1rb	ENSMUST00000184647	1.00468	5.94968e-07	1.55209e-05	2.0065
A_51_P120093	Snx10	ENSMUST00000179365	1.00455	4.46397e-07	1.2283e-05	2.00631
A_55_P2115225	Fap	ENSMUST00000102732	1.00344	0.00755546	0.0217133	2.00477
A_55_P1970299	Mttp	ENSMUST00000098580	1.0017	5.8431e-05	0.000526977	2.00235
A_55_P1971867	Kctd11	ENSMUST00000050555	1.00145	2.92315e-05	0.000314286	2.00201
A_51_P517145	Sort1	ENSMUST00000102632	0.999991	3.65733e-06	6.3657e-05	1.99999
A_55_P2156293	Pcyox1	ENSMUST00000032065	0.99796	5.6371e-09	4.03183e-07	1.99717
A_55_P2061338	Slc16a11	ENSMUST00000171032	0.997519	4.41168e-06	7.29649e-05	1.99656
A_55_P2046877	Foxq1	ENSMUST00000042118	0.996635	1.64892e-05	0.000202137	1.99534
A_51_P433870	Vegfc	ENSMUST00000033919	0.996364	1.89757e-08	1.01706e-06	1.99497
A_52_P177373	Intu	ENSMUST00000091186	0.996086	2.98237e-07	9.0223e-06	1.99458
A_51_P164939	Tmem150a	ENSMUST00000069695	0.994844	4.49222e-09	3.4531e-07	1.99286
A_52_P266320	Akap17b		0.992895	6.65124e-07	1.69819e-05	1.99017
A_52_P504361	Naglu	ENSMUST00000001802	0.992581	5.65069e-08	2.4509e-06	1.98974
A_55_P2040600	Exd1	ENSMUST00000171024	0.991204	2.57989e-06	4.90542e-05	1.98784
A_55_P2005808	3110057O12Rik	ENSMUST00000108078	0.990107	3.89769e-05	0.000388689	1.98633
A_55_P2052370	Tia1	ENSMUST00000113712	0.98987	1.06621e-05	0.000143021	1.98601
A_55_P1952990	Myl6b	ENSMUST00000026428	0.989702	3.73409e-06	6.4525e-05	1.98577
A_55_P2089520	Col10a1	ENSMUST00000105511	0.989026	0.00238984	0.00897594	1.98484
A_52_P543079	Dhtkd1	ENSMUST00000155977	0.98826	1.83279e-06	3.78836e-05	1.98379
A_55_P2137611	Irgm2	ENSMUST00000058704	0.987417	4.16412e-06	6.9833e-05	1.98263
A_55_P2157914			0.982034	3.70668e-06	6.41647e-05	1.97525
A_55_P2051139	Zfp704	ENSMUST00000041124	0.981926	0.0643504	0.117515	1.9751
A_51_P487027	Kcnk2	ENSMUST00000110920	0.980383	0.000312631	0.0018958	1.97299
A_52_P512329	Zfp219	ENSMUST00000166169	0.979369	5.84455e-08	2.51981e-06	1.9716
A_51_P225793	Prr5l	ENSMUST00000043845	0.978274	3.03778e-07	9.13873e-06	1.97011
A_55_P1954006	Ldhb	ENSMUST00000032373	0.977588	1.74678e-07	5.85877e-06	1.96917
A_55_P2083919	Robo2	ENSMUST00000117785	0.975347	1.43384e-07	4.97926e-06	1.96611
A_55_P2059352	Col18a1	ENSMUST00000072755	0.974921	7.51947e-08	3.07615e-06	1.96553
A_51_P172502	Cxcl12	ENSMUST00000112871	0.974412	1.31791e-07	4.67946e-06	1.96484
A_52_P157170	Rnf157	ENSMUST00000100202	0.9744	5.91497e-06	9.23145e-05	1.96482
A_55_P2174884	Gm2016	ENSMUST00000110147	0.974262	1.3847e-07	4.87127e-06	1.96464
A_52_P228551	Gpr176	ENSMUST00000039160	0.972073	1.19265e-08	7.25669e-07	1.96166
A_51_P441286	Ttc5		0.971356	0.000732787	0.00362973	1.96068
A_52_P495162	Rrnad1	ENSMUST00000160074	0.971039	2.57407e-07	8.01366e-06	1.96025
A_65_P09285	2610524H06Rik	ENSMUST00000100850	0.97042	1.0562e-06	2.46904e-05	1.95941
A_51_P159612	Hebp2	ENSMUST00000020000	0.968699	1.05972e-07	3.94656e-06	1.95707
A_66_P108622	Gtpbp10	ENSMUST00000128887	0.96769	6.82845e-06	0.000102999	1.95571
A_55_P2094896	Phyhd1	ENSMUST00000147204	0.967558	3.15904e-05	0.000331239	1.95553
A_51_P175580	Trp53inp1	ENSMUST00000132010	0.966333	2.25684e-06	4.45185e-05	1.95387
A_55_P2003981			0.964493	2.65981e-05	0.000290896	1.95138
A_55_P2322620			0.963868	3.47094e-06	6.11346e-05	1.95053
A_55_P2141241	Mb21d1	ENSMUST00000127190	0.963804	0.000196234	0.0013304	1.95045
A_55_P2138041	Gon4l	ENSMUST00000090942	0.963544	9.5377e-08	3.64627e-06	1.95009
A_51_P157953	Soga3	ENSMUST00000092629	0.963115	5.0418e-06	8.11497e-05	1.94951
A_55_P1959595	Fmo5	ENSMUST00000029729	0.960495	3.15559e-09	2.64189e-07	1.94598
A_55_P2169888	D8Ertd82e	ENSMUST00000110492	0.960425	5.35736e-07	1.42687e-05	1.94588
A_55_P2086835			0.960222	1.02806e-07	3.86864e-06	1.94561
A_51_P122582	Daglb	ENSMUST00000045593	0.959848	8.86857e-08	3.44534e-06	1.94511
A_55_P2022743	Tenm3	ENSMUST00000033965	0.959659	2.39179e-05	0.000267722	1.94485
A_55_P1968723	Ccrn4l	ENSMUST00000023849	0.957764	8.8115e-08	3.43553e-06	1.9423
A_55_P2345425	Sat2	ENSMUST00000108656	0.95681	0.00069714	0.00349866	1.94101
A_55_P2148912	S100a16	ENSMUST00000127008	0.956089	2.64076e-08	1.35167e-06	1.94004
A_55_P1986282	Cdkn1a	ENSMUST00000119901	0.955957	2.65745e-07	8.23049e-06	1.93987
A_55_P2103452	Npy1r	ENSMUST00000039303	0.955086	8.67359e-06	0.000122933	1.9387
A_52_P610885	Naalad2	ENSMUST00000001826	0.953729	0.000113268	0.000872223	1.93687
A_55_P2087885	Mroh1	ENSMUST00000161683	0.953544	0.000585478	0.00305172	1.93662
A_55_P1988058	Tyw3	ENSMUST00000052774	0.95277	1.66468e-08	9.29125e-07	1.93559
A_55_P1986647	Podxl2	ENSMUST00000061262	0.951326	0.000740208	0.00365869	1.93365
A_52_P223127	Synpo2	ENSMUST00000184590	0.949619	0.00298519	0.0106385	1.93136
A_55_P2025454	Ttc12	ENSMUST00000055096	0.948709	3.56273e-06	6.24441e-05	1.93014
A_55_P2141088	Tenm4	ENSMUST00000107162	0.946776	2.42082e-06	4.67708e-05	1.92756
A_52_P613596	Vav3	ENSMUST00000046864	0.94605	8.18468e-08	3.26782e-06	1.92659
A_55_P2119969	Bdh2	ENSMUST00000120397	0.945267	6.92136e-09	4.7013e-07	1.92554
A_52_P417620	Pacs1	ENSMUST00000025786	0.945251	2.06155e-06	4.15388e-05	1.92552
A_55_P2095133	Synpo2	ENSMUST00000106427	0.944651	8.2202e-06	0.000117978	1.92472
A_65_P20174	Jade1	ENSMUST00000163764	0.942267	1.67997e-06	3.55062e-05	1.92155
A_52_P52618	Csf2rb	ENSMUST00000096355	0.942189	0.00195758	0.00769356	1.92144
A_55_P1974421	Itga3	ENSMUST00000001548	0.941244	1.47085e-08	8.47208e-07	1.92018
A_55_P2126473	Scn2a1	ENSMUST00000028377	0.940512	6.03257e-07	1.56923e-05	1.91921
A_51_P347961	Npc2	ENSMUST00000021668	0.939724	4.73113e-08	2.1424e-06	1.91816
A_51_P195374	Baiap2l1	ENSMUST00000055190	0.939544	1.03094e-06	2.42047e-05	1.91792
A_55_P2414524	LOC102634333		0.938845	1.77124e-07	5.92241e-06	1.91699
A_55_P2152771	Lhfpl2	ENSMUST00000118195	0.937475	1.4116e-07	4.92576e-06	1.91517
A_55_P1959923	Cth	ENSMUST00000129805	0.936672	5.94657e-06	9.25756e-05	1.91411
A_66_P110343	Snx10	ENSMUST00000114439	0.935844	8.658e-08	3.40643e-06	1.91301
A_52_P500578	8430419L09Rik	ENSMUST00000151951	0.934902	7.00782e-08	2.90535e-06	1.91176
A_51_P155085	Dennd2a	ENSMUST00000036877	0.934896	8.05581e-07	2.00236e-05	1.91175
A_55_P1953984	Gm11033		0.930528	1.92277e-07	6.32142e-06	1.90597
A_52_P141136	Fggy	ENSMUST00000147766	0.930331	1.23188e-07	4.45901e-06	1.90571
A_55_P2324886	D930027P08Rik		0.929596	1.19451e-05	0.000156562	1.90474
A_55_P2071286	Tmc4	ENSMUST00000121743	0.929525	0.000112041	0.000866172	1.90465
A_51_P433824	Tpi1	ENSMUST00000172132	0.928857	1.13262e-08	6.93048e-07	1.90377
A_66_P112006	H2-T10	ENSMUST00000174382	0.928028	8.76928e-08	3.43146e-06	1.90267
A_52_P286002	Obsl1	ENSMUST00000127507	0.9271	1.29636e-05	0.000167472	1.90145
A_51_P473940	Slc22a15	ENSMUST00000182130	0.926604	1.29406e-07	4.63545e-06	1.9008
A_51_P329322	Zfand1	ENSMUST00000125734	0.926123	1.62741e-07	5.52705e-06	1.90016
A_55_P2054663	Cox4i2	ENSMUST00000109821	0.925952	0.00135154	0.00582173	1.89994
A_51_P223315	Sh3glb1	ENSMUST00000163279	0.925246	2.0003e-06	4.05608e-05	1.89901
A_51_P293269	Pde7a	ENSMUST00000091314	0.925051	1.37469e-06	3.06116e-05	1.89875
A_55_P2078680	Tpm1	ENSMUST00000129466	0.923878	2.84929e-08	1.43796e-06	1.89721
A_55_P1974984			0.923763	3.24244e-06	5.79294e-05	1.89706
A_55_P2145691	Hlcs	ENSMUST00000099512	0.923046	1.62978e-06	3.47515e-05	1.89611
A_51_P384113	Acad12	ENSMUST00000041252	0.921729	7.03982e-06	0.000105451	1.89438
A_55_P2079732	Myo1h	ENSMUST00000169347	0.921712	2.78795e-07	8.55395e-06	1.89436
A_55_P2187225			0.921531	3.34409e-07	9.85436e-06	1.89412
A_51_P296249	Foxs1	ENSMUST00000099200	0.921324	1.1696e-06	2.66981e-05	1.89385
A_52_P533707	Chrna1	ENSMUST00000028515	0.920846	5.12704e-08	2.25548e-06	1.89323
A_51_P206251	Ahcyl1	ENSMUST00000029490	0.920537	1.11043e-06	2.56853e-05	1.89282
A_55_P2185323	Gmps	ENSMUST00000029405	0.919656	1.43143e-07	4.97888e-06	1.89166
A_55_P2078365	Rgs12	ENSMUST00000030984	0.919474	1.41336e-06	3.11834e-05	1.89143
A_52_P58181	Suclg2	ENSMUST00000079847	0.918328	1.23242e-07	4.45901e-06	1.88992
A_55_P2136121	9030617O03Rik	ENSMUST00000110070	0.917701	3.55572e-05	0.000364343	1.8891
A_51_P139184	Fank1	ENSMUST00000065359	0.917353	5.56742e-05	0.000506983	1.88865
A_55_P2068673	Stmn2	ENSMUST00000029002	0.917302	8.36636e-09	5.47833e-07	1.88858
A_52_P14453	Atxn1	ENSMUST00000180110	0.916801	3.35902e-06	5.96177e-05	1.88792
A_55_P2148684	Best1	ENSMUST00000117346	0.916751	0.0128071	0.03273	1.88786
A_51_P467505	Tec	ENSMUST00000073843	0.91593	1.61114e-06	3.44902e-05	1.88679
A_55_P2466575	4930402H24Rik	ENSMUST00000133132	0.915707	3.48668e-05	0.00035863	1.88649
A_55_P2019929	Ythdf3	ENSMUST00000108346	0.915441	1.32151e-07	4.67946e-06	1.88615
A_51_P175555	Pelo	ENSMUST00000109226	0.91328	2.88568e-07	8.76661e-06	1.88332
A_55_P2009213	Pde7a	ENSMUST00000156652	0.913278	2.06407e-06	4.15506e-05	1.88332
A_51_P220278	Ppp2r2b	ENSMUST00000025377	0.912635	2.65776e-06	5.0063e-05	1.88248
A_51_P507290	Klf5	ENSMUST00000005279	0.912531	1.85074e-07	6.13129e-06	1.88235
A_55_P1960916	Egln3	ENSMUST00000039516	0.912288	6.86461e-07	1.74647e-05	1.88203
A_55_P2006255	Txnip	ENSMUST00000128221	0.91222	2.58398e-05	0.000284041	1.88194
A_52_P354682	Elovl7	ENSMUST00000022207	0.910979	9.03849e-05	0.000735335	1.88032
A_51_P176912	Hlcs	ENSMUST00000099512	0.910687	3.2603e-06	5.81524e-05	1.87994
A_52_P635015	Gpr39	ENSMUST00000027581	0.910591	0.000177163	0.00123323	1.87982
A_55_P2168243			0.910374	6.39536e-09	4.41341e-07	1.87953
A_51_P354652	Slc25a30	ENSMUST00000022580	0.907316	5.71615e-06	8.98608e-05	1.87555
A_55_P2048378	Gm5595	ENSMUST00000107992	0.906639	1.93669e-07	6.35753e-06	1.87467
A_52_P114722	Ptpn6	ENSMUST00000171549	0.906614	5.10861e-08	2.25196e-06	1.87464
A_55_P2172227	Ubn2	ENSMUST00000159925	0.90624	4.55452e-06	7.46954e-05	1.87416
A_52_P83913	Ssx2ip	ENSMUST00000106153	0.905634	1.24892e-07	4.5036e-06	1.87337
A_51_P113178	Fam212b	ENSMUST00000066610	0.904633	1.48429e-07	5.11334e-06	1.87207
A_52_P640386	Usp53	ENSMUST00000090379	0.902907	2.56326e-07	8.00093e-06	1.86983
A_55_P2152567	Plekha5	ENSMUST00000087622	0.902289	7.97425e-07	1.99123e-05	1.86903
A_51_P448618	Slc16a10	ENSMUST00000092566	0.902193	0.000595883	0.00309586	1.86891
A_55_P2006296	Krt13	ENSMUST00000007275	0.901446	2.12166e-05	0.000243931	1.86794
A_55_P1971483	4932438A13Rik	ENSMUST00000057272	0.901395	5.12479e-05	0.000477341	1.86787
A_55_P1999908	Pip5k1a	ENSMUST00000107231	0.900342	1.70364e-07	5.73187e-06	1.86651
A_52_P597775	Gprc5a	ENSMUST00000050104	0.900081	7.088e-08	2.93297e-06	1.86617
A_52_P640204	Stam	ENSMUST00000131734	0.900029	1.71007e-06	3.5903e-05	1.8661
A_55_P1970675	Sh3yl1	ENSMUST00000128814	0.899571	8.17434e-05	0.000686492	1.86551
A_55_P2099560	Apobec1	ENSMUST00000112585	0.899482	4.22028e-08	1.94782e-06	1.8654
A_55_P2066116	Bcl3	ENSMUST00000120537	0.897455	1.37024e-05	0.000174924	1.86278
A_52_P5213	Chd1l	ENSMUST00000029730	0.897383	2.70875e-07	8.35843e-06	1.86268
A_51_P231630	Zfp239	ENSMUST00000172088	0.896944	1.38448e-06	3.07474e-05	1.86212
A_55_P1958840	Itga6	ENSMUST00000139760	0.896447	2.40457e-08	1.2337e-06	1.86148
A_55_P2018116	Pabpc4l	ENSMUST00000166505	0.895672	2.2979e-06	4.51032e-05	1.86048
A_55_P2101696	Gnat2	ENSMUST00000130013	0.894594	1.41739e-05	0.000179143	1.85909
A_55_P2429225	Psrc1	ENSMUST00000090561	0.893547	1.0012e-07	3.8007e-06	1.85774
A_55_P2115442	Clec2d	ENSMUST00000032260	0.892922	7.99259e-07	1.99123e-05	1.85693
A_51_P270733	Syngr1	ENSMUST00000009728	0.891425	1.68754e-06	3.56313e-05	1.85501
A_55_P2011220	Armcx1	ENSMUST00000113199	0.890626	3.23725e-08	1.57134e-06	1.85398
A_52_P361993	Zc2hc1a	ENSMUST00000051064	0.890585	4.11914e-06	6.91862e-05	1.85393
A_51_P265219	Ppm1k	ENSMUST00000042766	0.890257	1.31616e-07	4.67946e-06	1.85351
A_52_P62530	Sclt1	ENSMUST00000148769	0.88534	4.05832e-06	6.85377e-05	1.8472
A_55_P2014124	Gjb3	ENSMUST00000046532	0.885122	0.000335414	0.00200192	1.84692
A_52_P314129	Pkia	ENSMUST00000028999	0.884869	4.27634e-06	7.12173e-05	1.8466
A_52_P550049	Nfya	ENSMUST00000162460	0.883638	2.20763e-05	0.000251859	1.84502
A_51_P215438	Prodh	ENSMUST00000003620	0.882858	2.89484e-05	0.000312174	1.84403
A_51_P421876	Irf7	ENSMUST00000127223	0.882567	0.000432557	0.00243037	1.84365
A_51_P435198	Cryz	ENSMUST00000184537	0.88249	4.09867e-08	1.89981e-06	1.84355
A_52_P644114	Ccdc18	ENSMUST00000047677	0.882071	4.72618e-06	7.70457e-05	1.84302
A_51_P343309	Cmas	ENSMUST00000133248	0.881863	1.40147e-06	3.10161e-05	1.84275
A_52_P172563	Dffa	ENSMUST00000030816	0.880297	2.28969e-05	0.000258533	1.84075
A_52_P656699	Actn3	ENSMUST00000006626	0.879496	2.53758e-05	0.000279794	1.83973
A_52_P137378	Prkaa2	ENSMUST00000030243	0.87904	4.80134e-06	7.79918e-05	1.83915
A_51_P435321	Ap1s2	ENSMUST00000112294	0.877586	1.27983e-06	2.88183e-05	1.8373
A_52_P594756	Asb4	ENSMUST00000043294	0.876963	0.00120451	0.00533801	1.83651
A_52_P451644	Ndn	ENSMUST00000038775	0.876773	3.21219e-08	1.56976e-06	1.83626
A_55_P2290443	Htr1b	ENSMUST00000183482	0.876614	5.06924e-05	0.000473597	1.83606
A_51_P487813	Lxn	ENSMUST00000160827	0.876587	8.04944e-08	3.23175e-06	1.83603
A_52_P681391	G0s2	ENSMUST00000009777	0.876503	1.66368e-07	5.62224e-06	1.83592
A_52_P217710	Fzd6	ENSMUST00000022906	0.875906	0.000189197	0.00129202	1.83516
A_52_P231635	Oxsm	ENSMUST00000112624	0.875485	1.58488e-06	3.40632e-05	1.83462
A_55_P2091196	Hrct1	ENSMUST00000095109	0.875262	2.50422e-07	7.86209e-06	1.83434
A_51_P197259	Cct7	ENSMUST00000032078	0.874717	9.21164e-08	3.54673e-06	1.83365
A_55_P2002129	Rgs12	ENSMUST00000030984	0.874304	6.55069e-06	9.97145e-05	1.83312
A_51_P406583	Myo1e	ENSMUST00000034745	0.873868	6.11386e-07	1.57777e-05	1.83257
A_55_P2048767	Efemp1	ENSMUST00000020759	0.873754	3.13167e-06	5.65438e-05	1.83242
A_52_P634447	Hs1bp3	ENSMUST00000020927	0.873673	2.2155e-07	7.07913e-06	1.83232
A_55_P2176585	Donson	ENSMUST00000133942	0.871645	1.79881e-06	3.736e-05	1.82975
A_52_P553316	Snrk	ENSMUST00000118886	0.871274	1.11428e-05	0.000148387	1.82928
A_55_P2141084	Tenm4	ENSMUST00000107162	0.870838	2.876e-06	5.29769e-05	1.82873
A_51_P244061	Snapc5	ENSMUST00000034965	0.870639	1.72377e-08	9.49832e-07	1.82847
A_55_P2110136	Arhgap29	ENSMUST00000127177	0.870638	4.52438e-08	2.07048e-06	1.82847
A_55_P2104487	Pld1	ENSMUST00000067757	0.870192	1.33485e-07	4.70355e-06	1.82791
A_55_P1994047			0.869536	2.93532e-08	1.47106e-06	1.82707
A_55_P2031989	Rin2	ENSMUST00000094480	0.869371	2.36839e-06	4.61009e-05	1.82687
A_51_P232901	Cnp	ENSMUST00000150414	0.868783	6.40587e-08	2.69721e-06	1.82612
A_55_P2166572	Strbp	ENSMUST00000028279	0.868501	9.83795e-06	0.000135523	1.82577
A_55_P2035559	Strip1	ENSMUST00000064759	0.868286	3.9882e-05	0.000395161	1.82549
A_52_P372013	Zfp9	ENSMUST00000161170	0.86751	3.71155e-05	0.000374624	1.82451
A_55_P1973046	Cttnbp2nl	ENSMUST00000077548	0.866809	9.17839e-08	3.54023e-06	1.82363
A_55_P1971672	Ankrd50	ENSMUST00000120875	0.865745	1.44674e-05	0.000182001	1.82228
A_55_P2124791	Col18a1	ENSMUST00000072755	0.865272	8.38963e-08	3.33006e-06	1.82168
A_51_P321374	Ppapdc3	ENSMUST00000146502	0.864818	1.6286e-06	3.47515e-05	1.82111
A_55_P1967196	Lamb3	ENSMUST00000159955	0.864552	4.82182e-06	7.82503e-05	1.82077
A_55_P2024595	Atxn7l1	ENSMUST00000090597	0.864294	9.64329e-05	0.000770607	1.82045
A_55_P2046149	Kremen1	ENSMUST00000020662	0.864184	4.1411e-06	6.9501e-05	1.82031
A_55_P2088131	Gm5595	ENSMUST00000107992	0.864037	5.71502e-07	1.50359e-05	1.82012
A_52_P144037	Gcc1	ENSMUST00000064377	0.864016	0.00161676	0.00665282	1.8201
A_52_P387009	Egln3	ENSMUST00000039516	0.862433	3.32672e-07	9.81656e-06	1.8181
A_51_P106259	Camk1	ENSMUST00000149497	0.861711	1.51999e-07	5.21968e-06	1.81719
A_55_P2119493	Gstcd	ENSMUST00000080583	0.861368	0.000758089	0.00372831	1.81676
A_52_P575771	Mtfr1	ENSMUST00000029129	0.86029	6.19744e-08	2.64547e-06	1.8154
A_55_P2173702	Ebpl	ENSMUST00000022494	0.859676	3.30113e-07	9.76771e-06	1.81463
A_55_P2026753	Zmat1	ENSMUST00000064659	0.859137	1.66559e-06	3.52822e-05	1.81395
A_55_P2097048			0.858676	1.1937e-06	2.7084e-05	1.81337
A_51_P207940	Tmem117	ENSMUST00000080141	0.857768	1.01155e-06	2.38979e-05	1.81223
A_55_P2094084	Zfp318	ENSMUST00000138127	0.856999	9.45925e-08	3.62913e-06	1.81127
A_55_P2004248	Apcdd1	ENSMUST00000096554	0.856007	9.59117e-05	0.000767577	1.81002
A_52_P601980	Kdm5b	ENSMUST00000047714	0.855402	4.02939e-06	6.81983e-05	1.80926
A_52_P664699	Cul1	ENSMUST00000146200	0.854696	1.72111e-06	3.60581e-05	1.80838
A_55_P1965892	Gnpda1	ENSMUST00000063814	0.854307	1.54607e-07	5.28402e-06	1.80789
A_51_P328300	Pdia4	ENSMUST00000077290	0.853164	0.000234043	0.00151357	1.80646
A_52_P530291	Pim1	ENSMUST00000024811	0.8526	1.42957e-06	3.13946e-05	1.80575
A_51_P257550	Marcksl1	ENSMUST00000062356	0.851681	6.13043e-06	9.47868e-05	1.8046
A_51_P475342	Chrnb1	ENSMUST00000045971	0.850942	2.36908e-06	4.61009e-05	1.80368
A_66_P120736	Bnip3	ENSMUST00000106112	0.850528	4.60188e-07	1.25824e-05	1.80316
A_52_P78023	Limd2	ENSMUST00000045923	0.85036	1.84933e-05	0.000219602	1.80295
A_52_P354390	Snrpn	ENSMUST00000098402	0.848994	6.77066e-06	0.000102342	1.80124
A_52_P138205	Plekha8	ENSMUST00000119706	0.848938	9.80171e-06	0.000135282	1.80117
A_55_P2095814	Kalrn	ENSMUST00000089655	0.848702	3.61946e-05	0.000367992	1.80088
A_51_P362538	Syde2	ENSMUST00000039517	0.847899	9.75408e-05	0.00077716	1.79988
A_55_P2039125	Fam219a	ENSMUST00000108052	0.847526	1.28256e-05	0.000165988	1.79941
A_55_P2081105	AI607873	ENSMUST00000042610	0.847326	0.00126886	0.00554134	1.79916
A_51_P211573	Wdr47	ENSMUST00000051145	0.84688	3.77287e-07	1.07512e-05	1.79861
A_52_P269016	Nek9	ENSMUST00000040992	0.844989	1.80227e-08	9.80578e-07	1.79625
A_51_P365399	Smg5	ENSMUST00000001451	0.844878	2.83535e-08	1.43428e-06	1.79611
A_51_P513568	Stx11	ENSMUST00000042861	0.84452	2.96382e-06	5.42329e-05	1.79567
A_55_P1985089	Fam171a2	ENSMUST00000049057	0.844329	8.14424e-06	0.000117277	1.79543
A_55_P2121215	Clcc1	ENSMUST00000106613	0.843125	4.64912e-05	0.000443751	1.79393
A_66_P106503	Gm2022	ENSMUST00000110147	0.842799	1.14262e-05	0.000150952	1.79353
A_52_P632191	Nfx1	ENSMUST00000098143	0.841952	2.43399e-05	0.00027128	1.79247
A_55_P2091473	Bnip3	ENSMUST00000106112	0.841929	1.42965e-06	3.13946e-05	1.79244
A_65_P07038	Ddx20	ENSMUST00000132008	0.839926	8.29516e-05	0.000692064	1.78996
A_55_P2005783	Ifih1	ENSMUST00000112459	0.839575	0.000259319	0.0016418	1.78952
A_52_P317923	Zfp948	ENSMUST00000088787	0.838649	1.68938e-05	0.000205696	1.78838
A_55_P2180744	Clstn3	ENSMUST00000008297	0.838587	1.16252e-05	0.00015302	1.7883
A_55_P2032147	Wnt9a	ENSMUST00000000128	0.837755	3.28498e-06	5.84959e-05	1.78727
A_51_P424959	Bcl6b	ENSMUST00000000326	0.836188	1.60486e-06	3.43898e-05	1.78533
A_55_P2183404	Ptn	ENSMUST00000101534	0.83613	9.17938e-06	0.000128833	1.78525
A_51_P327751	Ifit1	ENSMUST00000102824	0.836081	1.5499e-05	0.00019185	1.78519
A_55_P2043108	Exoc4	ENSMUST00000139132	0.835217	2.87325e-06	5.29769e-05	1.78413
A_55_P2011387	Tifa	ENSMUST00000171621	0.83479	5.54792e-05	0.00050606	1.7836
A_52_P515247	Arhgdib	ENSMUST00000111892	0.83449	1.35469e-06	3.01975e-05	1.78323
A_66_P104815	Ecm1	ENSMUST00000117507	0.833721	1.2653e-05	0.00016412	1.78228
A_51_P351394	Vps45	ENSMUST00000015891	0.832669	5.02578e-08	2.22452e-06	1.78098
A_52_P597461	Skil	ENSMUST00000118204	0.832284	1.00431e-05	0.000137468	1.7805
A_66_P104442	Cog6	ENSMUST00000036665	0.832045	1.55396e-06	3.35992e-05	1.78021
A_55_P2069093		ENSMUST00000162998	0.832039	8.43266e-05	0.000699487	1.7802
A_66_P114784	Pla2g7	ENSMUST00000167418	0.831987	0.000170056	0.00119415	1.78013
A_55_P2167025	Pvrl2	ENSMUST00000075447	0.831538	2.83715e-06	5.24679e-05	1.77958
A_55_P2040529	Mtfr1	ENSMUST00000117529	0.830256	1.82842e-07	6.07598e-06	1.778
A_52_P16877	Tmcc3	ENSMUST00000121471	0.830044	6.09284e-07	1.57721e-05	1.77774
A_51_P214251	Rnls	ENSMUST00000096114	0.829996	0.000424231	0.00239628	1.77768
A_55_P2182433	Atg10	ENSMUST00000022119	0.829828	5.2331e-05	0.000484297	1.77747
A_52_P526396	Atl1	ENSMUST00000021466	0.829689	1.54014e-07	5.2721e-06	1.7773
A_55_P2026233	Uba7	ENSMUST00000176858	0.829561	0.000179055	0.0012416	1.77714
A_52_P231063	Carf	ENSMUST00000180952	0.828952	0.000686494	0.00345728	1.77639
A_55_P2002351	Lats2	ENSMUST00000077981	0.828114	5.4193e-06	8.59871e-05	1.77536
A_55_P2050902	Fetub	ENSMUST00000167399	0.827854	3.83418e-06	6.59381e-05	1.77504
A_52_P31543	Btg2	ENSMUST00000020692	0.827727	4.86911e-05	0.00045992	1.77489
A_51_P242591	Shq1	ENSMUST00000170667	0.827552	1.13155e-05	0.000150131	1.77467
A_52_P423810	Mt1		0.827069	1.04329e-05	0.000140844	1.77408
A_51_P275101	Chst11	ENSMUST00000040110	0.826239	4.11519e-06	6.91736e-05	1.77306
A_52_P264790	Pdgfd	ENSMUST00000168039	0.826134	3.29653e-05	0.000343157	1.77293
A_66_P133270	Mfsd1	ENSMUST00000029344	0.825815	3.02956e-05	0.000322198	1.77254
A_55_P2169445	Mfsd6	ENSMUST00000156876	0.825107	5.14364e-05	0.000477973	1.77167
A_66_P137605	Mb21d1	ENSMUST00000070742	0.824445	1.05276e-05	0.000141856	1.77085
A_55_P2174506	Stx17	ENSMUST00000064765	0.824432	5.17627e-06	8.26979e-05	1.77084
A_55_P1953172	Foxn1	ENSMUST00000108294	0.823626	2.11929e-05	0.000243882	1.76985
A_55_P1952220	Pnpo	ENSMUST00000153896	0.823597	4.03255e-08	1.88127e-06	1.76981
A_55_P2083619	Rab8b	ENSMUST00000041139	0.822363	0.000154973	0.00111395	1.7683
A_55_P1982319	Ndst3	ENSMUST00000029602	0.82229	0.000117999	0.000899672	1.76821
A_55_P2037425	Gapdh	ENSMUST00000118875	0.822193	1.02081e-05	0.000139113	1.76809
A_52_P168271	Spg20	ENSMUST00000107971	0.821799	2.55963e-07	8.00093e-06	1.76761
A_55_P1981479	Irgm1	ENSMUST00000097271	0.821387	7.3948e-06	0.000109253	1.7671
A_51_P392429	Mrgpre	ENSMUST00000054048	0.821382	3.6914e-07	1.06171e-05	1.7671
A_55_P2112484	Rwdd3	ENSMUST00000106465	0.82126	6.7576e-05	0.000593109	1.76695
A_55_P2014169	Ppa2	ENSMUST00000029644	0.820813	1.82354e-05	0.000217375	1.7664
A_52_P120803	Ankrd1	ENSMUST00000025718	0.819483	3.90047e-07	1.1042e-05	1.76477
A_51_P109369	Fbxo32	ENSMUST00000022986	0.818832	2.18905e-05	0.000249912	1.76398
A_55_P2035554	Strip1	ENSMUST00000064759	0.818456	2.63947e-06	4.9967e-05	1.76352
A_51_P442097	Slc41a3	ENSMUST00000044019	0.817906	6.23401e-08	2.64547e-06	1.76285
A_52_P668478	Rhbdd2	ENSMUST00000043707	0.817023	1.15005e-06	2.63972e-05	1.76177
A_52_P655663	H13	ENSMUST00000125366	0.816583	3.55272e-07	1.03005e-05	1.76123
A_52_P671062	Uba6	ENSMUST00000039373	0.815793	9.1864e-06	0.000128848	1.76027
A_52_P556462	Fancd2	ENSMUST00000036340	0.814548	0.000242696	0.00155648	1.75875
A_55_P1966204	Cxcl12	ENSMUST00000112866	0.813073	2.50976e-06	4.80167e-05	1.75695
A_55_P1977498	Htr2b	ENSMUST00000027431	0.813061	2.05184e-05	0.000238023	1.75693
A_51_P406557	AI464131	ENSMUST00000054920	0.812037	7.35987e-08	3.02806e-06	1.75569
A_55_P2055819	Adam15	ENSMUST00000148068	0.810506	1.20145e-06	2.72311e-05	1.75383
A_55_P2108081			0.81047	0.000124858	0.000943315	1.75378
A_55_P2044207	Bphl	ENSMUST00000040656	0.809894	1.83731e-05	0.000218534	1.75308
A_51_P464308	Gnb4	ENSMUST00000184130	0.809722	9.1017e-08	3.51694e-06	1.75287
A_55_P2152936	Nol4	ENSMUST00000097652	0.809046	8.44361e-05	0.000699854	1.75205
A_55_P2054927	Fam136a	ENSMUST00000071492	0.808773	5.50366e-07	1.46043e-05	1.75172
A_55_P2005868	Bbs7	ENSMUST00000040148	0.808713	3.94218e-06	6.73132e-05	1.75165
A_51_P419017	Pde10a	ENSMUST00000115717	0.808402	2.25349e-06	4.4493e-05	1.75127
A_55_P2040455	Ano10	ENSMUST00000042546	0.808299	4.80227e-06	7.79918e-05	1.75115
A_55_P2027930	Nfx1	ENSMUST00000098143	0.80813	1.76374e-06	3.68031e-05	1.75094
A_55_P2001773	Copg2	ENSMUST00000048774	0.807664	6.23346e-07	1.60098e-05	1.75037
A_51_P431737	Cth	ENSMUST00000129805	0.806078	2.74172e-06	5.11471e-05	1.74845
A_52_P463977	Tmem140	ENSMUST00000074949	0.80576	2.01421e-06	4.06988e-05	1.74807
A_52_P481182	Stard5	ENSMUST00000075418	0.805197	5.23294e-06	8.34797e-05	1.74738
A_51_P168695	Mast4	ENSMUST00000167058	0.804141	1.8833e-07	6.2296e-06	1.74611
A_51_P514961	Tiparp	ENSMUST00000047906	0.804134	2.19665e-07	7.03972e-06	1.7461
A_51_P362161	Ubqln4	ENSMUST00000008748	0.80371	1.13649e-06	2.6143e-05	1.74558
A_51_P331385	Paip2b	ENSMUST00000058383	0.803562	4.10734e-07	1.14624e-05	1.74541
A_51_P337675	Cd53	ENSMUST00000038845	0.803194	0.000216918	0.00142892	1.74496
A_55_P2241299	Otud7b	ENSMUST00000090785	0.803073	5.537e-05	0.000505321	1.74481
A_52_P452569	Kirrel	ENSMUST00000041732	0.802599	1.64441e-07	5.5673e-06	1.74424
A_55_P1953899	Mccc1	ENSMUST00000029259	0.801921	1.55028e-06	3.35532e-05	1.74342
A_51_P442206	Ankrd42	ENSMUST00000126305	0.801234	4.80112e-05	0.000455642	1.74259
A_51_P334789	Nudt16	ENSMUST00000035179	0.798784	1.64336e-07	5.5673e-06	1.73963
A_55_P2026903	Tigit	ENSMUST00000096065	0.798604	0.000200544	0.00135072	1.73942
A_55_P2082961	Fnbp1l	ENSMUST00000162409	0.796416	1.70741e-06	3.5903e-05	1.73678
A_55_P2128944	Bcl2l13	ENSMUST00000009256	0.7944	0.000778494	0.00380526	1.73436
A_55_P2083929	Robo2	ENSMUST00000149114	0.794346	1.38728e-05	0.000176474	1.73429
A_55_P1960261	Gm608	ENSMUST00000169582	0.793385	0.00108475	0.00492755	1.73314
A_55_P2015860	Plcg1	ENSMUST00000017077	0.792561	1.5882e-06	3.41005e-05	1.73215
A_55_P1957413	Lsp1	ENSMUST00000149521	0.792194	7.94301e-05	0.000670715	1.73171
A_55_P1987694	Ptprd	ENSMUST00000084467	0.792016	8.3118e-07	2.04308e-05	1.73149
A_51_P122425	Ctf1	ENSMUST00000047393	0.791139	3.56234e-08	1.70613e-06	1.73044
A_51_P346668	Irf5	ENSMUST00000163511	0.79089	1.67052e-06	3.5341e-05	1.73014
A_51_P392705	Xpc	ENSMUST00000032182	0.790848	3.72168e-07	1.06616e-05	1.73009
A_51_P515777	Zfp516	ENSMUST00000171238	0.790566	7.7609e-05	0.000658944	1.72975
A_52_P337427	Izumo4	ENSMUST00000095426	0.790073	2.17184e-06	4.31968e-05	1.72916
A_51_P181517	Fcgr4	ENSMUST00000078825	0.78957	3.19345e-06	5.74343e-05	1.72856
A_55_P2185890	Cfh		0.788776	0.00466993	0.0149815	1.72761
A_51_P110081	Dmrta2	ENSMUST00000061187	0.787348	3.91206e-05	0.000389111	1.7259
A_52_P110812	Ggcx	ENSMUST00000065906	0.786763	8.37305e-05	0.000696876	1.7252
A_51_P350403	Exoc4	ENSMUST00000052266	0.785977	2.74943e-06	5.11522e-05	1.72426
A_52_P582112	Hcfc1r1	ENSMUST00000024697	0.785806	1.11065e-06	2.56853e-05	1.72406
A_51_P143682	Zfp318	ENSMUST00000138127	0.785628	5.16534e-07	1.37913e-05	1.72384
A_51_P294340	Commd8	ENSMUST00000013693	0.785422	3.55953e-06	6.24441e-05	1.7236
A_55_P1975742	Dap3	ENSMUST00000090938	0.784506	6.05471e-07	1.5719e-05	1.7225
A_55_P2139181	Cald1	ENSMUST00000149009	0.783919	1.136e-06	2.6143e-05	1.7218
A_51_P127738	Scn2a1	ENSMUST00000028377	0.783585	9.58435e-07	2.28253e-05	1.7214
A_55_P2124553	Cep41	ENSMUST00000140252	0.783536	9.46347e-07	2.26369e-05	1.72134
A_55_P2020148	Zfp239	ENSMUST00000112857	0.782628	8.24962e-05	0.000689568	1.72026
A_55_P2020050	6720475J19Rik		0.782566	9.34664e-06	0.000130418	1.72019
A_55_P2027879	Fbf1	ENSMUST00000106435	0.782088	5.43781e-05	0.000498258	1.71962
A_51_P338485	Aldh6a1	ENSMUST00000085192	0.781939	2.08387e-05	0.00024109	1.71944
A_55_P2053850	LOC102632427		0.78133	1.15121e-06	2.63972e-05	1.71871
A_52_P565279	Cecr5	ENSMUST00000075303	0.781048	4.38582e-05	0.000426153	1.71838
A_51_P364657	Rnf32	ENSMUST00000168460	0.780894	3.96996e-05	0.000393536	1.71819
A_51_P520936	Bcar3	ENSMUST00000029766	0.780886	7.19132e-06	0.000106756	1.71819
A_55_P2207186	Slc30a7	ENSMUST00000067485	0.780739	1.88339e-05	0.000222423	1.71801
A_51_P250797	Glrb	ENSMUST00000029654	0.780606	1.73186e-05	0.000209922	1.71785
A_52_P17098	Mpp7	ENSMUST00000115869	0.780357	4.10261e-05	0.000405011	1.71756
A_55_P2000409	Rab44	ENSMUST00000087942	0.779852	0.000381955	0.00221661	1.71695
A_55_P1952779	Dcp1b	ENSMUST00000149651	0.779842	0.000675102	0.00341504	1.71694
A_52_P106285	Rnf157	ENSMUST00000106398	0.779775	0.000520706	0.00279366	1.71686
A_55_P2042823	Sh3bp2	ENSMUST00000067638	0.779008	6.63074e-06	0.000100508	1.71595
A_52_P138777	Gpr63	ENSMUST00000038920	0.778709	0.00101536	0.00467712	1.71559
A_52_P590535	Fbln2	ENSMUST00000137029	0.777132	0.000298399	0.00182901	1.71372
A_55_P2004071	Ube2h	ENSMUST00000102993	0.776965	1.07072e-05	0.000143442	1.71352
A_55_P2170737	Igf2bp2	ENSMUST00000134188	0.776672	3.02632e-06	5.50703e-05	1.71317
A_55_P2137309	Kctd11	ENSMUST00000050555	0.776496	7.19952e-08	2.96774e-06	1.71297
A_52_P641922	Nhlrc3	ENSMUST00000056749	0.776046	6.83554e-06	0.000103034	1.71243
A_52_P112591		ENSMUST00000103740	0.77554	0.000137437	0.00101735	1.71183
A_55_P2002944	Fam160a1	ENSMUST00000094148	0.775367	0.00824349	0.0232605	1.71163
A_55_P1971774	Fsip1	ENSMUST00000028821	0.775351	0.000817118	0.00394672	1.71161
A_55_P1979973	Nuak2	ENSMUST00000072177	0.775133	0.000211609	0.00140164	1.71135
A_51_P417876	Smyd5	ENSMUST00000045693	0.774642	2.20018e-06	4.364e-05	1.71077
A_55_P2032823	Trim2	ENSMUST00000107693	0.774424	8.5331e-05	0.000705647	1.71051
A_52_P532973	Pxn	ENSMUST00000086523	0.773723	0.000158928	0.0011352	1.70968
A_52_P222354	Vps13c	ENSMUST00000077879	0.773465	3.15394e-05	0.000331239	1.70937
A_52_P246889	Chmp3	ENSMUST00000059462	0.77273	1.79188e-07	5.97293e-06	1.7085
A_55_P2046753	Piwil4	ENSMUST00000076946	0.772144	0.000544897	0.0028897	1.70781
A_51_P233928	B4galnt1	ENSMUST00000006914	0.77177	9.01759e-07	2.17875e-05	1.70736
A_55_P2090484	Pde10a	ENSMUST00000115717	0.771766	4.3252e-07	1.19164e-05	1.70736
A_52_P502838	Mgat5	ENSMUST00000038361	0.771673	6.7814e-05	0.000594714	1.70725
A_52_P451073	Tnfrsf21	ENSMUST00000024708	0.771478	9.5321e-06	0.000132663	1.70702
A_52_P543792	Qrich1	ENSMUST00000006851	0.770363	2.55034e-05	0.000280915	1.7057
A_51_P327983	4833427G06Rik	ENSMUST00000170947	0.770284	2.56107e-07	8.00093e-06	1.70561
A_51_P234864	Sfxn5	ENSMUST00000045846	0.769977	2.96524e-06	5.42329e-05	1.70524
A_52_P87964	Pla2g12a	ENSMUST00000029629	0.769969	8.37665e-06	0.000119658	1.70523
A_51_P417720	Itga11	ENSMUST00000034774	0.769932	0.00263904	0.00968454	1.70519
A_51_P463846	Gbp7	ENSMUST00000045097	0.769666	0.000375411	0.00219159	1.70487
A_51_P308298	Myl9	ENSMUST00000088552	0.769387	7.08428e-07	1.79391e-05	1.70455
A_55_P2106801	Bglap3	ENSMUST00000107543	0.769274	8.21693e-05	0.00068841	1.70441
A_51_P264527	Fam69b	ENSMUST00000074240	0.76887	3.14163e-07	9.40118e-06	1.70393
A_55_P2150876	Als2cr12	ENSMUST00000055313	0.768702	0.0011962	0.00531099	1.70374
A_55_P2139256	Rps6ka1	ENSMUST00000003741	0.768649	0.00117867	0.00525586	1.70367
A_55_P2059527	Gon4l	ENSMUST00000090942	0.76822	1.38259e-05	0.00017598	1.70317
A_55_P2087013	Hipk1	ENSMUST00000029438	0.7681	9.84806e-06	0.000135576	1.70303
A_51_P508029	Pcyox1	ENSMUST00000032065	0.768037	3.05206e-06	5.54454e-05	1.70295
A_52_P276955	Epha3	ENSMUST00000064405	0.767905	2.7723e-05	0.000300913	1.7028
A_55_P1960828	Slc16a13	ENSMUST00000060010	0.767889	3.14362e-07	9.40118e-06	1.70278
A_55_P2066274			0.767833	8.40223e-08	3.33006e-06	1.70271
A_55_P1977766	Ttc14		0.76778	0.000977903	0.00454154	1.70265
A_55_P2173188	Kank3	ENSMUST00000048560	0.766877	4.55807e-05	0.000437186	1.70158
A_51_P258766	Smo	ENSMUST00000001812	0.766855	5.88695e-07	1.53944e-05	1.70156
A_52_P520564	Wasl	ENSMUST00000031695	0.765686	0.000138975	0.00102571	1.70018
A_51_P187842	Eif4e3	ENSMUST00000032151	0.765243	6.26201e-05	0.000557541	1.69966
A_55_P2081178	Msl3l2	ENSMUST00000063138	0.764968	2.61118e-06	4.9562e-05	1.69933
A_52_P606826	Pigh	ENSMUST00000072154	0.76485	2.34269e-05	0.000263415	1.69919
A_55_P2132932	Mageb1	ENSMUST00000099471	0.764229	2.2968e-06	4.51032e-05	1.69846
A_52_P494372	Zxdc	ENSMUST00000075117	0.764031	2.56849e-05	0.000282481	1.69823
A_55_P2059159	Zfp111	ENSMUST00000073833	0.764001	1.92689e-05	0.000225935	1.69819
A_51_P396273	Nras	ENSMUST00000029445	0.763984	1.58088e-06	3.4011e-05	1.69817
A_55_P2074631	Cpeb1	ENSMUST00000178892	0.763631	1.52223e-05	0.000188966	1.69776
A_55_P2040011	Itga7	ENSMUST00000099112	0.762146	4.59998e-07	1.25824e-05	1.69601
A_55_P2031999	9030617O03Rik	ENSMUST00000167322	0.761902	3.04405e-06	5.53464e-05	1.69573
A_51_P224564	Ppm1f	ENSMUST00000027373	0.761891	9.77815e-08	3.73159e-06	1.69571
A_52_P146513	Speer4b	ENSMUST00000124535	0.761732	0.00121019	0.00535327	1.69553
A_55_P2060592	Hoxa1	ENSMUST00000000964	0.761096	4.54118e-06	7.4536e-05	1.69478
A_51_P419759	Tha1	ENSMUST00000153989	0.76098	0.000177892	0.00123711	1.69464
A_51_P339344	Tmem81	ENSMUST00000058167	0.760474	3.5825e-05	0.000365872	1.69405
A_55_P1953419	Rab13	ENSMUST00000065418	0.760159	1.02179e-05	0.000139127	1.69368
A_51_P327632	Igsf3	ENSMUST00000043983	0.760145	1.17051e-06	2.66981e-05	1.69366
A_55_P2011300	Fggy	ENSMUST00000176840	0.760122	5.90215e-05	0.000530608	1.69363
A_55_P2100700	Pygo2	ENSMUST00000060061	0.760098	2.9297e-06	5.38107e-05	1.69361
A_55_P1999324	Nudt6	ENSMUST00000052645	0.759429	2.29901e-06	4.51032e-05	1.69282
A_51_P118132	Skil	ENSMUST00000029194	0.759415	2.35093e-07	7.46766e-06	1.6928
A_52_P671625	Trim45	ENSMUST00000134993	0.759177	2.76961e-06	5.14833e-05	1.69252
A_52_P677956	Pex11g	ENSMUST00000004686	0.759026	1.74523e-06	3.65281e-05	1.69235
A_55_P2106803	Bglap2	ENSMUST00000098956	0.758306	2.70245e-05	0.000294962	1.6915
A_55_P2075424	Ttll7	ENSMUST00000170055	0.758262	2.48108e-07	7.81638e-06	1.69145
A_55_P2143204	Pbxip1	ENSMUST00000038942	0.758026	3.56709e-07	1.03253e-05	1.69117
A_66_P129085	C2cd3	ENSMUST00000156559	0.758008	0.000208245	0.00138616	1.69115
A_51_P199382	Elmo2	ENSMUST00000071699	0.757757	0.000183313	0.00126467	1.69086
A_55_P2115087	Mast4	ENSMUST00000167058	0.757053	8.34392e-06	0.000119357	1.69004
A_51_P391276	Gdi1	ENSMUST00000137447	0.756973	6.54701e-06	9.97145e-05	1.68994
A_51_P349495	Mboat1	ENSMUST00000047311	0.756278	2.82129e-06	5.2264e-05	1.68913
A_51_P240019	Gyg	ENSMUST00000178328	0.756216	2.69656e-07	8.33271e-06	1.68906
A_52_P45797	Trmt10a	ENSMUST00000162864	0.755566	3.57838e-05	0.000365872	1.68829
A_51_P375533	Polr3b	ENSMUST00000077175	0.755156	4.55337e-07	1.24813e-05	1.68781
A_55_P1978052	Pet112	ENSMUST00000029726	0.754898	5.32807e-05	0.000491345	1.68751
A_51_P146044	Ccdc92	ENSMUST00000036206	0.754684	1.69481e-06	3.5715e-05	1.68726
A_51_P295237	Lrp11	ENSMUST00000019931	0.754598	3.99001e-07	1.12701e-05	1.68716
A_51_P290921	Sytl2	ENSMUST00000098310	0.754591	1.61366e-06	3.451e-05	1.68715
A_51_P259975	Aspa	ENSMUST00000184572	0.753821	4.0792e-06	6.87588e-05	1.68625
A_55_P2132781	Slc16a2	ENSMUST00000042664	0.753679	0.0117326	0.0305735	1.68609
A_55_P1984173	Pde4dip	ENSMUST00000045243	0.752321	1.02285e-06	2.40933e-05	1.6845
A_55_P2129286	Zc3hc1	ENSMUST00000080812	0.75221	1.57397e-06	3.39177e-05	1.68437
A_55_P2138960	Tpk1	ENSMUST00000114644	0.751772	2.6658e-06	5.0076e-05	1.68386
A_55_P2065364	Tdrkh	ENSMUST00000045245	0.751118	4.19496e-06	7.01324e-05	1.6831
A_55_P2071811	Eml2	ENSMUST00000148246	0.750627	3.50209e-07	1.01948e-05	1.68252
A_55_P2034903	Socs6	ENSMUST00000070116	0.75036	7.23558e-06	0.000107267	1.68221
A_52_P235102	Gm5595	ENSMUST00000107992	0.749992	4.72395e-07	1.28188e-05	1.68178
A_51_P494481	Snx30	ENSMUST00000145199	0.749931	0.000370513	0.00217003	1.68171
A_55_P2056241	Pdlim5	ENSMUST00000029941	0.749724	6.93886e-07	1.76329e-05	1.68147
A_55_P2190299	Fggy	ENSMUST00000142384	0.749035	4.44527e-06	7.3296e-05	1.68067
A_51_P137111	Chek2	ENSMUST00000066160	0.748962	2.39276e-05	0.000267722	1.68058
A_55_P2047753	Tec	ENSMUST00000113594	0.748367	1.4981e-05	0.000186507	1.67989
A_52_P642626	Rbm20	ENSMUST00000095969	0.747817	2.32574e-06	4.55448e-05	1.67925
A_55_P2010396	Pde4d	ENSMUST00000177907	0.747639	3.42016e-07	1.00511e-05	1.67904
A_51_P358722	Lancl3	ENSMUST00000069763	0.747503	4.67142e-06	7.63258e-05	1.67888
A_55_P2180769	Gls	ENSMUST00000114513	0.747318	6.35912e-05	0.000563862	1.67867
A_55_P2180764	Gls	ENSMUST00000114513	0.746683	3.74722e-07	1.06922e-05	1.67793
A_51_P186476	Slc11a1	ENSMUST00000131511	0.746429	8.61387e-05	0.000710693	1.67764
A_55_P1991164	Mlc1	ENSMUST00000042594	0.746184	0.101958	0.169425	1.67735
A_55_P2092225			0.745748	0.0967759	0.162383	1.67684
A_51_P229599	Etnk1	ENSMUST00000032413	0.745557	3.25524e-06	5.81101e-05	1.67662
A_55_P1971347	Mta3	ENSMUST00000112350	0.745468	0.000219349	0.00144036	1.67652
A_52_P436643	Asah2	ENSMUST00000096119	0.745391	0.000199411	0.00134518	1.67643
A_55_P2017086	Ezh1	ENSMUST00000107285	0.745341	0.00638623	0.0189899	1.67637
A_55_P2046494	Zfand4	ENSMUST00000112900	0.744718	0.000262939	0.00165683	1.67565
A_52_P819011	Cbl	ENSMUST00000037644	0.744688	8.56164e-06	0.000121665	1.67561
A_51_P475378	Echdc3	ENSMUST00000042658	0.744086	1.03145e-05	0.000139946	1.67491
A_55_P1958220	Crebl2	ENSMUST00000046303	0.744044	0.000259116	0.0016418	1.67486
A_66_P140613			0.74311	2.82544e-06	5.2296e-05	1.67378
A_55_P2002819	Rabgap1l	ENSMUST00000028049	0.742921	8.36418e-07	2.0507e-05	1.67356
A_52_P108845	Clip3	ENSMUST00000014065	0.742866	2.55224e-05	0.000280981	1.6735
A_52_P205797	Vgll4	ENSMUST00000032459	0.742495	2.00172e-06	4.05608e-05	1.67307
A_55_P2043261	Atxn7l2	ENSMUST00000141054	0.742341	1.19011e-06	2.70309e-05	1.67289
A_55_P2005285	Klhl22	ENSMUST00000117192	0.742068	3.07557e-06	5.58224e-05	1.67257
A_55_P2059532	Gon4l	ENSMUST00000090942	0.740544	2.95729e-06	5.41794e-05	1.67081
A_51_P204080	Hk2	ENSMUST00000168725	0.740284	1.73601e-05	0.000210141	1.67051
A_51_P511015	Fzd9	ENSMUST00000062572	0.739907	0.000877575	0.00417893	1.67007
A_55_P2093679	Zfp599	ENSMUST00000086281	0.739833	4.06254e-06	6.85554e-05	1.66998
A_55_P2045755	Plcxd2	ENSMUST00000130481	0.739368	0.00046341	0.00256724	1.66944
A_55_P1969796	Zdhhc9	ENSMUST00000037960	0.738927	7.58656e-05	0.000649037	1.66893
A_52_P105015	Clcn7	ENSMUST00000040729	0.738557	1.04221e-05	0.000140787	1.66851
A_52_P618774	Hs1bp3	ENSMUST00000020927	0.738414	8.30092e-06	0.00011882	1.66834
A_52_P166266	Irak4	ENSMUST00000138306	0.737882	4.52177e-05	0.000434476	1.66773
A_55_P1984243	Naip2	ENSMUST00000117913	0.737363	1.38505e-06	3.07474e-05	1.66713
A_55_P1979694			0.737356	2.74367e-06	5.11471e-05	1.66712
A_51_P112445	Wdr3	ENSMUST00000052120	0.737263	1.63324e-06	3.47565e-05	1.66701
A_51_P369426	Mss51	ENSMUST00000022353	0.737101	8.23481e-05	0.000688892	1.66682
A_51_P357207	Zfp518b	ENSMUST00000179555	0.73671	7.85159e-06	0.000114359	1.66637
A_55_P2008987	Ch25h	ENSMUST00000050562	0.736318	1.36234e-05	0.000174137	1.66592
A_55_P2128326	Ubap2l	ENSMUST00000090908	0.735984	4.01043e-06	6.79414e-05	1.66553
A_55_P2032770	Inpp5e	ENSMUST00000114090	0.735336	4.82014e-05	0.000457046	1.66478
A_55_P2015520	Plekha1	ENSMUST00000048180	0.735067	1.55526e-07	5.30706e-06	1.66447
A_51_P103929	Met	ENSMUST00000080469	0.735062	7.83501e-08	3.16329e-06	1.66447
A_52_P574653	Bid	ENSMUST00000004560	0.734815	1.17664e-07	4.29315e-06	1.66418
A_51_P165082	Tmem191c	ENSMUST00000164950	0.733961	3.27917e-05	0.00034168	1.6632
A_55_P2075100	Bcl9	ENSMUST00000166341	0.731966	0.00836321	0.0235179	1.6609
A_55_P2097736	Patz1	ENSMUST00000057089	0.73163	3.56741e-06	6.24441e-05	1.66051
A_51_P186798			0.731489	0.000105758	0.000830047	1.66035
A_52_P439995	Rab43	ENSMUST00000078647	0.731155	4.00322e-06	6.79414e-05	1.65997
A_51_P493256	Pex10	ENSMUST00000125432	0.731052	7.19614e-06	0.000106756	1.65985
A_55_P2088735	Pcnp	ENSMUST00000130818	0.73077	0.00469486	0.0150302	1.65952
A_52_P117408	Tg	ENSMUST00000163495	0.730559	0.000184153	0.001268	1.65928
A_51_P331841	Ccdc122	ENSMUST00000175810	0.730532	0.000824294	0.00397428	1.65925
A_52_P189005	Gk5	ENSMUST00000129774	0.73042	4.42635e-05	0.0004287	1.65912
A_52_P312398	Ssr3	ENSMUST00000119896	0.729822	1.13397e-06	2.61407e-05	1.65843
A_55_P2061520			0.729779	0.000109498	0.00084986	1.65838
A_55_P2163744	Jph1	ENSMUST00000038382	0.729771	0.00877093	0.0244013	1.65838
A_55_P1960238	Slc2a6	ENSMUST00000129835	0.729198	3.86437e-05	0.000386974	1.65772
A_51_P252859	Cyr61	ENSMUST00000029846	0.728401	1.25855e-05	0.00016337	1.6568
A_51_P222657	Tspo	ENSMUST00000047419	0.728249	1.44913e-05	0.000182196	1.65663
A_52_P324754	Nupr1l		0.72774	0.00364316	0.012361	1.65604
A_52_P18922	Chid1	ENSMUST00000143561	0.727735	7.02034e-05	0.000611449	1.65604
A_51_P227275	Csn3	ENSMUST00000001667	0.727443	0.000456608	0.00253475	1.6557
A_52_P305279	Spata13	ENSMUST00000160973	0.727337	1.75467e-05	0.000211385	1.65558
A_55_P2036280	Psen2	ENSMUST00000130029	0.726853	1.8856e-05	0.000222563	1.65502
A_55_P2085932	Lamtor2	ENSMUST00000156421	0.726471	7.00603e-07	1.77826e-05	1.65459
A_51_P347862	Actn1	ENSMUST00000167327	0.726363	1.42404e-06	3.1355e-05	1.65446
A_55_P2002497		ENSMUST00000084563	0.726201	0.00267314	0.00977648	1.65428
A_51_P241843	Tmem202	ENSMUST00000055345	0.72377	0.000356599	0.00210567	1.65149
A_55_P2128526	Pfn2	ENSMUST00000119344	0.723078	0.000158136	0.00113141	1.6507
A_66_P120380	Apol10b	ENSMUST00000181154	0.722854	1.81967e-05	0.000217245	1.65044
A_55_P2187206			0.722175	0.000323046	0.00194367	1.64967
A_51_P208435	Ston1	ENSMUST00000163588	0.722055	2.80564e-06	5.20187e-05	1.64953
A_55_P2149812	Srsf11	ENSMUST00000133090	0.721673	7.18922e-06	0.000106756	1.64909
A_55_P2153570	Zfp655	ENSMUST00000085661	0.721382	6.52288e-05	0.000576726	1.64876
A_52_P391018	Jade3	ENSMUST00000043693	0.720591	0.00212025	0.00816789	1.64786
A_55_P2095820	Kalrn	ENSMUST00000142817	0.720554	1.4021e-05	0.000177993	1.64781
A_55_P2140726	Polr3gl	ENSMUST00000141579	0.72051	4.5095e-05	0.000433877	1.64776
A_55_P2084413	Lrrtm2	ENSMUST00000091636	0.720462	0.0012975	0.00564242	1.64771
A_55_P2078213	1700020I14Rik		0.71804	7.85578e-05	0.000664389	1.64495
A_52_P537696	Mettl8	ENSMUST00000148876	0.71748	0.000106399	0.00083325	1.64431
A_55_P2077613	Fam102a	ENSMUST00000136816	0.717222	4.15491e-05	0.000409238	1.64401
A_55_P2058591	Mylpf		0.717199	3.96997e-05	0.000393536	1.64399
A_55_P2186929			0.716977	3.02505e-07	9.11314e-06	1.64373
A_51_P426214	Src	ENSMUST00000109529	0.716707	8.26248e-05	0.000690138	1.64343
A_52_P325443	Arhgap29	ENSMUST00000037958	0.715558	1.43253e-06	3.14138e-05	1.64212
A_55_P2128229			0.715523	3.08283e-06	5.58224e-05	1.64208
A_55_P2145838	Dmpk	ENSMUST00000128422	0.71541	5.32973e-05	0.000491345	1.64195
A_52_P297773	Uggt2	ENSMUST00000131424	0.714621	4.22099e-05	0.000414613	1.64105
A_51_P434776	Jmjd8	ENSMUST00000026832	0.714561	2.154e-06	4.30401e-05	1.64098
A_51_P248387	Pcyox1l	ENSMUST00000025472	0.714491	0.000332521	0.0019885	1.6409
A_55_P2072736	Gmps	ENSMUST00000029405	0.713975	6.29025e-05	0.000559091	1.64032
A_55_P2095573	Spata5l1		0.713189	0.00049737	0.00270814	1.63942
A_66_P116912	Tia1	ENSMUST00000113712	0.712593	0.000456047	0.00253229	1.63875
A_55_P2002597			0.712399	2.16331e-06	4.31065e-05	1.63853
A_55_P2063646	Krcc1	ENSMUST00000168700	0.711797	3.70729e-06	6.41647e-05	1.63784
A_52_P494115	Gatad2b	ENSMUST00000049382	0.710791	1.58341e-05	0.000195438	1.6367
A_55_P2051400	Prl3d2	ENSMUST00000164964	0.710789	0.00136391	0.00586018	1.6367
A_52_P126055	Pon2	ENSMUST00000057792	0.710274	1.52074e-05	0.000188891	1.63611
A_55_P2066269	Aak1		0.710104	1.4792e-05	0.000185007	1.63592
A_52_P654043	Msto1	ENSMUST00000147828	0.709802	6.22944e-06	9.59058e-05	1.63558
A_55_P2103698	Isg15	ENSMUST00000085425	0.7097	9.79269e-05	0.000779374	1.63546
A_52_P673863	Cdkn1b	ENSMUST00000067327	0.709501	0.000293536	0.0018038	1.63524
A_55_P2029549	Dtd1	ENSMUST00000028917	0.709435	1.4198e-05	0.000179343	1.63516
A_52_P311297	Als2	ENSMUST00000027178	0.708663	3.55498e-05	0.000364343	1.63429
A_55_P2341468	Rbms3	ENSMUST00000111773	0.708574	3.56031e-05	0.00036464	1.63419
A_55_P2086511	Ppid	ENSMUST00000029382	0.707995	3.60022e-06	6.29165e-05	1.63353
A_52_P40241	Zfp746	ENSMUST00000073124	0.707837	2.8475e-07	8.67503e-06	1.63335
A_51_P454309	Zfp772	ENSMUST00000074455	0.707585	8.2196e-06	0.000117978	1.63307
A_55_P2083481	Lpin1	ENSMUST00000067124	0.707142	0.00113622	0.00510556	1.63257
A_52_P240470	Ap1ar	ENSMUST00000051737	0.70692	6.27688e-05	0.000558635	1.63232
A_55_P1963031	Ampd2	ENSMUST00000102637	0.706889	5.73575e-06	9.01034e-05	1.63228
A_52_P956363		ENSMUST00000067077	0.706856	9.98284e-05	0.000791591	1.63224
A_51_P263377	Thnsl1	ENSMUST00000102951	0.706735	5.13353e-05	0.000477538	1.63211
A_52_P592101	Fam21	ENSMUST00000036759	0.706579	7.17564e-07	1.81279e-05	1.63193
A_52_P355095	Dstyk	ENSMUST00000045110	0.70652	0.000604246	0.00313141	1.63186
A_55_P2045528	Atxn1	ENSMUST00000180110	0.706405	0.000108305	0.000843633	1.63173
A_55_P2133310	Steap2	ENSMUST00000164219	0.706011	0.00574393	0.0175423	1.63129
A_55_P2444515	Akap2	ENSMUST00000098066	0.705359	1.49068e-06	3.24711e-05	1.63055
A_51_P156158	Phlpp1	ENSMUST00000061047	0.704853	0.000221474	0.00145097	1.62998
A_52_P668285	Plk4	ENSMUST00000026858	0.704538	0.000768222	0.0037687	1.62962
A_55_P2086507	Bglap3	ENSMUST00000107542	0.704464	4.70224e-06	7.67712e-05	1.62954
A_55_P2030368	Tm7sf3	ENSMUST00000138476	0.704203	0.000460438	0.00255208	1.62924
A_55_P2038081	Zfp369	ENSMUST00000126879	0.703973	0.000148621	0.00107761	1.62898
A_55_P1963434	Gpc4	ENSMUST00000033450	0.703869	0.000443015	0.00247584	1.62887
A_55_P2096405	Cdc42bpa	ENSMUST00000143176	0.703817	0.00193611	0.00763974	1.62881
A_52_P595006	Vps72	ENSMUST00000139296	0.703562	6.10437e-07	1.57721e-05	1.62852
A_51_P405397	Ecm1	ENSMUST00000144958	0.703219	7.01656e-07	1.77885e-05	1.62813
A_51_P429366	Hes6	ENSMUST00000126136	0.702976	1.37843e-06	3.06633e-05	1.62786
A_52_P458631	Ttll5	ENSMUST00000177114	0.702645	0.000375683	0.00219258	1.62749
A_51_P405089	Lpcat1	ENSMUST00000022099	0.702448	0.000588202	0.00306149	1.62726
A_66_P139694	Mppe1	ENSMUST00000073054	0.70234	5.01712e-05	0.000470443	1.62714
A_55_P1981794	Ccdc101	ENSMUST00000138794	0.701602	3.27241e-05	0.000341422	1.62631
A_51_P363214	D630045J12Rik	ENSMUST00000144973	0.701055	2.62283e-05	0.00028758	1.62569
A_51_P106752	Rnmt	ENSMUST00000148937	0.700638	0.000193148	0.00131278	1.62522
A_55_P2248651	Aak1		0.700113	1.45246e-06	3.17864e-05	1.62463
A_55_P2039061	Trim12c	ENSMUST00000059037	0.699793	2.32559e-05	0.000262039	1.62427
A_55_P1982578	Kdm3a	ENSMUST00000167220	0.699416	5.9749e-07	1.55679e-05	1.62385
A_55_P2155931	Tnfsf12Tnfsf13	ENSMUST00000174159	0.698905	1.89967e-05	0.000223828	1.62327
A_55_P2062602	4932438A13Rik	ENSMUST00000057272	0.698859	0.000251446	0.00160308	1.62322
A_52_P626780		ENSMUST00000109162	0.698502	0.00051614	0.00277507	1.62282
A_52_P385536	Ddx58	ENSMUST00000137903	0.697854	8.19294e-05	0.000687787	1.62209
A_55_P2013158	Ablim1	ENSMUST00000111546	0.697799	2.63941e-05	0.000288957	1.62203
A_52_P11441	Rab6b	ENSMUST00000035155	0.697666	1.46592e-05	0.000183947	1.62188
A_52_P663757	Tnik	ENSMUST00000160934	0.697321	0.00021086	0.00139967	1.62149
A_55_P2180944	Tmco4	ENSMUST00000050949	0.697308	0.00013967	0.00102965	1.62148
A_55_P1991219	Stat3	ENSMUST00000156645	0.697255	4.02448e-05	0.000397843	1.62142
A_66_P100937	LOC102642338		0.697082	1.78225e-05	0.000213632	1.62122
A_55_P1992495	Gpc4		0.697081	0.00105507	0.0048283	1.62122
A_52_P163939	Cln6	ENSMUST00000034776	0.695425	4.61845e-07	1.25958e-05	1.61936
A_55_P2045007	Hrh1	ENSMUST00000088987	0.695153	4.5578e-06	7.46954e-05	1.61906
A_51_P510882	Adam12	ENSMUST00000067680	0.695076	3.14182e-05	0.000330556	1.61897
A_55_P2020348	Zbtb7b	ENSMUST00000107435	0.694909	4.19256e-06	7.01324e-05	1.61878
A_55_P2186352	Ttc12	ENSMUST00000055096	0.694338	5.47737e-07	1.45524e-05	1.61814
A_51_P152167	Pias3	ENSMUST00000162707	0.69433	0.00105892	0.00483973	1.61813
A_55_P2021177	Abca2	ENSMUST00000102919	0.693916	0.000224097	0.00146327	1.61767
A_55_P2088401	H2-T9	ENSMUST00000080015	0.693887	1.96136e-07	6.40929e-06	1.61764
A_55_P2160253	6720475J19Rik		0.69377	5.76018e-07	1.51363e-05	1.61751
A_52_P510877	Bcl2l1	ENSMUST00000128172	0.693768	5.86929e-05	0.000528456	1.6175
A_51_P148314	Fam117a	ENSMUST00000037502	0.693541	3.53155e-05	0.000362554	1.61725
A_52_P396498	Itsn1	ENSMUST00000144101	0.692519	2.09973e-05	0.000242406	1.6161
A_55_P2101246	Aldh6a1	ENSMUST00000085192	0.692362	0.000102831	0.000810932	1.61593
A_66_P105046	Il18	ENSMUST00000059081	0.692146	5.14823e-07	1.37626e-05	1.61568
A_55_P1991733	Zfand5		0.692061	1.80176e-06	3.73852e-05	1.61559
A_66_P130612	2810408A11Rik	ENSMUST00000142121	0.691671	9.47206e-06	0.000131998	1.61515
A_52_P257686	Rwdd3	ENSMUST00000106467	0.691105	2.49197e-05	0.000276317	1.61452
A_55_P2151762	Atg7	ENSMUST00000182793	0.690576	9.4613e-06	0.000131933	1.61393
A_55_P2163561	Sytl1	ENSMUST00000142039	0.690393	0.000255125	0.00162081	1.61372
A_51_P227777	Top2b	ENSMUST00000017629	0.690309	5.99352e-06	9.31367e-05	1.61363
A_52_P313068	8030462N17Rik	ENSMUST00000074653	0.690295	0.00013661	0.00101332	1.61361
A_55_P2066081	Prmt6	ENSMUST00000106567	0.690128	5.79035e-06	9.07631e-05	1.61343
A_55_P1992910	Gyg	ENSMUST00000178328	0.690051	2.99055e-06	5.46035e-05	1.61334
A_55_P2127683	4933434E20Rik	ENSMUST00000029552	0.689799	1.48367e-05	0.000185459	1.61306
A_51_P366138	Mertk	ENSMUST00000140221	0.689749	3.5726e-07	1.03253e-05	1.613
A_55_P2010038	Tnfsf9	ENSMUST00000039490	0.689597	1.56289e-06	3.37247e-05	1.61283
A_52_P561650	Vwa1	ENSMUST00000042196	0.689154	1.09825e-05	0.000146343	1.61234
A_51_P508485	Tmtc4	ENSMUST00000143189	0.68908	2.38515e-06	4.62886e-05	1.61226
A_66_P132077	Iqcb1	ENSMUST00000023535	0.688867	0.000433965	0.00243598	1.61202
A_52_P61703	Zfp369	ENSMUST00000126879	0.687989	3.08574e-06	5.58224e-05	1.61104
A_51_P432851	Dhrs11	ENSMUST00000047560	0.687319	8.4209e-06	0.000119981	1.61029
A_52_P126266	Prkab2	ENSMUST00000152731	0.687304	1.18403e-06	2.69496e-05	1.61027
A_55_P2156288			0.686739	0.000110832	0.000858669	1.60964
A_52_P212418	Trmt13	ENSMUST00000183638	0.686416	7.12368e-05	0.00061771	1.60928
A_51_P149373	Fbxl20	ENSMUST00000103143	0.68629	3.53683e-05	0.000362924	1.60914
A_51_P403273	Tax1bp1	ENSMUST00000080723	0.686176	5.13405e-07	1.37417e-05	1.60901
A_52_P506871	Btbd7	ENSMUST00000045652	0.685914	2.15919e-06	4.3103e-05	1.60872
A_55_P2219657	Tmf1		0.685728	7.93258e-06	0.000115305	1.60851
A_55_P2425801	Fmn1	ENSMUST00000102547	0.684946	1.68089e-05	0.00020501	1.60764
A_52_P297009	Itpk1	ENSMUST00000046518	0.684894	0.000136286	0.00101196	1.60758
A_51_P472608	Vangl2	ENSMUST00000111263	0.684371	0.00139145	0.00595156	1.607
A_65_P16630	BC068281	ENSMUST00000085793	0.684251	0.000328422	0.00196834	1.60687
A_52_P132507	Prune	ENSMUST00000015855	0.684167	1.45297e-05	0.000182572	1.60677
A_52_P188678	Pvrl2	ENSMUST00000108450	0.683855	9.71981e-07	2.3122e-05	1.60643
A_51_P416556	Ssr3	ENSMUST00000029414	0.683847	4.63115e-07	1.26145e-05	1.60642
A_55_P2096435	Zc3h6	ENSMUST00000110320	0.683831	0.00159283	0.00658654	1.6064
A_55_P2004365	Nupl2	ENSMUST00000049887	0.683238	0.000703368	0.00352092	1.60574
A_55_P2042612	C1s1	ENSMUST00000162443	0.683169	2.16114e-06	4.3103e-05	1.60566
A_51_P136699	Ttc7b	ENSMUST00000062957	0.682529	1.85727e-06	3.82796e-05	1.60495
A_52_P642167	Soat1	ENSMUST00000051396	0.682177	1.0922e-05	0.000145807	1.60456
A_55_P2086575	Arhgap19	ENSMUST00000163265	0.681844	0.000345175	0.00204939	1.60419
A_52_P629451	Gon4l	ENSMUST00000107498	0.681825	2.41399e-07	7.64548e-06	1.60417
A_51_P237834	Tmcc1	ENSMUST00000088896	0.681744	1.0667e-05	0.000143021	1.60408
A_55_P2024439	Gaa	ENSMUST00000128753	0.681249	0.000337811	0.00201178	1.60353
A_51_P274259	Ak5	ENSMUST00000045262	0.681151	7.52717e-05	0.00064493	1.60342
A_52_P135421	Socs6	ENSMUST00000070116	0.680722	0.000156627	0.00112322	1.60294
A_66_P108263	Pwwp2a	ENSMUST00000094294	0.680592	0.000577728	0.00302593	1.6028
A_51_P106059	Traf4	ENSMUST00000017530	0.680352	2.71315e-06	5.07394e-05	1.60253
A_51_P149699	Leprel2	ENSMUST00000126987	0.680328	4.00792e-06	6.79414e-05	1.6025
A_52_P424871	Crbn	ENSMUST00000113239	0.679744	8.37676e-05	0.000696876	1.60186
A_55_P2167984	Mmd	ENSMUST00000004050	0.679681	2.80093e-05	0.000303867	1.60179
A_52_P305685			0.679426	1.29521e-06	2.90515e-05	1.6015
A_51_P121302	Them4	ENSMUST00000049822	0.679299	2.40554e-06	4.66005e-05	1.60136
A_52_P265965	Trim36	ENSMUST00000037011	0.678707	3.10385e-05	0.00032816	1.6007
A_51_P331003	Sema4g	ENSMUST00000179305	0.678404	0.000232398	0.00150519	1.60037
A_52_P265544	Exoc6b	ENSMUST00000162821	0.677567	7.68295e-05	0.0006549	1.59944
A_52_P451888	Tlk2	ENSMUST00000015107	0.677459	0.000206661	0.00137774	1.59932
A_55_P2104617	Kctd5	ENSMUST00000017090	0.677359	1.84325e-06	3.80632e-05	1.59921
A_52_P306351	Asph	ENSMUST00000084915	0.677309	7.45523e-07	1.87248e-05	1.59915
A_52_P681488	Stx17	ENSMUST00000107720	0.677283	3.07673e-05	0.000325772	1.59913
A_55_P2034372	Eif4g3	ENSMUST00000084215	0.676744	4.98636e-06	8.04372e-05	1.59853
A_52_P265002	Pik3ca	ENSMUST00000108243	0.676726	0.000222752	0.00145757	1.59851
A_51_P301930	Lrrc17	ENSMUST00000035651	0.676515	1.06297e-05	0.000142845	1.59827
A_55_P2088690			0.67635	0.000288649	0.00177985	1.59809
A_55_P2053848	LOC102632427		0.676349	6.19065e-06	9.54447e-05	1.59809
A_55_P2120737	Gm10537		0.676155	0.000217845	0.00143284	1.59788
A_55_P2076303	2004-02-29	ENSMUST00000101032	0.676152	7.55067e-05	0.000646431	1.59787
A_52_P569794	Mphosph9	ENSMUST00000031344	0.676109	1.05925e-05	0.000142465	1.59782
A_55_P2014224	Sema5a	ENSMUST00000067458	0.675963	5.08188e-05	0.000474573	1.59766
A_55_P2016203	Mrpl47	ENSMUST00000043966	0.675949	0.000224637	0.00146547	1.59765
A_51_P310896	Pfkl	ENSMUST00000020522	0.675947	1.01349e-06	2.38988e-05	1.59764
A_55_P2007377	Elf2	ENSMUST00000163748	0.675595	9.58452e-07	2.28253e-05	1.59726
A_55_P2039205	Rprd2	ENSMUST00000090791	0.674555	0.000540299	0.00287276	1.5961
A_52_P208600	Bms1	ENSMUST00000032237	0.674159	1.41338e-05	0.000178741	1.59567
A_51_P490795	Mxd1	ENSMUST00000001184	0.673801	2.12931e-06	4.26652e-05	1.59527
A_55_P2083814	Zzz3	ENSMUST00000089982	0.673575	7.24663e-06	0.000107357	1.59502
A_51_P111455	Wdr77	ENSMUST00000127464	0.67357	2.58683e-05	0.00028421	1.59502
A_55_P2332731		ENSMUST00000165661	0.67344	1.01524e-05	0.000138617	1.59487
A_51_P500550	Mfsd1	ENSMUST00000029344	0.673363	2.47972e-05	0.000275383	1.59479
A_55_P2073642	1600014C10Rik	ENSMUST00000067854	0.673233	0.000132583	0.00099067	1.59464
A_55_P2037186	Alkbh2	ENSMUST00000053657	0.673169	4.07397e-07	1.13851e-05	1.59457
A_66_P108685	Cideb	ENSMUST00000001497	0.672789	0.00193994	0.00764785	1.59415
A_55_P2141866	Zfp874b	ENSMUST00000019572	0.67255	0.00343886	0.0118317	1.59389
A_55_P2182497	Maml3	ENSMUST00000121440	0.672495	6.68471e-06	0.000101184	1.59383
A_55_P2092668	Ccbl2	ENSMUST00000044392	0.672391	3.55263e-06	6.23876e-05	1.59371
A_52_P183181	Adar	ENSMUST00000107405	0.672045	7.11843e-06	0.000106186	1.59333
A_55_P2041095	Six4	ENSMUST00000043208	0.671678	0.000151888	0.00109651	1.59292
A_55_P2052416	Iqsec1	ENSMUST00000101151	0.671579	0.000546199	0.00289519	1.59281
A_51_P165683	Hirip3	ENSMUST00000146120	0.670488	1.08299e-05	0.000144667	1.59161
A_52_P615401	Tpra1	ENSMUST00000152585	0.670484	4.03191e-06	6.81983e-05	1.59161
A_55_P1965725	Gapdh	ENSMUST00000182115	0.670316	6.04548e-06	9.37419e-05	1.59142
A_51_P421734	Slc12a7	ENSMUST00000017900	0.669194	5.83758e-07	1.52838e-05	1.59018
A_55_P1969939	Zfp758	ENSMUST00000072477	0.669189	9.28605e-07	2.23113e-05	1.59018
A_55_P2136373	Cep250	ENSMUST00000109618	0.668954	0.00201638	0.00787448	1.58992
A_55_P2143041	Phgdh	ENSMUST00000065793	0.668926	1.17122e-07	4.28061e-06	1.58989
A_55_P1953961	Cdkl3	ENSMUST00000063303	0.66883	0.00346011	0.0118745	1.58978
A_55_P2102444	Rbm20	ENSMUST00000164202	0.668204	0.000115898	0.000888675	1.58909
A_51_P384318	C1ra	ENSMUST00000068593	0.668146	4.87129e-05	0.00045992	1.58903
A_55_P2000133	Cdh2	ENSMUST00000025166	0.667769	0.000715192	0.00356605	1.58861
A_52_P484442	Zfp27	ENSMUST00000172448	0.667675	2.98311e-05	0.000318671	1.58851
A_55_P2102936	Pnrc1	ENSMUST00000049357	0.667649	3.77448e-06	6.51112e-05	1.58848
A_51_P514712	Parp14	ENSMUST00000042665	0.667639	0.00178285	0.00718203	1.58847
A_52_P93902	Alg5	ENSMUST00000044567	0.667631	1.00805e-06	2.38486e-05	1.58846
A_52_P293299	0610010F05Rik	ENSMUST00000141353	0.667484	0.000152295	0.00109836	1.5883
A_52_P541270	Crebl2	ENSMUST00000046303	0.667462	7.31759e-07	1.84434e-05	1.58828
A_55_P2087622	Il4i1	ENSMUST00000118125	0.666983	0.000241425	0.0015511	1.58775
A_51_P243514	Macc1	ENSMUST00000048880	0.666973	1.37458e-05	0.000175272	1.58774
A_55_P2053551	Mast4	ENSMUST00000167058	0.666723	3.10337e-05	0.00032816	1.58746
A_52_P507305	Iah1	ENSMUST00000076813	0.666676	1.33569e-05	0.000171834	1.58741
A_55_P2004016	Crispld2	ENSMUST00000108972	0.666551	0.00125393	0.00549592	1.58727
A_55_P2165539	Aebp2	ENSMUST00000068583	0.666197	1.40068e-06	3.10161e-05	1.58688
A_52_P139819	Zc3h6	ENSMUST00000110320	0.66614	4.68975e-05	0.000447037	1.58682
A_55_P2046262	Phgdh	ENSMUST00000065793	0.665937	1.58074e-07	5.38547e-06	1.5866
A_51_P108853	Lyplal1	ENSMUST00000045388	0.665631	2.38456e-06	4.62886e-05	1.58626
A_51_P161323	Eda2r	ENSMUST00000037353	0.665579	6.67526e-06	0.000101112	1.5862
A_51_P389751	Relb	ENSMUST00000098754	0.665348	1.78451e-06	3.717e-05	1.58595
A_52_P529486	Wdr77	ENSMUST00000010278	0.665272	3.04129e-05	0.000322998	1.58587
A_55_P1958457	Nbeal2	ENSMUST00000167320	0.66492	2.3793e-05	0.000266699	1.58548
A_65_P05396	Rad18	ENSMUST00000156063	0.664642	1.66152e-05	0.000203267	1.58517
A_52_P120168	A530054K11Rik	ENSMUST00000137496	0.664393	0.0034634	0.0118802	1.5849
A_55_P1998194	Snrpn	ENSMUST00000098402	0.664349	4.85719e-06	7.85882e-05	1.58485
A_55_P2092904	Ddb2	ENSMUST00000028696	0.664029	2.1452e-05	0.000246339	1.5845
A_52_P191567	Plcl1	ENSMUST00000042986	0.663943	0.000512381	0.0027634	1.58441
A_55_P1962026	Pigg	ENSMUST00000031189	0.663633	8.51806e-05	0.000704943	1.58407
A_55_P2184751	Ago1	ENSMUST00000127800	0.663472	5.07273e-06	8.15259e-05	1.58389
A_51_P109421	Eif2d	ENSMUST00000068805	0.663424	1.1052e-06	2.5614e-05	1.58384
A_52_P598447	Klhl22		0.663081	0.000554947	0.00293221	1.58346
A_55_P2126775	Gfpt1	ENSMUST00000113658	0.662965	0.000586092	0.00305271	1.58333
A_55_P2005672			0.662716	6.9823e-05	0.000608381	1.58306
A_55_P2044587	Sorcs1	ENSMUST00000111756	0.662556	0.00440153	0.0143074	1.58288
A_55_P1984366	Cdadc1	ENSMUST00000022555	0.662173	0.000383887	0.00222424	1.58246
A_51_P433430	Phc1	ENSMUST00000161054	0.662119	2.36075e-05	0.000265032	1.58241
A_55_P2037072	Zfp600	ENSMUST00000168483	0.661722	0.000943159	0.00440767	1.58197
A_55_P2134690	Ankrd26	ENSMUST00000112830	0.661554	6.99979e-06	0.000104988	1.58179
A_51_P298486	Cog6	ENSMUST00000036665	0.661175	2.99327e-07	9.0426e-06	1.58137
A_51_P451338	Jag2	ENSMUST00000075827	0.661152	1.63225e-06	3.47565e-05	1.58134
A_51_P426270	Mgp	ENSMUST00000032342	0.660916	8.70238e-07	2.10967e-05	1.58109
A_52_P462432	Copg1	ENSMUST00000113607	0.660889	2.05771e-05	0.000238575	1.58106
A_52_P215469	Plekha1	ENSMUST00000075181	0.6607	5.66285e-05	0.000513508	1.58085
A_51_P109939	Apoa1bp	ENSMUST00000029708	0.660679	5.70527e-07	1.50359e-05	1.58083
A_55_P2009498	Ccdc28a	ENSMUST00000080860	0.66004	4.17136e-05	0.000410484	1.58013
A_55_P1957876	Gm7664		0.659811	7.98553e-07	1.99123e-05	1.57988
A_55_P1963585	Mbd5	ENSMUST00000112754	0.659627	7.28515e-05	0.00062768	1.57967
A_52_P261322	Tanc1	ENSMUST00000147650	0.659607	1.90046e-05	0.000223828	1.57965
A_55_P1972252	Slc12a6	ENSMUST00000110991	0.6594	6.44918e-05	0.000570444	1.57943
A_55_P2008443	Mybpc1	ENSMUST00000124144	0.659279	0.0932112	0.157787	1.57929
A_55_P2043921	Hmga2	ENSMUST00000072777	0.659182	1.31732e-06	2.94556e-05	1.57919
A_55_P2117130	Zfp937	ENSMUST00000073782	0.658851	2.39462e-05	0.000267722	1.57882
A_52_P88818	Clybl	ENSMUST00000026625	0.658796	3.27592e-05	0.000341505	1.57876
A_55_P2013088	Arpc4	ENSMUST00000138722	0.658773	2.55606e-05	0.000281257	1.57874
A_55_P2056293	Sf3b4	ENSMUST00000076372	0.658715	0.000161199	0.00114456	1.57868
A_52_P209484	Tmem88	ENSMUST00000050140	0.658715	0.000125315	0.000946434	1.57868
A_51_P253527	Rffl	ENSMUST00000021036	0.658446	4.0506e-06	6.84608e-05	1.57838
A_51_P283876	Bphl	ENSMUST00000040656	0.658438	1.14186e-05	0.000150944	1.57837
A_55_P2156093			0.658135	1.03475e-05	0.000140129	1.57804
A_55_P1963184	Pgap1	ENSMUST00000097739	0.657776	0.000895748	0.00424174	1.57765
A_51_P447287	Fkbp14	ENSMUST00000133446	0.657545	0.000183641	0.00126609	1.5774
A_55_P2146404	Kansl1	ENSMUST00000018556	0.657273	8.74581e-05	0.000718287	1.5771
A_55_P2137586	Nphp4	ENSMUST00000056567	0.657269	1.62899e-05	0.000200142	1.57709
A_55_P1992174	Tars2	ENSMUST00000098857	0.657182	6.93751e-05	0.0006057	1.577
A_51_P491470	Ddx47	ENSMUST00000155022	0.656721	3.04157e-05	0.000322998	1.5765
A_51_P472518	Capn1	ENSMUST00000025891	0.656692	2.81079e-05	0.000304479	1.57646
A_55_P2133845	Eid2b	ENSMUST00000094651	0.656423	2.63624e-05	0.000288756	1.57617
A_65_P14710	Zfp850		0.655977	7.62098e-06	0.000111602	1.57568
A_51_P218682	Tex26	ENSMUST00000031667	0.655911	7.63023e-06	0.000111662	1.57561
A_51_P500949	Aff1	ENSMUST00000031256	0.655737	0.000776513	0.00379988	1.57542
A_55_P2035216	Cyb5d1	ENSMUST00000108660	0.65563	0.000131293	0.000982991	1.5753
A_55_P2174501	Stx17	ENSMUST00000107721	0.655612	4.68266e-05	0.000446558	1.57528
A_52_P47255	Gmps	ENSMUST00000029405	0.655233	0.000157863	0.00113021	1.57487
A_51_P163233	2810403A07Rik	ENSMUST00000029696	0.65511	3.38385e-05	0.000349985	1.57474
A_55_P2030080	Kdm6b	ENSMUST00000094077	0.655049	1.83049e-06	3.78722e-05	1.57467
A_55_P2022354	Tmem209	ENSMUST00000115160	0.654717	4.06991e-07	1.13851e-05	1.57431
A_51_P450527	Tagln	ENSMUST00000034590	0.654197	0.000198673	0.00134146	1.57374
A_52_P654437			0.654067	3.1991e-06	5.7488e-05	1.5736
A_52_P257472	Prr12	ENSMUST00000057293	0.653997	3.35758e-06	5.96177e-05	1.57352
A_55_P1993998	Slc35d2	ENSMUST00000099441	0.653915	0.000210456	0.00139744	1.57343
A_52_P459276	Ift81	ENSMUST00000135956	0.653263	2.65844e-06	5.0063e-05	1.57272
A_52_P142191	Aph1b	ENSMUST00000168309	0.652791	0.000167044	0.00117836	1.57221
A_55_P1998416	Ifi47	ENSMUST00000109202	0.652511	0.000270007	0.00169039	1.5719
A_51_P196726	Itih2	ENSMUST00000042290	0.652369	5.03839e-05	0.000471735	1.57175
A_52_P93837	Mme	ENSMUST00000029400	0.652226	0.00476972	0.0152153	1.57159
A_51_P414448	Naa15	ENSMUST00000029303	0.652203	0.000349886	0.00207226	1.57157
A_52_P512553	Atg16l2	ENSMUST00000139609	0.65204	6.66795e-05	0.000586671	1.57139
A_55_P2005719			0.652011	3.85255e-06	6.61487e-05	1.57136
A_55_P2076846	Tead2	ENSMUST00000107801	0.651986	7.51585e-06	0.000110537	1.57133
A_51_P273157	Pde6h	ENSMUST00000057650	0.650831	0.000279777	0.00173257	1.57007
A_55_P2151986	Gngt2	ENSMUST00000107711	0.650753	1.08725e-06	2.5266e-05	1.56999
A_55_P2017590	Exog	ENSMUST00000035094	0.650306	5.23736e-06	8.34885e-05	1.5695
A_55_P2032740	Iars2	ENSMUST00000027921	0.650192	7.24551e-05	0.000625012	1.56938
A_55_P2124385	Ak4	ENSMUST00000151561	0.649912	1.99672e-05	0.000232628	1.56907
A_52_P374157	Kbtbd8	ENSMUST00000032107	0.649137	0.00385277	0.0129063	1.56823
A_55_P1979645	S100a1	ENSMUST00000060738	0.648913	2.35038e-05	0.000264115	1.56799
A_55_P1982454	Eps8	ENSMUST00000100841	0.648867	1.66217e-06	3.52681e-05	1.56794
A_51_P363947	Cdkn1a	ENSMUST00000023829	0.648477	1.13348e-05	0.000150211	1.56751
A_66_P128537	Isg15	ENSMUST00000085425	0.64842	0.00121256	0.00536158	1.56745
A_55_P2065385	Camsap1	ENSMUST00000091268	0.648357	1.5817e-05	0.000195338	1.56738
A_55_P1978316	Adamts14	ENSMUST00000092486	0.648262	5.32488e-06	8.47529e-05	1.56728
A_55_P2008687	Nlk	ENSMUST00000142739	0.64812	7.83892e-06	0.000114251	1.56713
A_55_P2159234	Tatdn2	ENSMUST00000113022	0.647642	1.33516e-06	2.98235e-05	1.56661
A_52_P585751	Gns	ENSMUST00000040344	0.647521	3.69379e-06	6.40782e-05	1.56647
A_51_P509489	Kras	ENSMUST00000032399	0.647504	1.09798e-05	0.000146343	1.56646
A_66_P127311	Esco1	ENSMUST00000145320	0.647479	0.000129043	0.000971534	1.56643
A_55_P1985109	Pogz	ENSMUST00000107270	0.647447	9.84142e-05	0.000782675	1.56639
A_55_P2079860	Asap3	ENSMUST00000047526	0.647326	9.01605e-06	0.000126902	1.56626
A_65_P13209	Ctsd	ENSMUST00000066401	0.647176	3.72487e-05	0.000375177	1.5661
A_55_P1998354	Wbp4	ENSMUST00000022601	0.646766	8.63508e-05	0.000711294	1.56565
A_55_P1987196	Gm3448	ENSMUST00000040746	0.646437	1.62986e-05	0.000200142	1.5653
A_55_P2124016	Nipsnap1	ENSMUST00000038570	0.646203	1.53708e-06	3.33343e-05	1.56504
A_51_P483483		ENSMUST00000038450	0.646158	9.13578e-05	0.000741296	1.565
A_55_P1972039	Nox4	ENSMUST00000032781	0.646028	0.00115364	0.00516877	1.56485
A_55_P2140449	B3galt4	ENSMUST00000087543	0.645929	0.000171054	0.0011996	1.56475
A_55_P2151601	Samd9l	ENSMUST00000120087	0.645587	5.57751e-06	8.82047e-05	1.56438
A_55_P2170787	Braf	ENSMUST00000002487	0.645522	6.43818e-05	0.000569704	1.5643
A_52_P638798	Mipol1	ENSMUST00000148418	0.645471	1.66189e-05	0.000203267	1.56425
A_55_P2071532			0.645005	1.66585e-07	5.62224e-06	1.56375
A_55_P2159885	Tead1	ENSMUST00000069256	0.644969	0.000264035	0.00166229	1.56371
A_55_P2078623	Stxbp3a	ENSMUST00000102621	0.64429	2.69508e-06	5.04451e-05	1.56297
A_51_P254855	Ptgs2	ENSMUST00000035065	0.644167	2.91872e-05	0.000313966	1.56284
A_51_P512629	Ttll5	ENSMUST00000155448	0.644146	8.31422e-07	2.04308e-05	1.56281
A_55_P2064741	Nmb	ENSMUST00000149792	0.644093	5.08808e-05	0.000474741	1.56276
A_55_P2062642	Magt1	ENSMUST00000033583	0.643845	7.43955e-07	1.87071e-05	1.56249
A_51_P511386	D3Ertd254e	ENSMUST00000165956	0.643807	1.276e-06	2.877e-05	1.56245
A_52_P461807	Rcbtb1	ENSMUST00000174009	0.643782	4.78007e-05	0.000454243	1.56242
A_51_P135357	Sike1	ENSMUST00000029447	0.643756	4.42985e-05	0.0004287	1.56239
A_55_P2077964	Vps8	ENSMUST00000096192	0.643427	7.00408e-06	0.000104988	1.56204
A_52_P403020	Xrn1	ENSMUST00000034981	0.643362	2.33361e-05	0.000262668	1.56196
A_52_P485007	Abca2	ENSMUST00000102919	0.643137	3.46337e-05	0.000357253	1.56172
A_51_P165165	Hibadh	ENSMUST00000031788	0.643041	3.66528e-05	0.00037169	1.56162
A_51_P306017	Dll1	ENSMUST00000140784	0.642409	5.78034e-06	9.0672e-05	1.56093
A_55_P2156350	Clcn5	ENSMUST00000004428	0.642157	0.000188207	0.00128689	1.56066
A_55_P1994258	Gapdh	ENSMUST00000089534	0.642113	4.20193e-07	1.16401e-05	1.56061
A_55_P2093595	Mmd	ENSMUST00000004050	0.641498	1.21028e-05	0.000158299	1.55995
A_55_P2091472	Bnip3	ENSMUST00000106112	0.641226	0.00146204	0.00617524	1.55965
A_51_P315682	Igf2bp2	ENSMUST00000134188	0.641093	1.31168e-05	0.000169249	1.55951
A_55_P2043267	Cdc42se1	ENSMUST00000107201	0.64108	2.2473e-06	4.44456e-05	1.5595
A_55_P2038152	Sowaha	ENSMUST00000104955	0.640944	0.0417268	0.0831456	1.55935
A_55_P2185940	Meis3	ENSMUST00000175946	0.640641	0.00275892	0.0100172	1.55902
A_51_P139651	Nos3	ENSMUST00000030834	0.640326	6.49086e-07	1.6592e-05	1.55868
A_55_P2074488	Crim1	ENSMUST00000112498	0.640211	1.73843e-05	0.000210141	1.55856
A_51_P141190	Dffa	ENSMUST00000103216	0.639896	0.00239558	0.00899123	1.55822
A_51_P520793	Nupl1		0.639839	3.01648e-05	0.000321124	1.55816
A_51_P349341	Npc1	ENSMUST00000025279	0.639747	7.39708e-05	0.000635164	1.55806
A_55_P2043842	Ankmy1	ENSMUST00000160548	0.638821	0.00161401	0.00664684	1.55706
A_55_P2039637	Ift88	ENSMUST00000122063	0.638754	0.000269541	0.00168805	1.55698
A_55_P2071426	Fam86	ENSMUST00000064635	0.638511	3.75134e-05	0.000377405	1.55672
A_66_P117022	Atp6v1e1	ENSMUST00000019354	0.638491	4.24867e-06	7.09206e-05	1.5567
A_55_P1987964	Gm5622	ENSMUST00000096170	0.638408	0.000130501	0.000978125	1.55661
A_55_P2033932	Zzz3	ENSMUST00000106100	0.637821	4.53733e-05	0.000435584	1.55598
A_55_P2187211			0.63744	0.00104671	0.00479816	1.55557
A_52_P369581	Atm	ENSMUST00000118282	0.637348	0.00023394	0.00151336	1.55547
A_55_P2134218	Wdr31	ENSMUST00000030087	0.63723	0.00013444	0.00100264	1.55534
A_55_P2161600	Diap2	ENSMUST00000155333	0.636916	1.21069e-05	0.000158299	1.555
A_55_P1983938	Tmem74		0.636759	8.44222e-05	0.000699854	1.55483
A_51_P356822	Vps13c		0.636014	0.00117509	0.00524529	1.55403
A_52_P279152	Vamp8	ENSMUST00000142613	0.635884	1.07284e-05	0.000143577	1.55389
A_52_P300416	Dcp1a	ENSMUST00000022535	0.63577	4.48528e-06	7.3843e-05	1.55377
A_52_P535052	Rcor1	ENSMUST00000116388	0.635519	0.000382147	0.00221713	1.5535
A_51_P403760	Braf	ENSMUST00000002487	0.635334	2.90615e-05	0.000312925	1.5533
A_55_P2127688	4933434E20Rik	ENSMUST00000161918	0.635004	3.53735e-07	1.02697e-05	1.55294
A_55_P1994586	Itsn1	ENSMUST00000154967	0.634878	8.2857e-06	0.000118681	1.55281
A_55_P2116111	D8Ertd82e	ENSMUST00000110492	0.634841	0.000211207	0.00139967	1.55277
A_55_P2005420			0.634692	0.000120126	0.000914279	1.55261
A_51_P197948	Iws1	ENSMUST00000025243	0.634605	0.000466566	0.00258009	1.55251
A_52_P325527	Edil3	ENSMUST00000081769	0.634387	5.92365e-06	9.23833e-05	1.55228
A_55_P2021465	Phldb2	ENSMUST00000036355	0.634123	4.25286e-06	7.09358e-05	1.55199
A_51_P165087	Snai1	ENSMUST00000052631	0.634095	1.5094e-06	3.27944e-05	1.55196
A_55_P1955687	Alg6	ENSMUST00000097961	0.634076	0.000206039	0.00137444	1.55194
A_55_P2112701			0.633742	1.28357e-05	0.000166018	1.55158
A_55_P1985114	Pogz	ENSMUST00000107265	0.633446	5.25492e-05	0.000485693	1.55127
A_51_P242603	E430018J23Rik	ENSMUST00000165495	0.633402	0.000915122	0.00430927	1.55122
A_52_P497056	Supt20	ENSMUST00000170552	0.633352	0.000204636	0.00136804	1.55116
A_55_P2346654			0.633308	1.40525e-05	0.00017813	1.55112
A_55_P1998374	Ppfibp1	ENSMUST00000016631	0.633296	5.76795e-07	1.51382e-05	1.5511
A_55_P1963975	Lrrc16a	ENSMUST00000072889	0.633182	0.000254725	0.00162016	1.55098
A_66_P108214	Kalrn	ENSMUST00000151491	0.632932	0.040747	0.0815468	1.55071
A_52_P200207	Rmnd5a	ENSMUST00000149415	0.632831	1.91832e-05	0.000225573	1.55061
A_55_P2082470	Kidins220	ENSMUST00000066652	0.632593	2.7497e-05	0.00029891	1.55035
A_55_P2009187	Iffo1	ENSMUST00000117675	0.632318	1.92531e-05	0.000225935	1.55005
A_66_P136930			0.63207	0.00196989	0.00773069	1.54979
A_55_P1957198	Apob	ENSMUST00000037811	0.632026	0.0596039	0.110539	1.54974
A_66_P129710	Gsap	ENSMUST00000036031	0.63162	1.04079e-05	0.000140683	1.5493
A_55_P2130925	Ppp2r2b	ENSMUST00000136118	0.631476	0.000784767	0.00383009	1.54915
A_55_P2211164	5330406M23Rik		0.631158	0.000577308	0.00302519	1.54881
A_55_P2121408	Tpm2	ENSMUST00000133355	0.630973	8.50572e-06	0.00012095	1.54861
A_55_P2185484	Zfp865	ENSMUST00000076251	0.630967	2.30594e-05	0.00025996	1.5486
A_55_P1952186	2810403A07Rik	ENSMUST00000029696	0.630818	0.000148062	0.00107445	1.54844
A_66_P109175	Farsb	ENSMUST00000170217	0.630708	3.15798e-05	0.000331239	1.54832
A_55_P2178733	Tbc1d1	ENSMUST00000140960	0.630516	0.000362286	0.00213109	1.54812
A_55_P2060996			0.630463	0.00550004	0.0169377	1.54806
A_66_P123683	Nabp1	ENSMUST00000027279	0.629993	6.29236e-05	0.000559091	1.54756
A_55_P2017038	Cbx3	ENSMUST00000094623	0.629982	2.2518e-05	0.000255367	1.54755
A_55_P2043013	A930007A09Rik		0.629755	0.000266182	0.00167235	1.5473
A_51_P115346	P2rx6	ENSMUST00000023441	0.629353	0.00137072	0.00588036	1.54687
A_52_P483301	Mios	ENSMUST00000161134	0.628835	3.56238e-05	0.00036468	1.54632
A_51_P262171	Irgm1	ENSMUST00000049519	0.628747	2.36198e-05	0.000265033	1.54622
A_52_P641477	Wars2	ENSMUST00000135960	0.628721	7.74072e-05	0.000658266	1.54619
A_55_P2127265			0.628548	0.000112686	0.000869576	1.54601
A_55_P2363983	Clasp2	ENSMUST00000163895	0.628429	0.0106748	0.0283821	1.54588
A_51_P157982	Fam115a	ENSMUST00000121083	0.628316	2.62549e-06	4.97461e-05	1.54576
A_55_P2185359			0.628296	0.000127686	0.00096266	1.54574
A_55_P2027240	Engase	ENSMUST00000043447	0.628104	8.97362e-05	0.000731159	1.54553
A_55_P1954403	Vps13c	ENSMUST00000077879	0.627998	8.10886e-06	0.000116976	1.54542
A_52_P543869	Shpk	ENSMUST00000131927	0.627684	0.0111977	0.0294534	1.54508
A_55_P2050622	Sh3d19	ENSMUST00000107664	0.627161	1.98141e-05	0.000231218	1.54452
A_51_P240269	Fam199x	ENSMUST00000047852	0.626863	0.00324148	0.0113038	1.5442
A_51_P193000	Bbs4	ENSMUST00000026265	0.626425	4.57749e-05	0.000438076	1.54373
A_52_P734742	Lrrc73	ENSMUST00000095262	0.626394	0.00287988	0.0103451	1.5437
A_55_P1977149	4933426M11Rik	ENSMUST00000068519	0.626379	8.16053e-06	0.000117401	1.54369
A_51_P418526	Sfxn1	ENSMUST00000021930	0.626124	9.25411e-06	0.000129546	1.54341
A_55_P2176623			0.626108	0.000402426	0.00229764	1.5434
A_55_P2021792	Dyrk1b	ENSMUST00000085901	0.626108	3.21669e-06	5.75647e-05	1.5434
A_55_P2155644	2010315B03Rik	ENSMUST00000177714	0.626062	0.000195928	0.00132916	1.54335
A_55_P2037050	2610305D13Rik	ENSMUST00000133006	0.625949	0.00142571	0.00606209	1.54323
A_51_P309744	Gpr89	ENSMUST00000029738	0.625864	0.00167408	0.00683556	1.54313
A_51_P321331	Sptlc2	ENSMUST00000169845	0.624599	0.000273277	0.00170354	1.54178
A_51_P214825	Orc5	ENSMUST00000030872	0.62414	0.00605469	0.0182299	1.54129
A_55_P2095844	Kalrn	ENSMUST00000151491	0.624088	5.62224e-05	0.000510468	1.54124
A_55_P2046198	Slc25a25	ENSMUST00000113310	0.623647	2.35136e-05	0.000264115	1.54076
A_51_P126437	Enc1	ENSMUST00000041623	0.623356	4.16569e-07	1.16102e-05	1.54045
A_66_P102528	Tspan5	ENSMUST00000029800	0.623122	4.77598e-05	0.000454055	1.5402
A_55_P2084860	Slc8b1	ENSMUST00000111889	0.623062	0.000465551	0.00257513	1.54014
A_55_P2050380	Trip11	ENSMUST00000021605	0.622897	1.75664e-05	0.000211385	1.53996
A_55_P2069415	Fxr1	ENSMUST00000167354	0.622661	4.48979e-06	7.38609e-05	1.53971
A_55_P1991054	Tmf1	ENSMUST00000095664	0.62258	2.80623e-05	0.000304137	1.53963
A_51_P150430	Mkrn2	ENSMUST00000000449	0.622435	3.67474e-06	6.39085e-05	1.53947
A_55_P2035584		ENSMUST00000098424	0.622427	2.01926e-05	0.000234747	1.53946
A_52_P71666	Dnajc27	ENSMUST00000049584	0.62238	0.00352685	0.0120462	1.53941
A_55_P2186693			0.622263	8.26101e-06	0.000118406	1.53929
A_55_P2165046	Klhl22	ENSMUST00000165790	0.622259	6.10241e-07	1.57721e-05	1.53928
A_51_P380699	Acsl6	ENSMUST00000094194	0.621962	0.177321	0.263167	1.53897
A_51_P372463	Fxr1	ENSMUST00000001620	0.621644	1.73291e-07	5.8213e-06	1.53863
A_51_P153973	Zfp273	ENSMUST00000181391	0.621641	3.76959e-05	0.000378889	1.53862
A_55_P2155942	Ezh1	ENSMUST00000107285	0.620935	2.00398e-06	4.05679e-05	1.53787
A_55_P2038479	Pddc1	ENSMUST00000127556	0.620684	0.000518535	0.00278685	1.5376
A_52_P350148	Celsr2	ENSMUST00000126349	0.620606	0.00554031	0.0170447	1.53752
A_55_P1952166	Arid3a	ENSMUST00000105376	0.620572	1.61552e-05	0.00019872	1.53749
A_55_P1979403	9630033F20Rik	ENSMUST00000039913	0.620472	6.57895e-06	0.000100004	1.53738
A_52_P431872	Ptcd3	ENSMUST00000082094	0.620335	1.98507e-06	4.03364e-05	1.53723
A_52_P667913	Pcdhga9	ENSMUST00000091935	0.620318	6.3255e-06	9.70389e-05	1.53721
A_51_P486308	Ccdc171	ENSMUST00000107202	0.620253	0.0845808	0.146156	1.53714
A_51_P512591	Cdc42se1	ENSMUST00000053872	0.6202	2.06708e-05	0.000239404	1.53709
A_51_P165984	Aup1	ENSMUST00000092618	0.620032	4.00679e-06	6.79414e-05	1.53691
A_55_P2052862	Fam73a	ENSMUST00000068243	0.619676	0.000468978	0.0025896	1.53653
A_55_P2134877	Eml1	ENSMUST00000155544	0.619301	1.23253e-05	0.000160571	1.53613
A_55_P1969431	Lyrm5	ENSMUST00000111719	0.619263	5.56289e-05	0.000506854	1.53609
A_55_P2031302	Zfp597	ENSMUST00000119599	0.619203	0.000599044	0.00310892	1.53603
A_51_P167426	Herc1	ENSMUST00000144280	0.619117	0.000510134	0.00275472	1.53594
A_55_P2163194	Fktn	ENSMUST00000107638	0.618898	0.00104003	0.00477564	1.5357
A_52_P538447	Bloc1s5	ENSMUST00000035899	0.618195	0.000377356	0.00219878	1.53495
A_52_P65077	Zfp820	ENSMUST00000084141	0.617945	0.000107644	0.000839693	1.53469
A_55_P2120080	Zmynd11	ENSMUST00000137932	0.617664	4.31856e-06	7.17546e-05	1.53439
A_52_P633410	Gabarapl1	ENSMUST00000032264	0.617539	3.06761e-05	0.000324965	1.53426
A_55_P2092085	Tmsb10	ENSMUST00000114048	0.617372	1.42282e-05	0.000179487	1.53408
A_55_P2153580	Zfp655		0.61692	0.000685505	0.0034531	1.5336
A_52_P245365	Rtf1	ENSMUST00000028767	0.616909	7.77973e-05	0.000660024	1.53359
A_52_P353478	Scn7a	ENSMUST00000042792	0.616814	0.00580364	0.0176636	1.53348
A_55_P2018532	Mob3a	ENSMUST00000003438	0.616774	0.000271479	0.00169642	1.53344
A_55_P2010401	Pde4d	ENSMUST00000153234	0.616747	0.000636252	0.00325616	1.53341
A_55_P2026315	Gys1	ENSMUST00000003964	0.615842	4.16892e-06	6.98593e-05	1.53245
A_52_P578768	Slc38a9	ENSMUST00000052514	0.61563	1.81942e-06	3.77155e-05	1.53223
A_55_P2138966	Nab2	ENSMUST00000026469	0.615595	7.16349e-05	0.000619961	1.53219
A_55_P2106426			0.615298	2.13368e-06	4.26736e-05	1.53187
A_52_P45738	Trim35	ENSMUST00000022623	0.615143	0.000225081	0.00146792	1.53171
A_55_P1999625			0.614974	0.000527604	0.00281946	1.53153
A_65_P17869	Rpf1		0.614963	0.00138795	0.00593894	1.53152
A_55_P1992470			0.614823	3.57561e-07	1.03253e-05	1.53137
A_55_P2023557	Pgap1	ENSMUST00000097739	0.614764	0.00064148	0.00327805	1.53131
A_55_P1974233	Dtd2	ENSMUST00000085404	0.614661	4.72366e-06	7.70457e-05	1.5312
A_51_P330369	Ssx2ip	ENSMUST00000106153	0.614454	2.53364e-06	4.8345e-05	1.53098
A_55_P1972040	Nox4	ENSMUST00000032781	0.614142	5.41712e-05	0.000497068	1.53065
A_52_P28775	Engase	ENSMUST00000171769	0.613916	0.000116788	0.000892962	1.53041
A_52_P109319	E2f5	ENSMUST00000165922	0.61391	0.000327415	0.00196449	1.5304
A_55_P2057268	Magi1	ENSMUST00000055224	0.613672	3.83152e-06	6.59381e-05	1.53015
A_66_P122372	Ppp4r2	ENSMUST00000063854	0.613611	7.03668e-05	0.00061227	1.53008
A_55_P1995152			0.613492	4.03132e-07	1.13381e-05	1.52996
A_55_P2013612	Gm11677		0.61331	4.65871e-06	7.61757e-05	1.52976
A_66_P139159	Hras	ENSMUST00000026572	0.613277	0.000799741	0.00388363	1.52973
A_52_P381418	Slc35b4	ENSMUST00000019143	0.612401	1.20861e-05	0.000158299	1.5288
A_55_P2102424	Msto1	ENSMUST00000147828	0.612273	2.41651e-05	0.000269735	1.52867
A_51_P465809	Slc30a9	ENSMUST00000161169	0.612251	0.00023943	0.00154149	1.52864
A_51_P271370	Wsb1	ENSMUST00000153585	0.61216	2.50179e-05	0.00027698	1.52855
A_52_P476431	Evc	ENSMUST00000031005	0.611912	8.39452e-06	0.000119684	1.52828
A_52_P154880	Ing3	ENSMUST00000031680	0.61172	0.000318985	0.00192568	1.52808
A_66_P138289	Rdh5	ENSMUST00000026406	0.611634	5.58131e-06	8.82047e-05	1.52799
A_55_P2048368	Fggy	ENSMUST00000131654	0.611067	2.00491e-05	0.000233205	1.52739
A_55_P1987645	Unc13b	ENSMUST00000079978	0.610837	0.00319538	0.011181	1.52715
A_52_P602996	Cdip1	ENSMUST00000004173	0.610822	8.68163e-07	2.107e-05	1.52713
A_51_P420176	Senp5	ENSMUST00000023457	0.610776	2.49448e-05	0.000276453	1.52708
A_55_P2167630	6330416G13Rik	ENSMUST00000080336	0.610699	0.000594871	0.00309247	1.527
A_55_P2166486	Cd44	ENSMUST00000111198	0.610602	0.0507806	0.097274	1.5269
A_55_P2397240	B430316J06Rik		0.61012	0.000216654	0.00142776	1.52639
A_55_P2124976	Grhl1	ENSMUST00000085553	0.609932	0.00202683	0.00790672	1.52619
A_55_P2357860	Atxn7l1		0.609392	3.07858e-06	5.58224e-05	1.52562
A_51_P437717	0610031J06Rik	ENSMUST00000177005	0.609082	6.33908e-05	0.000562547	1.52529
A_55_P1978596	Trit1	ENSMUST00000141855	0.609072	0.000198827	0.00134208	1.52528
A_55_P2096043	Acot11	ENSMUST00000102762	0.608749	0.000378699	0.00220392	1.52494
A_51_P324572	Ctnna1	ENSMUST00000042345	0.60843	2.96013e-05	0.000316999	1.5246
A_51_P207988	Ptger4	ENSMUST00000047379	0.608407	0.00115894	0.0051882	1.52458
A_55_P2180406	Cdkn2aipnl	ENSMUST00000127136	0.607886	6.95275e-06	0.000104582	1.52402
A_55_P2009915	Stxbp3a	ENSMUST00000138552	0.607792	1.77654e-05	0.000213066	1.52392
A_51_P315673	Usp11	ENSMUST00000149960	0.607785	4.30939e-05	0.000421041	1.52392
A_51_P470328	Sepp1	ENSMUST00000159216	0.607721	4.87517e-06	7.88201e-05	1.52385
A_66_P140076			0.607541	2.59704e-05	0.000285041	1.52366
A_52_P179583	Adnp2	ENSMUST00000066743	0.607505	0.000120645	0.000917256	1.52362
A_51_P317740	Pcgf2	ENSMUST00000134003	0.607455	0.000220313	0.00144512	1.52357
A_55_P1957433	Mprip	ENSMUST00000066330	0.607419	2.30785e-06	4.52356e-05	1.52353
A_55_P2302413	BC002189		0.60714	0.00694842	0.0203038	1.52324
A_55_P1958464			0.606895	2.16949e-07	6.97539e-06	1.52298
A_51_P163252	Schip1	ENSMUST00000182006	0.606349	5.02317e-06	8.09101e-05	1.5224
A_55_P2182437		ENSMUST00000129389	0.606294	0.00125022	0.00548541	1.52234
A_51_P181227	Smurf1	ENSMUST00000085684	0.606041	8.03254e-06	0.000116211	1.52208
A_55_P2144126			0.605899	9.85824e-06	0.000135629	1.52193
A_55_P1959403	Ccdc77	ENSMUST00000112703	0.605812	4.61057e-05	0.000440462	1.52184
A_55_P2005465	Zfp422	ENSMUST00000112880	0.605749	5.57754e-05	0.00050769	1.52177
A_55_P2062977	Ppp3cc		0.605727	0.0595819	0.110517	1.52175
A_55_P2092730	Wdfy1		0.605671	5.95634e-06	9.26257e-05	1.52169
A_51_P337918	Aldh4a1	ENSMUST00000146309	0.605644	7.33357e-06	0.000108571	1.52166
A_55_P2144490			0.605418	0.00133708	0.00577849	1.52142
A_55_P2000603	Slc50a1	ENSMUST00000133575	0.605196	1.02646e-06	2.4152e-05	1.52119
A_52_P167382	Tmem8	ENSMUST00000025010	0.605117	2.24903e-06	4.44456e-05	1.5211
A_51_P150608	Jagn1	ENSMUST00000101070	0.605109	2.6782e-06	5.02599e-05	1.52109
A_51_P430973	Paqr7	ENSMUST00000081525	0.605077	5.39611e-06	8.5766e-05	1.52106
A_55_P2159780	Mob1a	ENSMUST00000038658	0.604776	0.00079598	0.00387059	1.52074
A_51_P308446	1700094D03Rik	ENSMUST00000029551	0.604437	5.812e-06	9.09705e-05	1.52039
A_55_P1990483	Gas2l1	ENSMUST00000037146	0.604164	0.000135273	0.00100625	1.5201
A_52_P95759	Sh3rf3	ENSMUST00000153031	0.604122	6.86483e-06	0.000103331	1.52005
A_51_P254234	Chchd4	ENSMUST00000040835	0.604037	6.03718e-07	1.56923e-05	1.51996
A_55_P2007470	Pdgfa	ENSMUST00000110897	0.603979	3.15262e-05	0.000331239	1.5199
A_55_P1991945			0.603905	3.02145e-05	0.000321494	1.51983
A_55_P2369191	Ggta1	ENSMUST00000102794	0.603887	0.000689702	0.00346939	1.51981
A_55_P1972688	Wnk1	ENSMUST00000088644	0.603699	2.69264e-06	5.04432e-05	1.51961
A_51_P361426	Arl8b	ENSMUST00000032196	0.603669	2.44103e-05	0.000271505	1.51958
A_51_P367866	Egr1	ENSMUST00000165033	0.603461	5.132e-05	0.000477538	1.51936
A_55_P2127592	Smcr8	ENSMUST00000056907	0.603364	0.00211017	0.00814647	1.51926
A_51_P494863	Vmac	ENSMUST00000067931	0.602536	0.00028242	0.00174593	1.51838
A_55_P1953489	Lrrc8b	ENSMUST00000112707	0.602518	7.00296e-06	0.000104988	1.51836
A_55_P2010111	Zxdc	ENSMUST00000075117	0.602497	6.14211e-05	0.000549356	1.51834
A_52_P671700	Acad12	ENSMUST00000041252	0.602233	0.0297705	0.0635983	1.51806
A_52_P149391	Usp40	ENSMUST00000040783	0.602134	2.65065e-06	5.00473e-05	1.51796
A_55_P2036171	Dusp13	ENSMUST00000183893	0.602037	9.33485e-05	0.000752923	1.51786
A_55_P2065449	Kdm5b	ENSMUST00000047714	0.601486	1.9159e-06	3.92261e-05	1.51728
A_55_P2093649			0.601321	1.58683e-05	0.000195637	1.51711
A_55_P2183383	Snx11	ENSMUST00000127375	0.601172	0.00278874	0.0101007	1.51695
A_55_P2118143	Zfp61	ENSMUST00000128421	0.601098	0.013945	0.0349985	1.51687
A_55_P2023697	Zfp386	ENSMUST00000073551	0.600673	2.3694e-05	0.000265727	1.51642
A_55_P1970120	Vopp1	ENSMUST00000114297	0.600554	4.30919e-06	7.1654e-05	1.5163
A_55_P2131899	Sox4	ENSMUST00000067230	0.600345	7.83857e-05	0.000663683	1.51608
A_52_P510215	Traf6	ENSMUST00000004949	0.600311	3.3336e-05	0.000346725	1.51604
A_55_P2070494	Vmn2r60	ENSMUST00000166447	0.600067	0.0045334	0.0146326	1.51579
A_66_P118236	Wdfy1		0.600019	0.000519456	0.00278924	1.51574
A_51_P426633	Dnttip2	ENSMUST00000035776	0.599901	6.15928e-06	9.50335e-05	1.51561
A_55_P2046074	Tmem44	ENSMUST00000125260	0.599798	0.00014956	0.0010826	1.5155
A_51_P423127	Gba	ENSMUST00000077367	0.599777	3.86452e-06	6.63015e-05	1.51548
A_55_P1954856	Pars2	ENSMUST00000058905	0.599755	0.000732836	0.00362973	1.51546
A_51_P127756	Ddx20	ENSMUST00000090680	0.599407	2.61772e-06	4.96425e-05	1.51509
A_52_P467726	Nsg1	ENSMUST00000031009	0.59911	0.00086243	0.00411679	1.51478
A_51_P315904	Gadd45g	ENSMUST00000021903	0.599085	1.21873e-06	2.7594e-05	1.51476
A_52_P514317	Slc35a3	ENSMUST00000029569	0.598792	3.43569e-06	6.0729e-05	1.51445
A_51_P181002	Ccdc132	ENSMUST00000183532	0.598516	2.80252e-05	0.000303888	1.51416
A_55_P2149816	Srsf11	ENSMUST00000089922	0.59823	0.00293307	0.0104909	1.51386
A_55_P2022981			0.598152	0.0497866	0.0958459	1.51378
A_51_P373696	Maml2	ENSMUST00000034401	0.59806	0.000417942	0.00236881	1.51368
A_55_P2045521	Rbms3	ENSMUST00000069095	0.597852	5.27556e-05	0.000486975	1.51346
A_66_P116807	Selt	ENSMUST00000107924	0.597747	3.42315e-05	0.000353442	1.51335
A_55_P1974283	Rbmx	ENSMUST00000114726	0.59687	3.94102e-06	6.73132e-05	1.51243
A_51_P272553	Bhlhe40	ENSMUST00000032194	0.596291	6.38994e-06	9.7819e-05	1.51182
A_55_P1998995	Speg	ENSMUST00000113590	0.596209	0.000683666	0.00344705	1.51174
A_55_P1973945	Krt75	ENSMUST00000042957	0.596048	0.0287783	0.0618581	1.51157
A_52_P350664	Pygb	ENSMUST00000045441	0.595913	1.21736e-05	0.000158978	1.51143
A_55_P2029294	Cetn4	ENSMUST00000102955	0.595849	0.000336064	0.00200469	1.51136
A_55_P2073845	Mrpl47	ENSMUST00000043966	0.595776	1.34523e-05	0.00017265	1.51129
A_55_P2081137			0.59561	5.86087e-05	0.000528359	1.51111
A_55_P1960187			0.595484	8.21629e-05	0.00068841	1.51098
A_51_P337598	2410131K14Rik	ENSMUST00000049138	0.595129	3.25301e-05	0.000339937	1.51061
A_55_P2214093	2010300F17Rik		0.594985	0.00260536	0.00958865	1.51046
A_55_P2404878	Nup188	ENSMUST00000133603	0.594966	0.00032261	0.00194268	1.51044
A_51_P438859	Pmf1	ENSMUST00000056370	0.594641	2.93936e-05	0.000315499	1.5101
A_52_P33831	Lrrc27	ENSMUST00000126213	0.594139	2.50921e-05	0.000277658	1.50957
A_65_P01065	Phf14	ENSMUST00000115511	0.593974	2.00175e-06	4.05608e-05	1.5094
A_55_P2124096			0.593788	2.68159e-06	5.02799e-05	1.5092
A_55_P1964965	Gm1673	ENSMUST00000142510	0.593786	5.21081e-05	0.000482855	1.5092
A_52_P37091	Magi1		0.593598	0.000262407	0.00165537	1.50901
A_55_P2175195	Stxbp4	ENSMUST00000143203	0.593407	1.9953e-05	0.000232613	1.50881
A_55_P2083028	LOC102642820		0.593146	2.90379e-05	0.000312827	1.50853
A_55_P2121222	Clcc1	ENSMUST00000029483	0.593034	2.09145e-06	4.19845e-05	1.50842
A_51_P374549	Spata1	ENSMUST00000029839	0.592986	7.16738e-05	0.000620006	1.50837
A_55_P2168736	Relb	ENSMUST00000098754	0.59297	9.38065e-05	0.000755488	1.50835
A_52_P246081	Lrrc40	ENSMUST00000072080	0.592831	0.000319198	0.00192643	1.5082
A_51_P334739	Cdon	ENSMUST00000042842	0.592778	1.52033e-05	0.000188891	1.50815
A_52_P368384	Rap2b	ENSMUST00000049064	0.592593	9.95355e-05	0.000789558	1.50795
A_51_P318577	Sult6b1	ENSMUST00000146474	0.592592	0.111121	0.181408	1.50795
A_52_P257041	Nudt6	ENSMUST00000099130	0.592552	0.00197783	0.00775619	1.50791
A_55_P1967332			0.592411	1.11751e-05	0.000148726	1.50776
A_51_P448856	Elf4	ENSMUST00000033429	0.591949	0.000628003	0.00322436	1.50728
A_51_P203192	Mbd4	ENSMUST00000147282	0.5918	0.000102035	0.00080672	1.50713
A_52_P283524	Rcan3	ENSMUST00000030606	0.590775	2.40445e-05	0.000268543	1.50606
A_52_P134639	Tgoln2	ENSMUST00000070524	0.590578	2.96753e-05	0.000317506	1.50585
A_55_P2145942	Atg16l1	ENSMUST00000113190	0.590372	5.68823e-06	8.9683e-05	1.50564
A_51_P114456	Tceanc2	ENSMUST00000057043	0.590347	2.85019e-05	0.000308283	1.50561
A_51_P333965	Cisd2	ENSMUST00000029815	0.590086	0.000146068	0.00106781	1.50534
A_55_P1959648	Hspg2	ENSMUST00000155648	0.590025	1.83136e-05	0.000217947	1.50527
A_52_P201531	Myo9a	ENSMUST00000136740	0.589871	0.00228235	0.00866866	1.50511
A_55_P1979082	Shc1	ENSMUST00000039110	0.589504	5.0029e-07	1.34574e-05	1.50473
A_52_P674414	Mkln1	ENSMUST00000026699	0.589455	3.18346e-06	5.73022e-05	1.50468
A_66_P129263	Lekr1	ENSMUST00000099075	0.589432	0.000266103	0.00167234	1.50465
A_51_P258078	Nop2	ENSMUST00000044200	0.589337	3.52873e-05	0.000362438	1.50456
A_52_P157240	Aqr	ENSMUST00000102543	0.589293	6.15221e-05	0.000550032	1.50451
A_52_P377576	Ap1s3		0.589281	0.00852395	0.023871	1.5045
A_55_P2090880	Stk40	ENSMUST00000116286	0.588978	1.75113e-06	3.6616e-05	1.50418
A_51_P304163	Serac1	ENSMUST00000024570	0.588782	0.000131814	0.00098621	1.50398
A_66_P126492	Brk1	ENSMUST00000035725	0.588702	8.78718e-06	0.000124298	1.50389
A_55_P2155906	Chmp3	ENSMUST00000059462	0.588609	4.80009e-07	1.29927e-05	1.5038
A_66_P132888	Dhfr	ENSMUST00000022218	0.588598	0.001344	0.00579911	1.50378
A_66_P136998	Tmem43	ENSMUST00000032183	0.588469	1.9193e-06	3.92545e-05	1.50365
A_55_P1978336	Tmem170b	ENSMUST00000129449	0.588336	8.04569e-05	0.000677176	1.50351
A_52_P625624	Stau2	ENSMUST00000162435	0.588324	8.35825e-07	2.0507e-05	1.5035
A_55_P2091446	Trim33	ENSMUST00000029444	0.588034	0.000174735	0.00121987	1.5032
A_66_P122099	Zc3h8	ENSMUST00000028866	0.587997	2.24626e-05	0.000255096	1.50316
A_51_P507851	Gcc1	ENSMUST00000090511	0.587984	1.6797e-05	0.000204981	1.50314
A_55_P2055869	Dvl2	ENSMUST00000019362	0.587707	1.76716e-05	0.000212295	1.50286
A_55_P2022364	Nxn	ENSMUST00000021204	0.587702	2.00143e-05	0.00023305	1.50285
A_55_P2151428	Fut9	ENSMUST00000149875	0.587399	0.0154318	0.0378997	1.50254
A_55_P2072955	Zfp954	ENSMUST00000056246	0.587382	0.00044979	0.00250463	1.50252
A_66_P137475	Dnajb14	ENSMUST00000090178	0.587367	2.22461e-05	0.000253169	1.5025
A_55_P1984070	LOC102638184		0.587304	2.29275e-06	4.51032e-05	1.50244
A_55_P1971229	Slc25a36	ENSMUST00000085206	0.58727	4.14681e-05	0.000408814	1.5024
A_66_P138769	Usp19	ENSMUST00000178075	0.586994	0.000476721	0.00262415	1.50211
A_52_P313856	Slc25a26	ENSMUST00000061118	0.586781	4.43361e-05	0.0004287	1.50189
A_55_P2032192	Tpm1	ENSMUST00000139046	0.586403	4.33037e-05	0.000422285	1.5015
A_51_P135939	Rnf219	ENSMUST00000022716	0.586369	0.000211179	0.00139967	1.50146
A_55_P2377527	Gbf1	ENSMUST00000177406	0.586304	0.00100621	0.00464406	1.5014
A_52_P174421	Galc	ENSMUST00000021390	0.586118	0.00265612	0.00972906	1.5012
A_55_P2118586	Cnot4	ENSMUST00000114993	0.585713	0.00244478	0.00913777	1.50078
A_55_P2044282	Mpp6	ENSMUST00000036225	0.585513	9.65202e-05	0.000771019	1.50057
A_51_P357573	Cald1	ENSMUST00000149009	0.585452	3.21648e-06	5.75647e-05	1.50051
A_51_P313157	Arhgef5	ENSMUST00000183313	0.585443	1.07822e-05	0.000144119	1.5005
A_55_P1979217	Abtb1	ENSMUST00000032169	0.585131	2.59652e-05	0.000285041	1.50018
A_55_P2392365	D930001B02		0.584889	0.00798363	0.0226626	1.49992
A_52_P48777	Copg2	ENSMUST00000048774	0.584874	2.23482e-05	0.000254064	1.49991
A_55_P2157360	Tagap1	ENSMUST00000063683	0.584757	1.87617e-05	0.000221935	1.49979
A_55_P2097178	Idua	ENSMUST00000112563	0.584646	0.00352277	0.0120341	1.49967
A_51_P483351	Lix1l	ENSMUST00000062058	0.584639	5.71554e-06	8.98608e-05	1.49966
A_51_P125260	Acaa2	ENSMUST00000041053	0.584583	1.03996e-06	2.439e-05	1.4996
A_55_P2027836	Tnfrsf10b	ENSMUST00000022663	0.584542	2.4354e-05	0.000271298	1.49956
A_51_P307168	Ddah1	ENSMUST00000029845	0.584383	5.14032e-05	0.000477963	1.4994
A_55_P2055482	Zscan26	ENSMUST00000032820	0.584001	0.00121601	0.00537354	1.499
A_51_P502957	Stxbp4	ENSMUST00000143203	0.583934	1.15875e-05	0.000152616	1.49893
A_55_P1995045	Zc3hav1	ENSMUST00000031850	0.583818	0.000501786	0.00272443	1.49881
A_51_P318381	Pgf	ENSMUST00000004913	0.583498	2.74748e-06	5.11522e-05	1.49848
A_55_P2003483	Gldc	ENSMUST00000025778	0.583493	0.00143142	0.00607919	1.49847
A_66_P119636	Smc5	ENSMUST00000087556	0.583348	0.000436484	0.00244631	1.49832
A_55_P2088870	Zbtb37	ENSMUST00000159250	0.583325	0.00271899	0.0098989	1.4983
A_51_P396643	Ncstn	ENSMUST00000122986	0.583273	3.45114e-05	0.000356161	1.49824
A_52_P131458	Ttc39b	ENSMUST00000030205	0.583041	3.46682e-05	0.000357347	1.498
A_66_P140307			0.58217	4.83406e-05	0.000457963	1.4971
A_55_P1999648	Plin2	ENSMUST00000138605	0.581698	1.02291e-05	0.000139136	1.49661
A_52_P674165	Rsbn1l	ENSMUST00000036489	0.581322	0.00108739	0.00493542	1.49622
A_55_P2149363	6430548M08Rik	ENSMUST00000108950	0.581265	0.00088469	0.00420077	1.49616
A_55_P2017636	Thbs1	ENSMUST00000039559	0.581191	0.00127612	0.00556405	1.49608
A_55_P2106250	Trappc6a	ENSMUST00000136873	0.580609	4.94694e-06	7.99207e-05	1.49548
A_51_P469968	H2-M3	ENSMUST00000038580	0.580486	1.46153e-05	0.00018354	1.49535
A_52_P603421	Gm166	ENSMUST00000072155	0.580474	3.10791e-05	0.000328168	1.49534
A_52_P75866	Akap10	ENSMUST00000058173	0.580404	0.0173643	0.0415957	1.49527
A_52_P649296	Nras	ENSMUST00000029445	0.580306	4.91084e-07	1.32593e-05	1.49517
A_55_P2145371			0.58029	0.000802399	0.00389226	1.49515
A_51_P155522	Psmb4	ENSMUST00000134133	0.580239	1.13975e-06	2.61899e-05	1.4951
A_55_P2037528	Acsf3	ENSMUST00000015160	0.580019	4.39689e-05	0.000427036	1.49487
A_51_P184223	Pcdhb7	ENSMUST00000053037	0.580002	0.00771528	0.022067	1.49485
A_51_P466829	Fam109a	ENSMUST00000056654	0.5799	3.22587e-05	0.000337264	1.49475
A_51_P239750	Inhba	ENSMUST00000042603	0.579724	0.00012338	0.000933452	1.49456
A_55_P2185372	Sirt4	ENSMUST00000112067	0.579645	0.000187322	0.00128286	1.49448
A_55_P1956652	Sfmbt2	ENSMUST00000114864	0.57958	0.00496332	0.0156853	1.49441
A_52_P655265	Bora	ENSMUST00000022656	0.579562	0.00146566	0.00618445	1.4944
A_51_P314264	Ssr2	ENSMUST00000035785	0.579447	7.97625e-05	0.000672996	1.49428
A_52_P242445	Fam149b	ENSMUST00000037698	0.579078	8.20325e-05	0.000688297	1.49389
A_66_P113416	9130011E15Rik	ENSMUST00000045396	0.578993	0.000473309	0.00260803	1.49381
A_51_P209736	Atoh8	ENSMUST00000042646	0.578859	1.14495e-05	0.000151167	1.49367
A_55_P2138792	Fdx1	ENSMUST00000034552	0.578545	6.46128e-06	9.86315e-05	1.49334
A_55_P2057557	Zfp12	ENSMUST00000077485	0.5783	0.00269244	0.00982931	1.49309
A_55_P2077974	Vps8	ENSMUST00000150765	0.57779	0.000397211	0.0022764	1.49256
A_55_P2057247	Etohi1		0.577611	3.94059e-05	0.000391341	1.49238
A_55_P2152872	Fgfrl1	ENSMUST00000013633	0.577524	5.58136e-05	0.000507824	1.49229
A_52_P500077	Zfp551	ENSMUST00000080348	0.577392	0.000299162	0.0018316	1.49215
A_52_P9260	Fam149b	ENSMUST00000090499	0.577222	0.000369716	0.00216595	1.49197
A_55_P2045083			0.577199	0.000423482	0.00239331	1.49195
A_55_P2185722	Fermt2	ENSMUST00000045905	0.577041	5.00387e-06	8.06594e-05	1.49179
A_52_P551903	Slc33a1	ENSMUST00000029402	0.576921	0.00427366	0.0139882	1.49166
A_52_P366772	Cipc	ENSMUST00000038369	0.576632	4.4879e-05	0.000432569	1.49136
A_55_P2034979	Vav2	ENSMUST00000056176	0.576603	7.33657e-05	0.000631103	1.49133
A_55_P2172022	B4galt1	ENSMUST00000108096	0.576565	5.17838e-05	0.000480262	1.49129
A_51_P192162	Diap2	ENSMUST00000167619	0.576468	1.48828e-05	0.000185927	1.49119
A_55_P2088912	Gapdh	ENSMUST00000182115	0.576325	1.95234e-05	0.000228468	1.49105
A_55_P2175272	LOC102638184		0.576119	8.13078e-07	2.01174e-05	1.49083
A_51_P104430	Magee1	ENSMUST00000033578	0.575877	5.26595e-05	0.000486295	1.49058
A_55_P2399688	Glipr2	ENSMUST00000030202	0.575832	9.54594e-05	0.000765376	1.49054
A_51_P348456	Rest	ENSMUST00000080359	0.575764	3.72188e-05	0.00037514	1.49047
A_55_P2037424			0.575639	0.000137887	0.00101928	1.49034
A_51_P399845	Fgf2	ENSMUST00000038885	0.575253	6.96301e-06	0.000104663	1.48994
A_51_P271603	Hps1	ENSMUST00000159974	0.575196	0.000441617	0.00246931	1.48988
A_55_P2014332	Cntln	ENSMUST00000107190	0.575172	0.00249748	0.00928335	1.48985
A_55_P1980746	Dram2	ENSMUST00000117469	0.574893	4.32431e-05	0.000422176	1.48957
A_66_P111217			0.574888	2.93938e-06	5.39427e-05	1.48956
A_55_P2179335	Usp33	ENSMUST00000117492	0.574877	5.63962e-06	8.89816e-05	1.48955
A_51_P455366	Ankrd27		0.574769	0.00129027	0.00561457	1.48944
A_55_P1989384	Rnf181	ENSMUST00000126065	0.57433	3.78713e-07	1.07776e-05	1.48899
A_52_P158376	Cpa4	ENSMUST00000049251	0.574074	0.000925383	0.00434528	1.48872
A_66_P138308	Cndp2	ENSMUST00000168419	0.574026	0.00454288	0.0146566	1.48867
A_55_P2086510	Ppid	ENSMUST00000029382	0.573721	5.14706e-05	0.000477973	1.48836
A_51_P273433	Prkg2	ENSMUST00000162147	0.573498	1.13981e-05	0.000150815	1.48813
A_51_P163958	Spr	ENSMUST00000045986	0.573457	9.95809e-06	0.000136568	1.48809
A_55_P2179348	Mapk14	ENSMUST00000062694	0.573286	0.0002361	0.00152344	1.48791
A_55_P2131473	Rmnd5a	ENSMUST00000140696	0.573284	5.67275e-05	0.000513974	1.48791
A_55_P2404733	LOC552909		0.573278	0.000413302	0.00235115	1.4879
A_51_P101858	Dlg1	ENSMUST00000115201	0.573179	1.32085e-05	0.000170228	1.4878
A_55_P1953043	E130311K13Rik	ENSMUST00000061706	0.573135	2.99021e-06	5.46035e-05	1.48775
A_51_P168524	Mob1a	ENSMUST00000101245	0.573058	0.000153531	0.00110543	1.48767
A_51_P440790	Dpp7	ENSMUST00000028332	0.572965	7.36161e-07	1.85327e-05	1.48758
A_55_P2138333	Mad2l1	ENSMUST00000101343	0.572404	1.13907e-05	0.000150815	1.487
A_55_P1962344	Trim21	ENSMUST00000033264	0.572299	0.000429655	0.00241796	1.48689
A_52_P278204	Atxn3	ENSMUST00000021606	0.572251	0.00673773	0.0197791	1.48684
A_55_P2041360	Lrp6	ENSMUST00000032322	0.572064	1.66108e-05	0.000203267	1.48665
A_55_P2106175	Gch1	ENSMUST00000089959	0.571931	0.000783681	0.00382715	1.48651
A_55_P2021231	Zfp248	ENSMUST00000069292	0.571817	4.56936e-05	0.000437543	1.48639
A_51_P260658	Amdhd2	ENSMUST00000130520	0.571796	0.000379267	0.00220516	1.48637
A_55_P1957419	Ensa	ENSMUST00000058230	0.571744	4.0061e-05	0.000396389	1.48632
A_55_P2097391	Fam46a	ENSMUST00000034802	0.571584	0.00148926	0.00625957	1.48615
A_52_P613643	Zfp3	ENSMUST00000060444	0.571295	8.75437e-05	0.000718441	1.48586
A_55_P2277019	Loxl3	ENSMUST00000000707	0.570978	4.11439e-06	6.91736e-05	1.48553
A_52_P229210			0.570767	7.20779e-05	0.000622504	1.48531
A_55_P1989524	Fndc1	ENSMUST00000097424	0.570651	0.00181367	0.0072803	1.48519
A_51_P284793	Ints12	ENSMUST00000029650	0.570493	6.60468e-05	0.000582528	1.48503
A_55_P1997628			0.570383	1.39827e-05	0.000177663	1.48492
A_55_P1989921	Eml2	ENSMUST00000120595	0.570077	1.01465e-05	0.000138617	1.4846
A_55_P1957900	Dlg1	ENSMUST00000115196	0.569968	3.37229e-05	0.000349312	1.48449
A_52_P320279	Inca1	ENSMUST00000108543	0.569933	0.00118595	0.00528502	1.48446
A_55_P2135261	Ccdc174		0.569826	1.90817e-05	0.000224613	1.48434
A_55_P1982156	Nelfcd	ENSMUST00000016397	0.569692	0.00108178	0.00491881	1.48421
A_55_P2051414	Axl	ENSMUST00000002677	0.569197	5.82777e-05	0.000525814	1.4837
A_51_P381618	Pla1a	ENSMUST00000002926	0.568808	8.56663e-05	0.000707878	1.4833
A_52_P517001	Rpf1	ENSMUST00000029838	0.568779	1.55094e-05	0.000191869	1.48327
A_55_P2014973			0.568607	0.00263991	0.00968524	1.48309
A_55_P2025712	Immt	ENSMUST00000064062	0.568584	1.4417e-06	3.15829e-05	1.48307
A_55_P1982793	Notch2	ENSMUST00000079812	0.568578	3.58187e-05	0.000365872	1.48306
A_51_P239036	Ubn2	ENSMUST00000159925	0.568352	2.3912e-06	4.63643e-05	1.48283
A_55_P2011545	Pyroxd1	ENSMUST00000041852	0.56828	8.37865e-05	0.000696876	1.48275
A_55_P1985259	C2cd3	ENSMUST00000098259	0.568256	8.61952e-05	0.000710888	1.48273
A_55_P1967840	Kctd10	ENSMUST00000134173	0.568208	0.000133521	0.00099656	1.48268
A_55_P1967837	Tmem198	ENSMUST00000050899	0.568091	0.000130245	0.000977857	1.48256
A_51_P366061	Fscn1	ENSMUST00000031565	0.568078	2.74442e-06	5.11471e-05	1.48255
A_51_P338262	Tnnt2	ENSMUST00000178204	0.568054	0.010655	0.0283433	1.48252
A_55_P2157992			0.567994	1.33323e-05	0.000171619	1.48246
A_51_P393078	Tigd2	ENSMUST00000062626	0.567978	8.25522e-06	0.000118402	1.48244
A_55_P2016105	Errfi1	ENSMUST00000073600	0.567888	9.8592e-05	0.000783488	1.48235
A_51_P104933	Trub2	ENSMUST00000048044	0.567841	7.16399e-05	0.000619961	1.4823
A_55_P2094906			0.567659	0.000218379	0.00143504	1.48212
A_52_P367745	Acads	ENSMUST00000131726	0.567608	2.44023e-05	0.000271505	1.48206
A_55_P2069885	Slc50a1	ENSMUST00000144777	0.567362	5.80642e-06	9.0949e-05	1.48181
A_55_P2089840	Eif2d	ENSMUST00000068805	0.567318	9.01829e-06	0.000126902	1.48177
A_65_P11193	Flad1	ENSMUST00000107426	0.567313	2.43772e-06	4.70132e-05	1.48176
A_55_P2015767	Yipf6	ENSMUST00000054697	0.567253	0.00258047	0.00952464	1.4817
A_52_P425860	Iqsec1	ENSMUST00000101151	0.567044	9.56705e-06	0.000132807	1.48148
A_52_P684130	2510002D24Rik	ENSMUST00000055413	0.566781	0.000240892	0.00155044	1.48121
A_55_P2070331	5830416P10Rik		0.566494	5.59454e-05	0.000508595	1.48092
A_55_P2002472	Zfp777	ENSMUST00000114583	0.566272	0.000262946	0.00165683	1.48069
A_52_P255250	Rnf103	ENSMUST00000150069	0.566258	3.80117e-05	0.000381353	1.48068
A_55_P1996299	Pofut1	ENSMUST00000049863	0.566132	6.17139e-05	0.00055129	1.48055
A_66_P119174	Cmtm6	ENSMUST00000035007	0.566068	3.82239e-05	0.000382948	1.48048
A_51_P135004	Zfp212	ENSMUST00000009411	0.566025	9.3651e-07	2.24373e-05	1.48044
A_55_P1961210	Trp53inp2	ENSMUST00000043237	0.565603	1.90422e-06	3.90238e-05	1.48001
A_52_P363216	Gcnt2	ENSMUST00000069958	0.565556	0.000188982	0.00129096	1.47996
A_51_P314701	Cyth1	ENSMUST00000100181	0.565543	0.0020185	0.0078785	1.47994
A_66_P135742	Wdr1	ENSMUST00000005234	0.565387	6.27923e-06	9.63975e-05	1.47978
A_51_P449048	Cndp2	ENSMUST00000168419	0.565326	7.21478e-05	0.000622858	1.47972
A_51_P174720	Ccdc43	ENSMUST00000164506	0.565152	0.00378553	0.0127265	1.47954
A_66_P125660	Nde1	ENSMUST00000127801	0.565146	0.000196477	0.00133121	1.47954
A_55_P1971174	Cd1d2	ENSMUST00000041920	0.56507	0.0045631	0.0147153	1.47946
A_52_P117999	Selt	ENSMUST00000125815	0.564711	1.75472e-05	0.000211385	1.47909
A_55_P2426272	Scaper	ENSMUST00000037408	0.564136	1.13354e-05	0.000150211	1.4785
A_51_P104820	Alkbh5	ENSMUST00000044250	0.563896	0.00200875	0.00785606	1.47826
A_52_P159050	Cds2		0.563895	0.00254465	0.00942728	1.47825
A_55_P2009910	Stxbp3a	ENSMUST00000102621	0.563816	9.50208e-06	0.000132331	1.47817
A_55_P2092526	Tgif1	ENSMUST00000118283	0.563814	5.09416e-06	8.17488e-05	1.47817
A_55_P2080895	Rab7	ENSMUST00000095048	0.563704	1.87185e-05	0.00022166	1.47806
A_55_P2168497	Slc9a1	ENSMUST00000030669	0.56365	0.00533758	0.016572	1.478
A_51_P137007	Zw10	ENSMUST00000034803	0.563207	3.11125e-05	0.0003283	1.47755
A_52_P18267	Brca1	ENSMUST00000017290	0.563126	0.0007435	0.00367245	1.47747
A_51_P441974	Pip5k1a	ENSMUST00000107236	0.562987	6.69603e-05	0.000588183	1.47733
A_55_P2157610	Rpusd3	ENSMUST00000113092	0.562921	6.56588e-06	9.98753e-05	1.47726
A_55_P1980237	Acad11	ENSMUST00000047799	0.562875	7.12217e-05	0.00061771	1.47721
A_55_P2054540	Crebbp		0.562756	0.00204926	0.00797118	1.47709
A_55_P2026748	Zmat1	ENSMUST00000151252	0.56268	0.000846483	0.00406312	1.47701
A_55_P2009086	Creb3l1	ENSMUST00000028663	0.562638	0.00123603	0.00543751	1.47697
A_55_P1988678	Znhit6	ENSMUST00000098534	0.56254	1.76589e-05	0.00021226	1.47687
A_55_P2134571	Gm4944	ENSMUST00000179996	0.562534	0.000665567	0.00337519	1.47686
A_52_P565165	Gcfc2	ENSMUST00000152996	0.562497	0.000811988	0.00393074	1.47682
A_52_P481957	Grem1	ENSMUST00000099575	0.562353	0.000607225	0.00314082	1.47668
A_52_P161630	St6gal1	ENSMUST00000023601	0.562143	0.000301019	0.00183881	1.47646
A_51_P296608	Gadd45a	ENSMUST00000043098	0.562054	1.9549e-05	0.000228619	1.47637
A_55_P2166421	Rpusd3	ENSMUST00000113092	0.561912	1.02402e-05	0.000139199	1.47622
A_55_P2074174	Cpt2	ENSMUST00000175651	0.561709	0.000274566	0.0017101	1.47602
A_51_P155073	Nudt14	ENSMUST00000002881	0.561681	1.74184e-05	0.000210189	1.47599
A_51_P257684	Stau1	ENSMUST00000109236	0.561618	1.58496e-05	0.000195518	1.47592
A_51_P400016	Kalrn	ENSMUST00000142817	0.56135	5.01377e-05	0.000470443	1.47565
A_55_P2074317	Ap2b1	ENSMUST00000018875	0.561041	0.000161468	0.00114576	1.47533
A_66_P126523	Phb2	ENSMUST00000129422	0.560997	5.13667e-06	8.22476e-05	1.47529
A_55_P2425437	D030036P13Rik		0.560747	0.000155237	0.00111547	1.47503
A_55_P2102050	Cc2d1b	ENSMUST00000106665	0.560726	7.07321e-06	0.000105731	1.47501
A_55_P2070611	Zfp59	ENSMUST00000108331	0.560455	0.000557834	0.00294171	1.47473
A_55_P2313861	Zbed6	ENSMUST00000179598	0.560327	0.000879073	0.00418238	1.4746
A_55_P2066103	Hoxa9	ENSMUST00000048680	0.560302	8.4327e-05	0.000699487	1.47458
A_55_P2054744	Sh3bgrl2	ENSMUST00000113215	0.560125	0.00218932	0.00838018	1.4744
A_55_P2076861	Sema6d	ENSMUST00000103238	0.560048	0.0916089	0.155623	1.47432
A_52_P88529	Pxylp1	ENSMUST00000121077	0.559955	0.00128701	0.00560361	1.47422
A_55_P2054739	Polr3c	ENSMUST00000154679	0.559906	9.94718e-06	0.000136505	1.47417
A_55_P2157019	Phb2	ENSMUST00000004375	0.559872	1.67482e-05	0.000204501	1.47414
A_55_P2034828			0.559719	0.000198044	0.00133931	1.47398
A_51_P104897	Itpr3	ENSMUST00000049308	0.559518	7.99878e-06	0.000115878	1.47378
A_55_P2136556	Pkn2	ENSMUST00000043812	0.559445	0.000562892	0.00296115	1.4737
A_55_P2169645	Usf1	ENSMUST00000001284	0.559377	0.000710664	0.00354763	1.47363
A_55_P2157751	Stk35	ENSMUST00000165413	0.559089	2.86572e-05	0.000309653	1.47334
A_55_P2009988	Trib3	ENSMUST00000040312	0.559049	0.00262438	0.00964588	1.4733
A_55_P1956837	Rnf157	ENSMUST00000149682	0.559027	9.09637e-05	0.000738739	1.47327
A_51_P427663	Cnn2	ENSMUST00000004784	0.558962	0.000123246	0.000932765	1.47321
A_55_P1978618	Grcc10	ENSMUST00000129411	0.558833	2.26287e-05	0.000255906	1.47308
A_51_P329541	Nckipsd	ENSMUST00000035218	0.558828	6.24257e-05	0.000556269	1.47307
A_55_P2040763	Sec62	ENSMUST00000029256	0.558783	5.4294e-05	0.000497772	1.47303
A_51_P255682	Mfge8	ENSMUST00000032825	0.558555	0.000132203	0.000988431	1.47279
A_51_P348183	Tmem141	ENSMUST00000150165	0.558077	4.51134e-06	7.41591e-05	1.47231
A_55_P2178486	Spin1	ENSMUST00000095797	0.557833	4.75531e-05	0.000452687	1.47206
A_55_P2124923	Gm10436	ENSMUST00000071580	0.557503	0.00100909	0.00465632	1.47172
A_52_P114810	Hltf	ENSMUST00000128127	0.557426	9.07469e-06	0.00012753	1.47164
A_52_P522379	Zak	ENSMUST00000150126	0.557334	5.15616e-05	0.000478612	1.47155
A_52_P639229	Fgd4	ENSMUST00000161861	0.557297	0.050979	0.0975502	1.47151
A_52_P78875	Phf12	ENSMUST00000141620	0.557056	4.59316e-05	0.000439187	1.47126
A_55_P2061268	Rnpc3	ENSMUST00000174147	0.557011	2.2186e-05	0.000252724	1.47122
A_52_P676461	Lpgat1	ENSMUST00000110855	0.556962	0.000564958	0.00296912	1.47117
A_55_P2023484	Osbpl5	ENSMUST00000020411	0.556757	1.82727e-05	0.00021758	1.47096
A_55_P1975510	H6pd	ENSMUST00000030830	0.556585	0.000197193	0.00133523	1.47078
A_52_P420663	Klhl11	ENSMUST00000056665	0.556395	0.00186041	0.00742927	1.47059
A_51_P123676	Synpo	ENSMUST00000128528	0.556063	1.86276e-05	0.000220833	1.47025
A_55_P2113723	Pecr	ENSMUST00000097698	0.556043	1.35906e-05	0.000174011	1.47023
A_55_P2124554	Cep41	ENSMUST00000031810	0.555947	0.000575981	0.00301971	1.47013
A_55_P1955841	Ctsa	ENSMUST00000103093	0.555882	2.52194e-05	0.000278496	1.47007
A_55_P2075469	Baalc		0.555786	0.0034652	0.0118826	1.46997
A_51_P463428	Pik3ip1	ENSMUST00000045153	0.555737	4.45363e-05	0.000429945	1.46992
A_55_P2415930	2900064F13Rik		0.555354	0.000105793	0.000830047	1.46953
A_66_P107703	Smox	ENSMUST00000183881	0.555304	1.40286e-05	0.000177993	1.46948
A_55_P1980539	Cetn4	ENSMUST00000178379	0.555298	0.0017678	0.00713596	1.46947
A_52_P476699	Gemin4	ENSMUST00000102500	0.55503	5.90161e-06	9.21727e-05	1.4692
A_55_P2192729	5830469G19Rik		0.554748	0.0043661	0.0142116	1.46891
A_55_P2165293	Atrn	ENSMUST00000028781	0.554708	0.000163286	0.00115543	1.46887
A_55_P1994000	Snx16	ENSMUST00000029047	0.554344	0.00206204	0.00801158	1.4685
A_55_P2184796	Pcdhb18	ENSMUST00000055949	0.554328	0.0101415	0.0273001	1.46848
A_55_P2028758	Isg20l2	ENSMUST00000055984	0.554325	0.00197434	0.00774674	1.46848
A_51_P296328	Ahcyl1	ENSMUST00000144864	0.554232	8.51722e-05	0.000704943	1.46839
A_51_P379710	Rpn1	ENSMUST00000032143	0.554139	0.000297959	0.00182683	1.46829
A_55_P1979927	Vps52	ENSMUST00000172558	0.553986	0.000149236	0.00108099	1.46814
A_55_P1977096	Elk4		0.553879	0.00044569	0.00248822	1.46803
A_55_P2038126	Tpmt	ENSMUST00000136864	0.553435	0.00104829	0.00480367	1.46758
A_55_P2159860	Zfp58	ENSMUST00000076123	0.553434	0.00512079	0.0160606	1.46757
A_52_P96782	Wasl	ENSMUST00000041737	0.553354	5.69289e-06	8.96911e-05	1.46749
A_55_P2178343	Rap1gds1	ENSMUST00000098574	0.553279	8.01518e-07	1.99456e-05	1.46742
A_52_P551011	Smim1	ENSMUST00000146054	0.553005	0.000205546	0.00137158	1.46714
A_55_P1987261	Fam214b	ENSMUST00000107958	0.552946	1.79304e-05	0.000214806	1.46708
A_55_P2055442	Pafah2	ENSMUST00000105870	0.552932	0.000147954	0.00107445	1.46706
A_52_P315976	Tpm2	ENSMUST00000150262	0.552819	3.05535e-05	0.000324056	1.46695
A_52_P408657	Mycbp	ENSMUST00000030400	0.552519	0.000616178	0.00317436	1.46664
A_55_P1976494	Ccdc176	ENSMUST00000081828	0.552509	7.2925e-05	0.000628062	1.46663
A_52_P295755	A830005F24Rik		0.552431	0.000256423	0.00162734	1.46656
A_66_P139460	Mia3	ENSMUST00000069922	0.552386	5.53057e-05	0.000505321	1.46651
A_55_P2065050			0.552107	5.25449e-05	0.000485693	1.46623
A_51_P507622	Itpkc	ENSMUST00000003850	0.552092	0.000515833	0.00277507	1.46621
A_66_P101879	Cyp2u1		0.551975	0.00119617	0.00531099	1.46609
A_51_P311785	Man2b2	ENSMUST00000031002	0.551805	0.00139312	0.00595634	1.46592
A_55_P1961809	Adra1d	ENSMUST00000103184	0.551779	0.000157101	0.0011255	1.46589
A_55_P2015842	Mtmr3	ENSMUST00000128256	0.551739	0.000135871	0.00100992	1.46585
A_52_P350950	Dennd2c	ENSMUST00000173037	0.551276	0.00064384	0.00328692	1.46538
A_52_P27332	Ppp2r5c	ENSMUST00000084985	0.551269	1.7202e-05	0.00020886	1.46537
A_52_P499028	9130008F23Rik	ENSMUST00000068258	0.550779	5.37113e-05	0.000493897	1.46488
A_51_P481693	Ero1l	ENSMUST00000022378	0.55075	0.000227895	0.0014818	1.46485
A_55_P2063029	Phc2	ENSMUST00000120946	0.550517	0.000586525	0.00305423	1.46461
A_51_P259555	Gpatch3	ENSMUST00000030662	0.550194	2.82326e-05	0.000305677	1.46428
A_55_P2064917	Lrrcc1	ENSMUST00000108370	0.549945	0.00153384	0.00640088	1.46403
A_52_P148678	Plcg1	ENSMUST00000109462	0.549942	2.53919e-05	0.00027983	1.46403
A_55_P1992329	Gmpr	ENSMUST00000000260	0.549925	8.59315e-05	0.000709526	1.46401
A_52_P370402	Kcmf1	ENSMUST00000068697	0.549924	9.84639e-05	0.000782783	1.46401
A_51_P145415	Lpcat3	ENSMUST00000130020	0.54985	3.6801e-05	0.000372681	1.46393
A_55_P2157799	Myo7b	ENSMUST00000134663	0.5493	0.00413031	0.0136247	1.46338
A_55_P2003658	Gnpda1	ENSMUST00000063814	0.54926	2.20843e-05	0.000251859	1.46333
A_52_P355197	Gdap2	ENSMUST00000106997	0.549057	0.000146975	0.00107123	1.46313
A_66_P112855	AI413582	ENSMUST00000138728	0.548951	4.41951e-06	7.30386e-05	1.46302
A_51_P411264	Txndc16	ENSMUST00000123879	0.548894	3.0844e-06	5.58224e-05	1.46296
A_52_P670978	Nkain1		0.548879	0.000137056	0.00101558	1.46295
A_51_P229886	Fpgt	ENSMUST00000066568	0.548551	0.0001784	0.00123891	1.46262
A_51_P216605	Hbp1	ENSMUST00000167458	0.548401	4.15863e-05	0.000409419	1.46246
A_52_P285992	Arfgap2	ENSMUST00000080008	0.548336	0.000883951	0.0041988	1.4624
A_55_P2186928			0.548313	0.00241168	0.00904224	1.46237
A_51_P254425	Ahrr	ENSMUST00000022059	0.548291	0.000277452	0.00172345	1.46235
A_51_P441469	Jmy	ENSMUST00000065537	0.54817	0.000327614	0.00196459	1.46223
A_55_P2033580	Mmab	ENSMUST00000031560	0.54811	5.40547e-05	0.00049621	1.46217
A_52_P430934	Dcun1d1	ENSMUST00000123312	0.547966	6.66394e-05	0.000586557	1.46202
A_52_P92472			0.547838	0.000464605	0.00257056	1.46189
A_52_P292232	Rnf115	ENSMUST00000029740	0.547786	0.000109008	0.000847058	1.46184
A_55_P2026325			0.547496	0.00156764	0.00650391	1.46155
A_51_P379660	Mllt11	ENSMUST00000065482	0.547289	9.32499e-06	0.000130284	1.46134
A_52_P386215	Fktn	ENSMUST00000107638	0.546945	0.00608108	0.0182864	1.46099
A_55_P1961414			0.546766	0.000110917	0.000859016	1.46081
A_52_P373846	Pcgf3	ENSMUST00000046975	0.546691	0.000119367	0.00090914	1.46073
A_55_P1973906	Trp53inp1	ENSMUST00000132346	0.546571	0.000967206	0.00450057	1.46061
A_52_P585652	Fndc3b	ENSMUST00000046157	0.546277	9.09764e-05	0.000738739	1.46031
A_55_P2109539	Trnt1	ENSMUST00000113248	0.546096	0.000876721	0.00417578	1.46013
A_55_P2010066	Capn3	ENSMUST00000110721	0.545887	0.000153315	0.00110423	1.45992
A_55_P2151832		ENSMUST00000178184	0.545851	0.000927477	0.00435227	1.45988
A_55_P2182077			0.545823	2.27228e-05	0.000256701	1.45985
A_51_P163079	Ptcd1	ENSMUST00000031628	0.545819	0.0112558	0.0295738	1.45985
A_55_P2017082	Hnrnpa2b1	ENSMUST00000090002	0.545494	2.38465e-06	4.62886e-05	1.45952
A_52_P233441	Gata2	ENSMUST00000015197	0.544568	0.000644905	0.00328924	1.45858
A_55_P2125588	Pdgfa	ENSMUST00000110896	0.544482	2.1479e-05	0.000246518	1.4585
A_55_P1993353	Slc44a5	ENSMUST00000144677	0.544365	0.0120949	0.0312993	1.45838
A_52_P355014	Rbm8a	ENSMUST00000048915	0.544325	6.5863e-05	0.000581477	1.45834
A_51_P384629	Ctsd	ENSMUST00000066401	0.544232	4.49359e-05	0.000432924	1.45824
A_55_P2037121	Tmem106a	ENSMUST00000107194	0.544184	2.26545e-05	0.000256064	1.4582
A_52_P539434	Lbh	ENSMUST00000024857	0.544068	1.8535e-05	0.000219976	1.45808
A_52_P433643	Igsf11	ENSMUST00000023478	0.543943	0.00761237	0.0218363	1.45795
A_55_P2060072	Clk2	ENSMUST00000138822	0.543887	0.000501876	0.00272443	1.45789
A_55_P1963533	Pcdhac2	ENSMUST00000047479	0.543748	0.039008	0.078782	1.45775
A_52_P383862	Cmc1	ENSMUST00000044220	0.543679	2.88347e-06	5.30067e-05	1.45769
A_52_P227880	Cenpf	ENSMUST00000171929	0.543642	0.000479079	0.00263244	1.45765
A_66_P136364			0.543588	8.91736e-06	0.000125783	1.45759
A_55_P2023988	LOC102639251		0.543509	0.00793357	0.0225421	1.45751
A_55_P2110355	Zfp637	ENSMUST00000112860	0.543296	3.62029e-05	0.000367992	1.4573
A_52_P676063	Tmem126b	ENSMUST00000123622	0.543235	2.03844e-05	0.000236849	1.45724
A_51_P482148	Mecom	ENSMUST00000108270	0.543194	3.79074e-05	0.000380617	1.4572
A_51_P423825	Morn1	ENSMUST00000030915	0.542926	0.00974358	0.0264532	1.45692
A_51_P258409	Hey1	ENSMUST00000042412	0.542789	0.00826186	0.023288	1.45679
A_51_P322871	Sh3bp4	ENSMUST00000066279	0.542777	0.000335344	0.00200192	1.45677
A_55_P2064043	Cd44	ENSMUST00000005218	0.542734	1.52652e-05	0.00018939	1.45673
A_55_P2068882	Ccng2	ENSMUST00000121127	0.542716	5.55547e-05	0.000506535	1.45671
A_55_P2032024	Uggt2	ENSMUST00000173470	0.542685	0.000141034	0.00103794	1.45668
A_55_P2139587			0.542158	0.00010739	0.000838318	1.45615
A_55_P2012430			0.541898	0.000424864	0.00239765	1.45589
A_55_P2116315	Trim45	ENSMUST00000037409	0.541855	5.4668e-06	8.6571e-05	1.45584
A_55_P2128324	Ubap2l	ENSMUST00000064639	0.541643	8.5796e-06	0.00012184	1.45563
A_55_P1980854	Ankrd24	ENSMUST00000154707	0.541562	0.000237942	0.00153328	1.45555
A_52_P290725	Arfgef2	ENSMUST00000099078	0.541447	0.000511733	0.00276129	1.45543
A_55_P2452259	Gls	ENSMUST00000114510	0.541437	0.000564381	0.00296681	1.45542
A_52_P482203	Tsen2	ENSMUST00000040234	0.541345	9.65999e-06	0.00013384	1.45533
A_51_P226364	Coa3	ENSMUST00000017332	0.54124	2.08496e-06	4.18931e-05	1.45522
A_55_P2159309	Synpo2	ENSMUST00000106426	0.541229	0.00578251	0.0176167	1.45521
A_52_P158710	Dcbld1	ENSMUST00000069004	0.541196	1.03854e-05	0.000140466	1.45518
A_55_P1978675			0.540865	4.2398e-05	0.000416082	1.45484
A_51_P369311	Nox4	ENSMUST00000136577	0.540711	0.0110587	0.0291807	1.45469
A_66_P103957	Bbs7	ENSMUST00000108156	0.540606	2.26674e-06	4.46729e-05	1.45458
A_55_P2076288	Zfp661	ENSMUST00000110368	0.540545	9.93217e-05	0.000788151	1.45452
A_51_P185524	Zfp935		0.540511	0.00112485	0.00506712	1.45449
A_52_P25812	Prdm2	ENSMUST00000105778	0.540333	2.06323e-05	0.000239086	1.45431
A_55_P2176802	Hipk1	ENSMUST00000029438	0.540241	2.66608e-06	5.0076e-05	1.45422
A_55_P2038867	Mcat	ENSMUST00000061882	0.540228	7.19217e-06	0.000106756	1.4542
A_51_P140797	Dcaf6	ENSMUST00000027856	0.540011	0.00162329	0.00667485	1.45398
A_55_P2066414	Dffa	ENSMUST00000103216	0.539707	0.000203527	0.00136274	1.45368
A_51_P275976	Dok1	ENSMUST00000149918	0.539576	9.32265e-06	0.000130284	1.45355
A_51_P182728	Stx1a	ENSMUST00000156626	0.539563	0.00109505	0.00496186	1.45353
A_55_P2080789	Pskh1	ENSMUST00000049699	0.539238	0.00398856	0.0132952	1.4532
A_55_P2044369	Hs2st1	ENSMUST00000043325	0.539234	0.000583498	0.00304348	1.4532
A_55_P2161924	Rabgap1	ENSMUST00000066055	0.53908	3.99336e-06	6.79185e-05	1.45305
A_55_P1983974	Neurl4	ENSMUST00000108617	0.539063	0.000159328	0.00113687	1.45303
A_55_P2034630	Jtb	ENSMUST00000119304	0.539048	0.000249755	0.00159559	1.45301
A_55_P2065726	Snx29	ENSMUST00000134941	0.538815	0.000201233	0.00135325	1.45278
A_55_P1964009	Zfp217	ENSMUST00000063710	0.538335	0.00189391	0.00752269	1.4523
A_51_P308796	Fosl1	ENSMUST00000025850	0.538266	7.47614e-05	0.000641321	1.45223
A_51_P466824	Tyk2	ENSMUST00000001036	0.538264	0.00113826	0.00511258	1.45222
A_52_P78373	Sorbs3	ENSMUST00000022682	0.538204	0.000103874	0.000817671	1.45216
A_52_P240447	Alms1	ENSMUST00000072018	0.538052	5.10301e-05	0.000475518	1.45201
A_51_P321600	Ccdc30	ENSMUST00000152879	0.538043	0.0145846	0.0362851	1.452
A_51_P466288	Frmd5	ENSMUST00000138157	0.53798	0.00188115	0.00748993	1.45194
A_55_P2149122	Farp2	ENSMUST00000041983	0.537953	0.00306432	0.0108507	1.45191
A_65_P16059	Tgfbr3	ENSMUST00000031224	0.537891	0.000454333	0.00252537	1.45185
A_55_P2177426	Abcb8	ENSMUST00000073076	0.537857	0.000122527	0.00092895	1.45181
A_55_P2081555	Phf23	ENSMUST00000133485	0.537564	6.44518e-06	9.8525e-05	1.45152
A_51_P214747	Parp12	ENSMUST00000038398	0.537513	0.00201812	0.00787843	1.45147
A_51_P151433	Ncbp2	ENSMUST00000023460	0.537488	0.000260894	0.00164872	1.45144
A_55_P2062133	Etv3	ENSMUST00000170036	0.537271	0.000279396	0.0017312	1.45123
A_51_P102503	Metap1	ENSMUST00000029804	0.537211	3.88116e-06	6.65342e-05	1.45116
A_52_P404895	Tmem62	ENSMUST00000135599	0.536925	0.000581906	0.0030397	1.45088
A_66_P117058	Aasdh		0.5368	0.000478864	0.00263244	1.45075
A_55_P2121613	Sox4	ENSMUST00000067230	0.536537	4.9408e-05	0.000465329	1.45049
A_55_P2148431	Slc4a3	ENSMUST00000027415	0.536467	0.00029032	0.00178811	1.45042
A_52_P88793	Zfp933	ENSMUST00000105718	0.536195	0.0162003	0.039353	1.45014
A_51_P138790	Plekhf2	ENSMUST00000054776	0.536195	0.00122665	0.00541167	1.45014
A_55_P2066484	Crtc3	ENSMUST00000122255	0.536017	0.0411085	0.0821181	1.44996
A_51_P386344	Mtmr10	ENSMUST00000032736	0.535987	0.000232508	0.00150544	1.44993
A_65_P06029	Fam171b	ENSMUST00000051454	0.535976	0.000800469	0.0038863	1.44992
A_51_P255565	Smarcad1	ENSMUST00000031984	0.535862	0.000438031	0.00245424	1.44981
A_55_P2159865	Zfp59		0.535845	0.000545323	0.00289126	1.44979
A_51_P108862	Cops7a	ENSMUST00000032220	0.535816	2.9678e-05	0.000317506	1.44976
A_52_P262219	Fos	ENSMUST00000021674	0.535792	0.0210776	0.0484078	1.44974
A_52_P377537	Gabra1	ENSMUST00000020707	0.535763	5.08545e-05	0.000474701	1.44971
A_52_P341339	Sos1	ENSMUST00000068714	0.535739	0.00145209	0.00614271	1.44968
A_55_P2174868	Zfp605	ENSMUST00000086686	0.535669	0.00445485	0.0144482	1.44961
A_55_P2019233	Gsto2	ENSMUST00000056159	0.535556	0.000527011	0.00281698	1.4495
A_55_P2061391	Rhobtb3	ENSMUST00000109606	0.535509	0.000376578	0.00219662	1.44945
A_55_P2056140	Flad1	ENSMUST00000107426	0.535491	3.21096e-06	5.75575e-05	1.44944
A_52_P356698	Shox2	ENSMUST00000029422	0.535313	3.81732e-05	0.000382618	1.44926
A_55_P2087162	Specc1l	ENSMUST00000105421	0.535278	6.24732e-05	0.000556462	1.44922
A_52_P245415	AW554918	ENSMUST00000097643	0.535055	0.000307853	0.00187208	1.449
A_55_P2179448			0.535029	0.000815725	0.00394352	1.44897
A_51_P267370	Itm2c	ENSMUST00000027425	0.534858	6.98932e-06	0.000104986	1.4488
A_52_P218955	D3Ertd751e	ENSMUST00000143841	0.534754	0.00319133	0.0111704	1.44869
A_66_P130432	Cd80	ENSMUST00000099816	0.534612	6.0513e-05	0.000542583	1.44855
A_55_P2184905	Rpap2	ENSMUST00000112651	0.534577	0.000160255	0.00114064	1.44852
A_55_P2130970	Parp10	ENSMUST00000075689	0.534539	9.54647e-06	0.000132703	1.44848
A_55_P2032187	Gm12666	ENSMUST00000123179	0.534452	0.00163299	0.00670453	1.44839
A_55_P2006604	2810474O19Rik	ENSMUST00000100765	0.534337	3.3651e-05	0.000348949	1.44828
A_52_P353417	Gm2a	ENSMUST00000000608	0.53427	0.00050524	0.00273788	1.44821
A_55_P2161180	Zfp94	ENSMUST00000032673	0.534053	0.000242119	0.00155416	1.44799
A_55_P2019954	Adra1d		0.533892	3.87365e-05	0.000387544	1.44783
A_55_P2129271	Tead2	ENSMUST00000107801	0.533862	2.72921e-05	0.000297281	1.4478
A_52_P538709	Tada3	ENSMUST00000113106	0.533638	0.000973216	0.00452561	1.44758
A_55_P1974877	Bcl2l1	ENSMUST00000007803	0.533545	1.53785e-05	0.000190577	1.44748
A_51_P197175	Pigk	ENSMUST00000051510	0.533539	1.22806e-05	0.000160182	1.44748
A_51_P496845	Capza2	ENSMUST00000015877	0.533517	0.000853379	0.00408804	1.44745
A_52_P682745	Dock4	ENSMUST00000037488	0.533415	0.000491312	0.00268463	1.44735
A_51_P418901	Prss2	ENSMUST00000070380	0.533281	0.000233888	0.00151336	1.44722
A_55_P2142937			0.533233	0.0943053	0.159277	1.44717
A_55_P2098911	Lrrcc1	ENSMUST00000091325	0.533012	1.41182e-05	0.000178648	1.44695
A_55_P2084248	Adc	ENSMUST00000030581	0.532906	8.91523e-05	0.000727937	1.44684
A_52_P610403	Sf1	ENSMUST00000131252	0.532881	0.000336904	0.00200748	1.44682
A_52_P134141	Pyurf	ENSMUST00000053386	0.532607	1.80035e-05	0.000215443	1.44654
A_55_P2106220	Zfp410	ENSMUST00000045931	0.532444	0.000294055	0.00180636	1.44638
A_51_P283563	Zbtb26	ENSMUST00000102789	0.531876	0.00330359	0.0114695	1.44581
A_52_P219661	Exoc6	ENSMUST00000066439	0.531839	8.6338e-05	0.000711294	1.44577
A_55_P2091247	3000002C10Rik		0.531822	4.94806e-05	0.000465329	1.44575
A_66_P131110	Zfp473	ENSMUST00000120074	0.531723	0.00236766	0.00891431	1.44565
A_55_P2087876	Patz1	ENSMUST00000153603	0.531657	0.000102419	0.000808574	1.44559
A_52_P150565	Usp39	ENSMUST00000154799	0.531641	8.30331e-05	0.000692209	1.44557
A_51_P504672	Mef2d	ENSMUST00000001455	0.531631	0.000107059	0.000836368	1.44556
A_52_P641849	Khnyn	ENSMUST00000022831	0.531523	3.71441e-05	0.000374639	1.44545
A_55_P2076749	Cad	ENSMUST00000013773	0.531521	0.000143575	0.0010534	1.44545
A_55_P2052006	Nol4	ENSMUST00000081423	0.5315	0.00018791	0.00128526	1.44543
A_52_P50305	Ube2k	ENSMUST00000142407	0.531352	0.00276608	0.0100365	1.44528
A_55_P2046938	Adpgk	ENSMUST00000026266	0.531219	5.03511e-05	0.000471633	1.44515
A_55_P2049095	Atat1	ENSMUST00000137069	0.531151	0.000751307	0.00370169	1.44508
A_52_P138967	Trpm4	ENSMUST00000042194	0.530987	0.000146406	0.00106946	1.44492
A_55_P2305294	Ptpn21	ENSMUST00000085116	0.530962	3.68637e-05	0.000372834	1.44489
A_55_P2013843	Gm2016	ENSMUST00000110147	0.530883	0.00156786	0.00650391	1.44481
A_52_P358388	Ppp4r2	ENSMUST00000063854	0.530615	1.40335e-05	0.000177993	1.44454
A_52_P472319	Plxnd1	ENSMUST00000015511	0.530387	9.48725e-05	0.000762085	1.44432
A_55_P2042212	Fam161a	ENSMUST00000172602	0.530365	0.00210916	0.00814406	1.4443
A_52_P566348	Nras	ENSMUST00000128264	0.530335	3.60457e-05	0.000366739	1.44426
A_55_P2081585	Dennd5b	ENSMUST00000111557	0.530271	0.000186057	0.00127866	1.4442
A_66_P130777	Ephb4	ENSMUST00000144296	0.530139	0.000336852	0.00200748	1.44407
A_55_P2107775	Apol9a	ENSMUST00000109775	0.529976	0.000246786	0.00157896	1.44391
A_55_P2035539	D3Ertd751e	ENSMUST00000143841	0.529964	0.000284683	0.00175891	1.44389
A_52_P36218	Upf2	ENSMUST00000128200	0.529912	0.000207298	0.00138113	1.44384
A_55_P2015337			0.529547	1.17225e-05	0.000154206	1.44348
A_55_P1975874	Bcl2l15	ENSMUST00000062945	0.529482	0.000190153	0.00129744	1.44341
A_52_P660242	Isy1	ENSMUST00000089497	0.529422	1.61299e-05	0.000198522	1.44335
A_66_P125823	Nupl1	ENSMUST00000041905	0.529204	0.000709843	0.00354593	1.44313
A_52_P337220	Mgat4b	ENSMUST00000041725	0.528884	1.0634e-05	0.000142845	1.44281
A_51_P377760	Rnasel	ENSMUST00000182722	0.528807	0.00236268	0.00890177	1.44274
A_65_P20167	Hyou1	ENSMUST00000162560	0.528768	0.000313915	0.00190198	1.4427
A_55_P1970399			0.528278	1.87282e-05	0.00022166	1.44221
A_51_P133920	Lmln	ENSMUST00000155920	0.528033	0.0199616	0.0464081	1.44196
A_55_P2082235			0.528031	0.000346001	0.00205207	1.44196
A_52_P286141	Cisd2	ENSMUST00000029815	0.527685	1.11834e-05	0.000148745	1.44161
A_55_P2034731	Rasal2	ENSMUST00000139470	0.527607	1.22251e-05	0.000159554	1.44154
A_55_P2061495	Cks1b	ENSMUST00000029679	0.52745	3.02089e-06	5.50179e-05	1.44138
A_52_P503104	Zfp957	ENSMUST00000040802	0.527383	8.04218e-06	0.000116272	1.44131
A_52_P590474	Ccnl1	ENSMUST00000148623	0.527359	0.000244345	0.00156566	1.44129
A_55_P2090239	Casp8ap2	ENSMUST00000108178	0.527265	0.00544704	0.0168104	1.44119
A_51_P102257	Tns1		0.527107	0.000210097	0.00139548	1.44104
A_55_P2391065	Cep128	ENSMUST00000123400	0.526872	3.90305e-05	0.000389044	1.4408
A_55_P2030647	Dusp13	ENSMUST00000127851	0.526818	0.00102141	0.00469913	1.44075
A_51_P282179	Mtor	ENSMUST00000103221	0.526676	1.07496e-05	0.000143771	1.44061
A_52_P421713	9930012K11Rik	ENSMUST00000140314	0.526618	2.1172e-05	0.00024378	1.44055
A_51_P358066	Mkl2	ENSMUST00000009713	0.526601	0.00108432	0.00492664	1.44053
A_55_P2039180	Zswim8	ENSMUST00000022358	0.526584	0.000106477	0.00083325	1.44051
A_55_P2178608			0.526535	0.00047688	0.00262436	1.44047
A_55_P2062300	Mettl8	ENSMUST00000149181	0.526445	6.25372e-06	9.61292e-05	1.44038
A_55_P2028666			0.526398	0.000401178	0.00229184	1.44033
A_52_P59916	Sptlc2	ENSMUST00000169845	0.526279	0.00360194	0.0122581	1.44021
A_65_P02321	Usp36	ENSMUST00000141647	0.526249	6.61024e-05	0.00058278	1.44018
A_55_P2119348	1700066M21Rik	ENSMUST00000042734	0.526237	0.00219523	0.00839796	1.44017
A_55_P2062593	Gm4924		0.526188	1.12256e-05	0.000149122	1.44012
A_51_P406020	Abhd4	ENSMUST00000180359	0.525857	8.9213e-06	0.000125783	1.43979
A_66_P117495	Capza1	ENSMUST00000094028	0.525609	5.12526e-06	8.21869e-05	1.43954
A_51_P486618	Akr1b10	ENSMUST00000139156	0.525328	5.82234e-06	9.10327e-05	1.43926
A_55_P2098697	Tnfaip2	ENSMUST00000102745	0.52503	3.10848e-05	0.000328168	1.43896
A_55_P2131707	Lpcat1	ENSMUST00000147566	0.524761	5.25203e-05	0.000485693	1.4387
A_51_P185509	Mapre1	ENSMUST00000028981	0.524746	0.00105708	0.00483284	1.43868
A_55_P2099627	Lrrc51	ENSMUST00000130155	0.524705	0.000166002	0.00117178	1.43864
A_55_P2095196	Akr1b10	ENSMUST00000139156	0.524664	1.64127e-05	0.000201314	1.4386
A_65_P07627	Dach1	ENSMUST00000071533	0.524566	0.000599609	0.00311075	1.4385
A_52_P290511	Tstd2	ENSMUST00000107770	0.524483	0.00287787	0.0103397	1.43842
A_52_P105509	Asah2	ENSMUST00000096119	0.524469	0.00151728	0.00634648	1.4384
A_55_P2071566	Mettl14	ENSMUST00000090371	0.524449	0.000134475	0.00100264	1.43838
A_52_P208727	Zmym4	ENSMUST00000106108	0.524347	0.000233194	0.00150944	1.43828
A_55_P2084128	Rbm12b2	ENSMUST00000095143	0.523839	0.00198364	0.0077705	1.43778
A_55_P1969566	Atp9b	ENSMUST00000091790	0.523509	0.00230253	0.00873305	1.43745
A_52_P532227	S1pr1	ENSMUST00000055676	0.523338	1.24094e-05	0.000161417	1.43728
A_51_P492830	Cenph	ENSMUST00000075550	0.523177	0.000438641	0.00245648	1.43712
A_52_P143477	Tgoln1	ENSMUST00000070524	0.522512	1.00803e-05	0.000137806	1.43645
A_55_P2064862	Ica1	ENSMUST00000115520	0.522235	0.00176609	0.0071304	1.43618
A_55_P2074246	Zfp184	ENSMUST00000176511	0.52219	0.000272473	0.00170001	1.43613
A_52_P263490	1700021K19Rik	ENSMUST00000135480	0.522004	0.000116189	0.000889328	1.43595
A_66_P112773	5730409E04Rik	ENSMUST00000097886	0.521879	0.000318978	0.00192568	1.43582
A_55_P2182527	Wars2	ENSMUST00000126875	0.52185	0.00174272	0.00705447	1.4358
A_55_P2062632	Smc5	ENSMUST00000087556	0.52169	0.000174062	0.00121635	1.43564
A_55_P2028532	Ate1	ENSMUST00000094017	0.521586	6.95711e-05	0.000606675	1.43553
A_55_P2143209	Axin1	ENSMUST00000074370	0.521488	3.62568e-05	0.000368343	1.43543
A_52_P273169	Sh3d19	ENSMUST00000107664	0.521477	0.00011611	0.000889088	1.43542
A_52_P51078	Ctsh	ENSMUST00000127842	0.521422	0.000229706	0.00149203	1.43537
A_55_P1957867	Gm3161		0.521224	0.0050618	0.0159218	1.43517
A_55_P2108713			0.521206	0.000148042	0.00107445	1.43515
A_55_P2003005	Capza1	ENSMUST00000094028	0.521053	0.000521095	0.00279435	1.435
A_55_P2070239	Preb	ENSMUST00000074840	0.520973	0.000184558	0.00127038	1.43492
A_51_P411917	Gata6	ENSMUST00000047762	0.520878	0.000537812	0.00286409	1.43483
A_55_P2090050	Ilkap		0.520865	0.00555354	0.0170781	1.43482
A_52_P493620	Fgfr1op2	ENSMUST00000111663	0.520734	2.64448e-05	0.000289365	1.43468
A_55_P2170500	Yipf6	ENSMUST00000054697	0.520667	4.75599e-06	7.74731e-05	1.43462
A_52_P293556	Wdr41	ENSMUST00000160801	0.520623	7.39788e-05	0.000635164	1.43457
A_52_P494930	Fnip2	ENSMUST00000076136	0.520504	0.000687317	0.00345901	1.43446
A_51_P364485	Tnfaip2	ENSMUST00000102745	0.520458	5.1707e-06	8.26699e-05	1.43441
A_55_P2110497	Ddc	ENSMUST00000109659	0.520427	0.000952086	0.0044417	1.43438
A_55_P2032760	Ctif	ENSMUST00000165559	0.520358	7.50885e-06	0.000110537	1.43431
A_55_P1960033	Prune		0.520248	0.0144756	0.0360555	1.4342
A_55_P1969273	Zfp758	ENSMUST00000088765	0.520124	8.65855e-05	0.000712469	1.43408
A_66_P121369	Gars	ENSMUST00000003572	0.5201	4.06152e-05	0.000401321	1.43405
A_51_P394676	Mef2d	ENSMUST00000001455	0.520031	7.93898e-06	0.000115321	1.43399
A_52_P305995	Ammecr1	ENSMUST00000041317	0.520013	3.37345e-05	0.000349312	1.43397
A_55_P1993629			0.519872	3.1357e-05	0.000330074	1.43383
A_55_P2087872			0.519588	0.000175153	0.00122154	1.43355
A_55_P2368625	Sp4	ENSMUST00000026367	0.51958	0.00687542	0.0201314	1.43354
A_52_P156578	Fkbp15	ENSMUST00000107461	0.519552	0.000428022	0.00241076	1.43351
[truncated: 2,114 more rows]
